# Supplementary material for: Colorectal Peritoneal Metastases: A Systematic Review of Current and Emerging Trends in Clinical and Translational Research
Source: Gastroenterol Res Pract. 2019 Apr 1;2019:5180895. doi: 10.1155/2019/5180895 (PMC6466888; doi:10.1155/2019/5180895)
Supplement: Supplementary Materials — Interactive figure for visual interpretation of the CPM research landscape. The available data for the three main categories and their respective subcategories is represented in the form of a sunburst diagram. [file 5180895.f1.zip]

Archive with 5 entries (5 files):
- d3.v3.min.js
- index.html
- reza_data.csv
- sequences.css
- sequences.js
