# Supplementary material for: Colorectal Peritoneal Metastases: A Systematic Review of Current and Emerging Trends in Clinical and Translational Research
Source: Gastroenterol Res Pract. 2019 Apr 1;2019:5180895. doi: 10.1155/2019/5180895 (PMC6466888; doi:10.1155/2019/5180895)
Supplement: Supplementary Materials — Interactive figure for visual interpretation of the CPM research landscape. The available data for the three main categories and their respective subcategories is represented in the form of a sunburst diagram. [file 5180895.f1.zip › d3.v3.min.js]

!function(){function n(n){return null!=n&&!isNaN(n)}function t(n){return n.length}function e(n){for(var t=1;n*t%1;)t*=10;return t}function r(n,t){try{for(var e in t)Object.defineProperty(n.prototype,e,{value:t[e],enumerable:!1})}catch(r){n.prototype=t}}function u(){}function i(n){return aa+n in this}function o(n){return n=aa+n,n in this&&delete this[n]}function a(){var n=[];return this.forEach(function(t){n.push(t)}),n}function c(){var n=0;for(var t in this)t.charCodeAt(0)===ca&&++n;return n}function s(){for(var n in this)if(n.charCodeAt(0)===ca)return!1;return!0}function l(){}function f(n,t,e){return function(){var r=e.apply(t,arguments);return r===t?n:r}}function h(n,t){if(t in n)return t;t=t.charAt(0).toUpperCase()+t.substring(1);for(var e=0,r=sa.length;r>e;++e){var u=sa[e]+t;if(u in n)return u}}function g(){}function p(){}function v(n){function t(){for(var t,r=e,u=-1,i=r.length;++u<i;)(t=r[u].on)&&t.apply(this,arguments);return n}var e=[],r=new u;return t.on=function(t,u){var i,o=r.get(t);return arguments.length<2?o&&o.on:(o&&(o.on=null,e=e.slice(0,i=e.indexOf(o)).concat(e.slice(i+1)),r.remove(t)),u&&e.push(r.set(t,{on:u})),n)},t}function d(){Xo.event.preventDefault()}function m(){for(var n,t=Xo.event;n=t.sourceEvent;)t=n;return t}function y(n){for(var t=new p,e=0,r=arguments.length;++e<r;)t[arguments[e]]=v(t);return t.of=function(e,r){return function(u){try{var i=u.sourceEvent=Xo.event;u.target=n,Xo.event=u,t[u.type].apply(e,r)}finally{Xo.event=i}}},t}function x(n){return fa(n,da),n}function M(n){return"function"==typeof n?n:function(){return ha(n,this)}}function _(n){return"function"==typeof n?n:function(){return ga(n,this)}}function b(n,t){function e(){this.removeAttribute(n)}function r(){this.removeAttributeNS(n.space,n.local)}function u(){this.setAttribute(n,t)}function i(){this.setAttributeNS(n.space,n.local,t)}function o(){var e=t.apply(this,arguments);null==e?this.removeAttribute(n):this.setAttribute(n,e)}function a(){var e=t.apply(this,arguments);null==e?this.removeAttributeNS(n.space,n.local):this.setAttributeNS(n.space,n.local,e)}return n=Xo.ns.qualify(n),null==t?n.local?r:e:"function"==typeof t?n.local?a:o:n.local?i:u}function w(n){return n.trim().replace(/\s+/g," ")}function S(n){return new RegExp("(?:^|\\s+)"+Xo.requote(n)+"(?:\\s+|$)","g")}function k(n){return n.trim().split(/^|\s+/)}function E(n,t){function e(){for(var e=-1;++e<u;)n[e](this,t)}function r(){for(var e=-1,r=t.apply(this,arguments);++e<u;)n[e](this,r)}n=k(n).map(A);var u=n.length;return"function"==typeof t?r:e}function A(n){var t=S(n);return function(e,r){if(u=e.classList)return r?u.add(n):u.remove(n);var u=e.getAttribute("class")||"";r?(t.lastIndex=0,t.test(u)||e.setAttribute("class",w(u+" "+n))):e.setAttribute("class",w(u.replace(t," ")))}}function C(n,t,e){function r(){this.style.removeProperty(n)}function u(){this.style.setProperty(n,t,e)}function i(){var r=t.apply(this,arguments);null==r?this.style.removeProperty(n):this.style.setProperty(n,r,e)}return null==t?r:"function"==typeof t?i:u}function N(n,t){function e(){delete this[n]}function r(){this[n]=t}function u(){var e=t.apply(this,arguments);null==e?delete this[n]:this[n]=e}return null==t?e:"function"==typeof t?u:r}function L(n){return"function"==typeof n?n:(n=Xo.ns.qualify(n)).local?function(){return this.ownerDocument.createElementNS(n.space,n.local)}:function(){return this.ownerDocument.createElementNS(this.namespaceURI,n)}}function z(n){return{__data__:n}}function q(n){return function(){return va(this,n)}}function T(n){return arguments.length||(n=Xo.ascending),function(t,e){return t&&e?n(t.__data__,e.__data__):!t-!e}}function R(n,t){for(var e=0,r=n.length;r>e;e++)for(var u,i=n[e],o=0,a=i.length;a>o;o++)(u=i[o])&&t(u,o,e);return n}function D(n){return fa(n,ya),n}function P(n){var t,e;return function(r,u,i){var o,a=n[i].update,c=a.length;for(i!=e&&(e=i,t=0),u>=t&&(t=u+1);!(o=a[t])&&++t<c;);return o}}function U(){var n=this.__transition__;n&&++n.active}function j(n,t,e){function r(){var t=this[o];t&&(this.removeEventListener(n,t,t.$),delete this[o])}function u(){var u=c(t,Bo(arguments));r.call(this),this.addEventListener(n,this[o]=u,u.$=e),u._=t}function i(){var t,e=new RegExp("^__on([^.]+)"+Xo.requote(n)+"$");for(var r in this)if(t=r.match(e)){var u=this[r];this.removeEventListener(t[1],u,u.$),delete this[r]}}var o="__on"+n,a=n.indexOf("."),c=H;a>0&&(n=n.substring(0,a));var s=Ma.get(n);return s&&(n=s,c=F),a?t?u:r:t?g:i}function H(n,t){return function(e){var r=Xo.event;Xo.event=e,t[0]=this.__data__;try{n.apply(this,t)}finally{Xo.event=r}}}function F(n,t){var e=H(n,t);return function(n){var t=this,r=n.relatedTarget;r&&(r===t||8&r.compareDocumentPosition(t))||e.call(t,n)}}function O(){var n=".dragsuppress-"+ ++ba,t="click"+n,e=Xo.select(Go).on("touchmove"+n,d).on("dragstart"+n,d).on("selectstart"+n,d);if(_a){var r=Jo.style,u=r[_a];r[_a]="none"}return function(i){function o(){e.on(t,null)}e.on(n,null),_a&&(r[_a]=u),i&&(e.on(t,function(){d(),o()},!0),setTimeout(o,0))}}function Y(n,t){t.changedTouches&&(t=t.changedTouches[0]);var e=n.ownerSVGElement||n;if(e.createSVGPoint){var r=e.createSVGPoint();if(0>wa&&(Go.scrollX||Go.scrollY)){e=Xo.select("body").append("svg").style({position:"absolute",top:0,left:0,margin:0,padding:0,border:"none"},"important");var u=e[0][0].getScreenCTM();wa=!(u.f||u.e),e.remove()}return wa?(r.x=t.pageX,r.y=t.pageY):(r.x=t.clientX,r.y=t.clientY),r=r.matrixTransform(n.getScreenCTM().inverse()),[r.x,r.y]}var i=n.getBoundingClientRect();return[t.clientX-i.left-n.clientLeft,t.clientY-i.top-n.clientTop]}function I(n){return n>0?1:0>n?-1:0}function Z(n,t,e){return(t[0]-n[0])*(e[1]-n[1])-(t[1]-n[1])*(e[0]-n[0])}function V(n){return n>1?0:-1>n?Sa:Math.acos(n)}function X(n){return n>1?Ea:-1>n?-Ea:Math.asin(n)}function $(n){return((n=Math.exp(n))-1/n)/2}function B(n){return((n=Math.exp(n))+1/n)/2}function W(n){return((n=Math.exp(2*n))-1)/(n+1)}function J(n){return(n=Math.sin(n/2))*n}function G(){}function K(n,t,e){return new Q(n,t,e)}function Q(n,t,e){this.h=n,this.s=t,this.l=e}function nt(n,t,e){function r(n){return n>360?n-=360:0>n&&(n+=360),60>n?i+(o-i)*n/60:180>n?o:240>n?i+(o-i)*(240-n)/60:i}function u(n){return Math.round(255*r(n))}var i,o;return n=isNaN(n)?0:(n%=360)<0?n+360:n,t=isNaN(t)?0:0>t?0:t>1?1:t,e=0>e?0:e>1?1:e,o=.5>=e?e*(1+t):e+t-e*t,i=2*e-o,gt(u(n+120),u(n),u(n-120))}function tt(n,t,e){return new et(n,t,e)}function et(n,t,e){this.h=n,this.c=t,this.l=e}function rt(n,t,e){return isNaN(n)&&(n=0),isNaN(t)&&(t=0),ut(e,Math.cos(n*=Na)*t,Math.sin(n)*t)}function ut(n,t,e){return new it(n,t,e)}function it(n,t,e){this.l=n,this.a=t,this.b=e}function ot(n,t,e){var r=(n+16)/116,u=r+t/500,i=r-e/200;return u=ct(u)*Fa,r=ct(r)*Oa,i=ct(i)*Ya,gt(lt(3.2404542*u-1.5371385*r-.4985314*i),lt(-.969266*u+1.8760108*r+.041556*i),lt(.0556434*u-.2040259*r+1.0572252*i))}function at(n,t,e){return n>0?tt(Math.atan2(e,t)*La,Math.sqrt(t*t+e*e),n):tt(0/0,0/0,n)}function ct(n){return n>.206893034?n*n*n:(n-4/29)/7.787037}function st(n){return n>.008856?Math.pow(n,1/3):7.787037*n+4/29}function lt(n){return Math.round(255*(.00304>=n?12.92*n:1.055*Math.pow(n,1/2.4)-.055))}function ft(n){return gt(n>>16,255&n>>8,255&n)}function ht(n){return ft(n)+""}function gt(n,t,e){return new pt(n,t,e)}function pt(n,t,e){this.r=n,this.g=t,this.b=e}function vt(n){return 16>n?"0"+Math.max(0,n).toString(16):Math.min(255,n).toString(16)}function dt(n,t,e){var r,u,i,o=0,a=0,c=0;if(r=/([a-z]+)\((.*)\)/i.exec(n))switch(u=r[2].split(","),r[1]){case"hsl":return e(parseFloat(u[0]),parseFloat(u[1])/100,parseFloat(u[2])/100);case"rgb":return t(Mt(u[0]),Mt(u[1]),Mt(u[2]))}return(i=Va.get(n))?t(i.r,i.g,i.b):(null!=n&&"#"===n.charAt(0)&&(4===n.length?(o=n.charAt(1),o+=o,a=n.charAt(2),a+=a,c=n.charAt(3),c+=c):7===n.length&&(o=n.substring(1,3),a=n.substring(3,5),c=n.substring(5,7)),o=parseInt(o,16),a=parseInt(a,16),c=parseInt(c,16)),t(o,a,c))}function mt(n,t,e){var r,u,i=Math.min(n/=255,t/=255,e/=255),o=Math.max(n,t,e),a=o-i,c=(o+i)/2;return a?(u=.5>c?a/(o+i):a/(2-o-i),r=n==o?(t-e)/a+(e>t?6:0):t==o?(e-n)/a+2:(n-t)/a+4,r*=60):(r=0/0,u=c>0&&1>c?0:r),K(r,u,c)}function yt(n,t,e){n=xt(n),t=xt(t),e=xt(e);var r=st((.4124564*n+.3575761*t+.1804375*e)/Fa),u=st((.2126729*n+.7151522*t+.072175*e)/Oa),i=st((.0193339*n+.119192*t+.9503041*e)/Ya);return ut(116*u-16,500*(r-u),200*(u-i))}function xt(n){return(n/=255)<=.04045?n/12.92:Math.pow((n+.055)/1.055,2.4)}function Mt(n){var t=parseFloat(n);return"%"===n.charAt(n.length-1)?Math.round(2.55*t):t}function _t(n){return"function"==typeof n?n:function(){return n}}function bt(n){return n}function wt(n){return function(t,e,r){return 2===arguments.length&&"function"==typeof e&&(r=e,e=null),St(t,e,n,r)}}function St(n,t,e,r){function u(){var n,t=c.status;if(!t&&c.responseText||t>=200&&300>t||304===t){try{n=e.call(i,c)}catch(r){return o.error.call(i,r),void 0}o.load.call(i,n)}else o.error.call(i,c)}var i={},o=Xo.dispatch("beforesend","progress","load","error"),a={},c=new XMLHttpRequest,s=null;return!Go.XDomainRequest||"withCredentials"in c||!/^(http(s)?:)?\/\//.test(n)||(c=new XDomainRequest),"onload"in c?c.onload=c.onerror=u:c.onreadystatechange=function(){c.readyState>3&&u()},c.onprogress=function(n){var t=Xo.event;Xo.event=n;try{o.progress.call(i,c)}finally{Xo.event=t}},i.header=function(n,t){return n=(n+"").toLowerCase(),arguments.length<2?a[n]:(null==t?delete a[n]:a[n]=t+"",i)},i.mimeType=function(n){return arguments.length?(t=null==n?null:n+"",i):t},i.responseType=function(n){return arguments.length?(s=n,i):s},i.response=function(n){return e=n,i},["get","post"].forEach(function(n){i[n]=function(){return i.send.apply(i,[n].concat(Bo(arguments)))}}),i.send=function(e,r,u){if(2===arguments.length&&"function"==typeof r&&(u=r,r=null),c.open(e,n,!0),null==t||"accept"in a||(a.accept=t+",*/*"),c.setRequestHeader)for(var l in a)c.setRequestHeader(l,a[l]);return null!=t&&c.overrideMimeType&&c.overrideMimeType(t),null!=s&&(c.responseType=s),null!=u&&i.on("error",u).on("load",function(n){u(null,n)}),o.beforesend.call(i,c),c.send(null==r?null:r),i},i.abort=function(){return c.abort(),i},Xo.rebind(i,o,"on"),null==r?i:i.get(kt(r))}function kt(n){return 1===n.length?function(t,e){n(null==t?e:null)}:n}function Et(){var n=At(),t=Ct()-n;t>24?(isFinite(t)&&(clearTimeout(Wa),Wa=setTimeout(Et,t)),Ba=0):(Ba=1,Ga(Et))}function At(){var n=Date.now();for(Ja=Xa;Ja;)n>=Ja.t&&(Ja.f=Ja.c(n-Ja.t)),Ja=Ja.n;return n}function Ct(){for(var n,t=Xa,e=1/0;t;)t.f?t=n?n.n=t.n:Xa=t.n:(t.t<e&&(e=t.t),t=(n=t).n);return $a=n,e}function Nt(n,t){return t-(n?Math.ceil(Math.log(n)/Math.LN10):1)}function Lt(n,t){var e=Math.pow(10,3*oa(8-t));return{scale:t>8?function(n){return n/e}:function(n){return n*e},symbol:n}}function zt(n){var t=n.decimal,e=n.thousands,r=n.grouping,u=n.currency,i=r?function(n){for(var t=n.length,u=[],i=0,o=r[0];t>0&&o>0;)u.push(n.substring(t-=o,t+o)),o=r[i=(i+1)%r.length];return u.reverse().join(e)}:bt;return function(n){var e=Qa.exec(n),r=e[1]||" ",o=e[2]||">",a=e[3]||"",c=e[4]||"",s=e[5],l=+e[6],f=e[7],h=e[8],g=e[9],p=1,v="",d="",m=!1;switch(h&&(h=+h.substring(1)),(s||"0"===r&&"="===o)&&(s=r="0",o="=",f&&(l-=Math.floor((l-1)/4))),g){case"n":f=!0,g="g";break;case"%":p=100,d="%",g="f";break;case"p":p=100,d="%",g="r";break;case"b":case"o":case"x":case"X":"#"===c&&(v="0"+g.toLowerCase());case"c":case"d":m=!0,h=0;break;case"s":p=-1,g="r"}"$"===c&&(v=u[0],d=u[1]),"r"!=g||h||(g="g"),null!=h&&("g"==g?h=Math.max(1,Math.min(21,h)):("e"==g||"f"==g)&&(h=Math.max(0,Math.min(20,h)))),g=nc.get(g)||qt;var y=s&&f;return function(n){var e=d;if(m&&n%1)return"";var u=0>n||0===n&&0>1/n?(n=-n,"-"):a;if(0>p){var c=Xo.formatPrefix(n,h);n=c.scale(n),e=c.symbol+d}else n*=p;n=g(n,h);var x=n.lastIndexOf("."),M=0>x?n:n.substring(0,x),_=0>x?"":t+n.substring(x+1);!s&&f&&(M=i(M));var b=v.length+M.length+_.length+(y?0:u.length),w=l>b?new Array(b=l-b+1).join(r):"";return y&&(M=i(w+M)),u+=v,n=M+_,("<"===o?u+n+w:">"===o?w+u+n:"^"===o?w.substring(0,b>>=1)+u+n+w.substring(b):u+(y?n:w+n))+e}}}function qt(n){return n+""}function Tt(){this._=new Date(arguments.length>1?Date.UTC.apply(this,arguments):arguments[0])}function Rt(n,t,e){function r(t){var e=n(t),r=i(e,1);return r-t>t-e?e:r}function u(e){return t(e=n(new ec(e-1)),1),e}function i(n,e){return t(n=new ec(+n),e),n}function o(n,r,i){var o=u(n),a=[];if(i>1)for(;r>o;)e(o)%i||a.push(new Date(+o)),t(o,1);else for(;r>o;)a.push(new Date(+o)),t(o,1);return a}function a(n,t,e){try{ec=Tt;var r=new Tt;return r._=n,o(r,t,e)}finally{ec=Date}}n.floor=n,n.round=r,n.ceil=u,n.offset=i,n.range=o;var c=n.utc=Dt(n);return c.floor=c,c.round=Dt(r),c.ceil=Dt(u),c.offset=Dt(i),c.range=a,n}function Dt(n){return function(t,e){try{ec=Tt;var r=new Tt;return r._=t,n(r,e)._}finally{ec=Date}}}function Pt(n){function t(n){function t(t){for(var e,u,i,o=[],a=-1,c=0;++a<r;)37===n.charCodeAt(a)&&(o.push(n.substring(c,a)),null!=(u=uc[e=n.charAt(++a)])&&(e=n.charAt(++a)),(i=C[e])&&(e=i(t,null==u?"e"===e?" ":"0":u)),o.push(e),c=a+1);return o.push(n.substring(c,a)),o.join("")}var r=n.length;return t.parse=function(t){var r={y:1900,m:0,d:1,H:0,M:0,S:0,L:0,Z:null},u=e(r,n,t,0);if(u!=t.length)return null;"p"in r&&(r.H=r.H%12+12*r.p);var i=null!=r.Z&&ec!==Tt,o=new(i?Tt:ec);return"j"in r?o.setFullYear(r.y,0,r.j):"w"in r&&("W"in r||"U"in r)?(o.setFullYear(r.y,0,1),o.setFullYear(r.y,0,"W"in r?(r.w+6)%7+7*r.W-(o.getDay()+5)%7:r.w+7*r.U-(o.getDay()+6)%7)):o.setFullYear(r.y,r.m,r.d),o.setHours(r.H+Math.floor(r.Z/100),r.M+r.Z%100,r.S,r.L),i?o._:o},t.toString=function(){return n},t}function e(n,t,e,r){for(var u,i,o,a=0,c=t.length,s=e.length;c>a;){if(r>=s)return-1;if(u=t.charCodeAt(a++),37===u){if(o=t.charAt(a++),i=N[o in uc?t.charAt(a++):o],!i||(r=i(n,e,r))<0)return-1}else if(u!=e.charCodeAt(r++))return-1}return r}function r(n,t,e){b.lastIndex=0;var r=b.exec(t.substring(e));return r?(n.w=w.get(r[0].toLowerCase()),e+r[0].length):-1}function u(n,t,e){M.lastIndex=0;var r=M.exec(t.substring(e));return r?(n.w=_.get(r[0].toLowerCase()),e+r[0].length):-1}function i(n,t,e){E.lastIndex=0;var r=E.exec(t.substring(e));return r?(n.m=A.get(r[0].toLowerCase()),e+r[0].length):-1}function o(n,t,e){S.lastIndex=0;var r=S.exec(t.substring(e));return r?(n.m=k.get(r[0].toLowerCase()),e+r[0].length):-1}function a(n,t,r){return e(n,C.c.toString(),t,r)}function c(n,t,r){return e(n,C.x.toString(),t,r)}function s(n,t,r){return e(n,C.X.toString(),t,r)}function l(n,t,e){var r=x.get(t.substring(e,e+=2).toLowerCase());return null==r?-1:(n.p=r,e)}var f=n.dateTime,h=n.date,g=n.time,p=n.periods,v=n.days,d=n.shortDays,m=n.months,y=n.shortMonths;t.utc=function(n){function e(n){try{ec=Tt;var t=new ec;return t._=n,r(t)}finally{ec=Date}}var r=t(n);return e.parse=function(n){try{ec=Tt;var t=r.parse(n);return t&&t._}finally{ec=Date}},e.toString=r.toString,e},t.multi=t.utc.multi=ee;var x=Xo.map(),M=jt(v),_=Ht(v),b=jt(d),w=Ht(d),S=jt(m),k=Ht(m),E=jt(y),A=Ht(y);p.forEach(function(n,t){x.set(n.toLowerCase(),t)});var C={a:function(n){return d[n.getDay()]},A:function(n){return v[n.getDay()]},b:function(n){return y[n.getMonth()]},B:function(n){return m[n.getMonth()]},c:t(f),d:function(n,t){return Ut(n.getDate(),t,2)},e:function(n,t){return Ut(n.getDate(),t,2)},H:function(n,t){return Ut(n.getHours(),t,2)},I:function(n,t){return Ut(n.getHours()%12||12,t,2)},j:function(n,t){return Ut(1+tc.dayOfYear(n),t,3)},L:function(n,t){return Ut(n.getMilliseconds(),t,3)},m:function(n,t){return Ut(n.getMonth()+1,t,2)},M:function(n,t){return Ut(n.getMinutes(),t,2)},p:function(n){return p[+(n.getHours()>=12)]},S:function(n,t){return Ut(n.getSeconds(),t,2)},U:function(n,t){return Ut(tc.sundayOfYear(n),t,2)},w:function(n){return n.getDay()},W:function(n,t){return Ut(tc.mondayOfYear(n),t,2)},x:t(h),X:t(g),y:function(n,t){return Ut(n.getFullYear()%100,t,2)},Y:function(n,t){return Ut(n.getFullYear()%1e4,t,4)},Z:ne,"%":function(){return"%"}},N={a:r,A:u,b:i,B:o,c:a,d:Bt,e:Bt,H:Jt,I:Jt,j:Wt,L:Qt,m:$t,M:Gt,p:l,S:Kt,U:Ot,w:Ft,W:Yt,x:c,X:s,y:Zt,Y:It,Z:Vt,"%":te};return t}function Ut(n,t,e){var r=0>n?"-":"",u=(r?-n:n)+"",i=u.length;return r+(e>i?new Array(e-i+1).join(t)+u:u)}function jt(n){return new RegExp("^(?:"+n.map(Xo.requote).join("|")+")","i")}function Ht(n){for(var t=new u,e=-1,r=n.length;++e<r;)t.set(n[e].toLowerCase(),e);return t}function Ft(n,t,e){ic.lastIndex=0;var r=ic.exec(t.substring(e,e+1));return r?(n.w=+r[0],e+r[0].length):-1}function Ot(n,t,e){ic.lastIndex=0;var r=ic.exec(t.substring(e));return r?(n.U=+r[0],e+r[0].length):-1}function Yt(n,t,e){ic.lastIndex=0;var r=ic.exec(t.substring(e));return r?(n.W=+r[0],e+r[0].length):-1}function It(n,t,e){ic.lastIndex=0;var r=ic.exec(t.substring(e,e+4));return r?(n.y=+r[0],e+r[0].length):-1}function Zt(n,t,e){ic.lastIndex=0;var r=ic.exec(t.substring(e,e+2));return r?(n.y=Xt(+r[0]),e+r[0].length):-1}function Vt(n,t,e){return/^[+-]\d{4}$/.test(t=t.substring(e,e+5))?(n.Z=+t,e+5):-1}function Xt(n){return n+(n>68?1900:2e3)}function $t(n,t,e){ic.lastIndex=0;var r=ic.exec(t.substring(e,e+2));return r?(n.m=r[0]-1,e+r[0].length):-1}function Bt(n,t,e){ic.lastIndex=0;var r=ic.exec(t.substring(e,e+2));return r?(n.d=+r[0],e+r[0].length):-1}function Wt(n,t,e){ic.lastIndex=0;var r=ic.exec(t.substring(e,e+3));return r?(n.j=+r[0],e+r[0].length):-1}function Jt(n,t,e){ic.lastIndex=0;var r=ic.exec(t.substring(e,e+2));return r?(n.H=+r[0],e+r[0].length):-1}function Gt(n,t,e){ic.lastIndex=0;var r=ic.exec(t.substring(e,e+2));return r?(n.M=+r[0],e+r[0].length):-1}function Kt(n,t,e){ic.lastIndex=0;var r=ic.exec(t.substring(e,e+2));return r?(n.S=+r[0],e+r[0].length):-1}function Qt(n,t,e){ic.lastIndex=0;var r=ic.exec(t.substring(e,e+3));return r?(n.L=+r[0],e+r[0].length):-1}function ne(n){var t=n.getTimezoneOffset(),e=t>0?"-":"+",r=~~(oa(t)/60),u=oa(t)%60;return e+Ut(r,"0",2)+Ut(u,"0",2)}function te(n,t,e){oc.lastIndex=0;var r=oc.exec(t.substring(e,e+1));return r?e+r[0].length:-1}function ee(n){for(var t=n.length,e=-1;++e<t;)n[e][0]=this(n[e][0]);return function(t){for(var e=0,r=n[e];!r[1](t);)r=n[++e];return r[0](t)}}function re(){}function ue(n,t,e){var r=e.s=n+t,u=r-n,i=r-u;e.t=n-i+(t-u)}function ie(n,t){n&&lc.hasOwnProperty(n.type)&&lc[n.type](n,t)}function oe(n,t,e){var r,u=-1,i=n.length-e;for(t.lineStart();++u<i;)r=n[u],t.point(r[0],r[1],r[2]);t.lineEnd()}function ae(n,t){var e=-1,r=n.length;for(t.polygonStart();++e<r;)oe(n[e],t,1);t.polygonEnd()}function ce(){function n(n,t){n*=Na,t=t*Na/2+Sa/4;var e=n-r,o=Math.cos(t),a=Math.sin(t),c=i*a,s=u*o+c*Math.cos(e),l=c*Math.sin(e);hc.add(Math.atan2(l,s)),r=n,u=o,i=a}var t,e,r,u,i;gc.point=function(o,a){gc.point=n,r=(t=o)*Na,u=Math.cos(a=(e=a)*Na/2+Sa/4),i=Math.sin(a)},gc.lineEnd=function(){n(t,e)}}function se(n){var t=n[0],e=n[1],r=Math.cos(e);return[r*Math.cos(t),r*Math.sin(t),Math.sin(e)]}function le(n,t){return n[0]*t[0]+n[1]*t[1]+n[2]*t[2]}function fe(n,t){return[n[1]*t[2]-n[2]*t[1],n[2]*t[0]-n[0]*t[2],n[0]*t[1]-n[1]*t[0]]}function he(n,t){n[0]+=t[0],n[1]+=t[1],n[2]+=t[2]}function ge(n,t){return[n[0]*t,n[1]*t,n[2]*t]}function pe(n){var t=Math.sqrt(n[0]*n[0]+n[1]*n[1]+n[2]*n[2]);n[0]/=t,n[1]/=t,n[2]/=t}function ve(n){return[Math.atan2(n[1],n[0]),X(n[2])]}function de(n,t){return oa(n[0]-t[0])<Aa&&oa(n[1]-t[1])<Aa}function me(n,t){n*=Na;var e=Math.cos(t*=Na);ye(e*Math.cos(n),e*Math.sin(n),Math.sin(t))}function ye(n,t,e){++pc,dc+=(n-dc)/pc,mc+=(t-mc)/pc,yc+=(e-yc)/pc}function xe(){function n(n,u){n*=Na;var i=Math.cos(u*=Na),o=i*Math.cos(n),a=i*Math.sin(n),c=Math.sin(u),s=Math.atan2(Math.sqrt((s=e*c-r*a)*s+(s=r*o-t*c)*s+(s=t*a-e*o)*s),t*o+e*a+r*c);vc+=s,xc+=s*(t+(t=o)),Mc+=s*(e+(e=a)),_c+=s*(r+(r=c)),ye(t,e,r)}var t,e,r;kc.point=function(u,i){u*=Na;var o=Math.cos(i*=Na);t=o*Math.cos(u),e=o*Math.sin(u),r=Math.sin(i),kc.point=n,ye(t,e,r)}}function Me(){kc.point=me}function _e(){function n(n,t){n*=Na;var e=Math.cos(t*=Na),o=e*Math.cos(n),a=e*Math.sin(n),c=Math.sin(t),s=u*c-i*a,l=i*o-r*c,f=r*a-u*o,h=Math.sqrt(s*s+l*l+f*f),g=r*o+u*a+i*c,p=h&&-V(g)/h,v=Math.atan2(h,g);bc+=p*s,wc+=p*l,Sc+=p*f,vc+=v,xc+=v*(r+(r=o)),Mc+=v*(u+(u=a)),_c+=v*(i+(i=c)),ye(r,u,i)}var t,e,r,u,i;kc.point=function(o,a){t=o,e=a,kc.point=n,o*=Na;var c=Math.cos(a*=Na);r=c*Math.cos(o),u=c*Math.sin(o),i=Math.sin(a),ye(r,u,i)},kc.lineEnd=function(){n(t,e),kc.lineEnd=Me,kc.point=me}}function be(){return!0}function we(n,t,e,r,u){var i=[],o=[];if(n.forEach(function(n){if(!((t=n.length-1)<=0)){var t,e=n[0],r=n[t];if(de(e,r)){u.lineStart();for(var a=0;t>a;++a)u.point((e=n[a])[0],e[1]);return u.lineEnd(),void 0}var c=new ke(e,n,null,!0),s=new ke(e,null,c,!1);c.o=s,i.push(c),o.push(s),c=new ke(r,n,null,!1),s=new ke(r,null,c,!0),c.o=s,i.push(c),o.push(s)}}),o.sort(t),Se(i),Se(o),i.length){for(var a=0,c=e,s=o.length;s>a;++a)o[a].e=c=!c;for(var l,f,h=i[0];;){for(var g=h,p=!0;g.v;)if((g=g.n)===h)return;l=g.z,u.lineStart();do{if(g.v=g.o.v=!0,g.e){if(p)for(var a=0,s=l.length;s>a;++a)u.point((f=l[a])[0],f[1]);else r(g.x,g.n.x,1,u);g=g.n}else{if(p){l=g.p.z;for(var a=l.length-1;a>=0;--a)u.point((f=l[a])[0],f[1])}else r(g.x,g.p.x,-1,u);g=g.p}g=g.o,l=g.z,p=!p}while(!g.v);u.lineEnd()}}}function Se(n){if(t=n.length){for(var t,e,r=0,u=n[0];++r<t;)u.n=e=n[r],e.p=u,u=e;u.n=e=n[0],e.p=u}}function ke(n,t,e,r){this.x=n,this.z=t,this.o=e,this.e=r,this.v=!1,this.n=this.p=null}function Ee(n,t,e,r){return function(u,i){function o(t,e){var r=u(t,e);n(t=r[0],e=r[1])&&i.point(t,e)}function a(n,t){var e=u(n,t);d.point(e[0],e[1])}function c(){y.point=a,d.lineStart()}function s(){y.point=o,d.lineEnd()}function l(n,t){v.push([n,t]);var e=u(n,t);M.point(e[0],e[1])}function f(){M.lineStart(),v=[]}function h(){l(v[0][0],v[0][1]),M.lineEnd();var n,t=M.clean(),e=x.buffer(),r=e.length;if(v.pop(),p.push(v),v=null,r){if(1&t){n=e[0];var u,r=n.length-1,o=-1;for(i.lineStart();++o<r;)i.point((u=n[o])[0],u[1]);return i.lineEnd(),void 0}r>1&&2&t&&e.push(e.pop().concat(e.shift())),g.push(e.filter(Ae))}}var g,p,v,d=t(i),m=u.invert(r[0],r[1]),y={point:o,lineStart:c,lineEnd:s,polygonStart:function(){y.point=l,y.lineStart=f,y.lineEnd=h,g=[],p=[],i.polygonStart()},polygonEnd:function(){y.point=o,y.lineStart=c,y.lineEnd=s,g=Xo.merge(g);var n=Le(m,p);g.length?we(g,Ne,n,e,i):n&&(i.lineStart(),e(null,null,1,i),i.lineEnd()),i.polygonEnd(),g=p=null},sphere:function(){i.polygonStart(),i.lineStart(),e(null,null,1,i),i.lineEnd(),i.polygonEnd()}},x=Ce(),M=t(x);return y}}function Ae(n){return n.length>1}function Ce(){var n,t=[];return{lineStart:function(){t.push(n=[])},point:function(t,e){n.push([t,e])},lineEnd:g,buffer:function(){var e=t;return t=[],n=null,e},rejoin:function(){t.length>1&&t.push(t.pop().concat(t.shift()))}}}function Ne(n,t){return((n=n.x)[0]<0?n[1]-Ea-Aa:Ea-n[1])-((t=t.x)[0]<0?t[1]-Ea-Aa:Ea-t[1])}function Le(n,t){var e=n[0],r=n[1],u=[Math.sin(e),-Math.cos(e),0],i=0,o=0;hc.reset();for(var a=0,c=t.length;c>a;++a){var s=t[a],l=s.length;if(l)for(var f=s[0],h=f[0],g=f[1]/2+Sa/4,p=Math.sin(g),v=Math.cos(g),d=1;;){d===l&&(d=0),n=s[d];var m=n[0],y=n[1]/2+Sa/4,x=Math.sin(y),M=Math.cos(y),_=m-h,b=oa(_)>Sa,w=p*x;if(hc.add(Math.atan2(w*Math.sin(_),v*M+w*Math.cos(_))),i+=b?_+(_>=0?ka:-ka):_,b^h>=e^m>=e){var S=fe(se(f),se(n));pe(S);var k=fe(u,S);pe(k);var E=(b^_>=0?-1:1)*X(k[2]);(r>E||r===E&&(S[0]||S[1]))&&(o+=b^_>=0?1:-1)}if(!d++)break;h=m,p=x,v=M,f=n}}return(-Aa>i||Aa>i&&0>hc)^1&o}function ze(n){var t,e=0/0,r=0/0,u=0/0;return{lineStart:function(){n.lineStart(),t=1},point:function(i,o){var a=i>0?Sa:-Sa,c=oa(i-e);oa(c-Sa)<Aa?(n.point(e,r=(r+o)/2>0?Ea:-Ea),n.point(u,r),n.lineEnd(),n.lineStart(),n.point(a,r),n.point(i,r),t=0):u!==a&&c>=Sa&&(oa(e-u)<Aa&&(e-=u*Aa),oa(i-a)<Aa&&(i-=a*Aa),r=qe(e,r,i,o),n.point(u,r),n.lineEnd(),n.lineStart(),n.point(a,r),t=0),n.point(e=i,r=o),u=a},lineEnd:function(){n.lineEnd(),e=r=0/0},clean:function(){return 2-t}}}function qe(n,t,e,r){var u,i,o=Math.sin(n-e);return oa(o)>Aa?Math.atan((Math.sin(t)*(i=Math.cos(r))*Math.sin(e)-Math.sin(r)*(u=Math.cos(t))*Math.sin(n))/(u*i*o)):(t+r)/2}function Te(n,t,e,r){var u;if(null==n)u=e*Ea,r.point(-Sa,u),r.point(0,u),r.point(Sa,u),r.point(Sa,0),r.point(Sa,-u),r.point(0,-u),r.point(-Sa,-u),r.point(-Sa,0),r.point(-Sa,u);else if(oa(n[0]-t[0])>Aa){var i=n[0]<t[0]?Sa:-Sa;u=e*i/2,r.point(-i,u),r.point(0,u),r.point(i,u)}else r.point(t[0],t[1])}function Re(n){function t(n,t){return Math.cos(n)*Math.cos(t)>i}function e(n){var e,i,c,s,l;return{lineStart:function(){s=c=!1,l=1},point:function(f,h){var g,p=[f,h],v=t(f,h),d=o?v?0:u(f,h):v?u(f+(0>f?Sa:-Sa),h):0;if(!e&&(s=c=v)&&n.lineStart(),v!==c&&(g=r(e,p),(de(e,g)||de(p,g))&&(p[0]+=Aa,p[1]+=Aa,v=t(p[0],p[1]))),v!==c)l=0,v?(n.lineStart(),g=r(p,e),n.point(g[0],g[1])):(g=r(e,p),n.point(g[0],g[1]),n.lineEnd()),e=g;else if(a&&e&&o^v){var m;d&i||!(m=r(p,e,!0))||(l=0,o?(n.lineStart(),n.point(m[0][0],m[0][1]),n.point(m[1][0],m[1][1]),n.lineEnd()):(n.point(m[1][0],m[1][1]),n.lineEnd(),n.lineStart(),n.point(m[0][0],m[0][1])))}!v||e&&de(e,p)||n.point(p[0],p[1]),e=p,c=v,i=d},lineEnd:function(){c&&n.lineEnd(),e=null},clean:function(){return l|(s&&c)<<1}}}function r(n,t,e){var r=se(n),u=se(t),o=[1,0,0],a=fe(r,u),c=le(a,a),s=a[0],l=c-s*s;if(!l)return!e&&n;var f=i*c/l,h=-i*s/l,g=fe(o,a),p=ge(o,f),v=ge(a,h);he(p,v);var d=g,m=le(p,d),y=le(d,d),x=m*m-y*(le(p,p)-1);if(!(0>x)){var M=Math.sqrt(x),_=ge(d,(-m-M)/y);if(he(_,p),_=ve(_),!e)return _;var b,w=n[0],S=t[0],k=n[1],E=t[1];w>S&&(b=w,w=S,S=b);var A=S-w,C=oa(A-Sa)<Aa,N=C||Aa>A;if(!C&&k>E&&(b=k,k=E,E=b),N?C?k+E>0^_[1]<(oa(_[0]-w)<Aa?k:E):k<=_[1]&&_[1]<=E:A>Sa^(w<=_[0]&&_[0]<=S)){var L=ge(d,(-m+M)/y);return he(L,p),[_,ve(L)]}}}function u(t,e){var r=o?n:Sa-n,u=0;return-r>t?u|=1:t>r&&(u|=2),-r>e?u|=4:e>r&&(u|=8),u}var i=Math.cos(n),o=i>0,a=oa(i)>Aa,c=cr(n,6*Na);return Ee(t,e,c,o?[0,-n]:[-Sa,n-Sa])}function De(n,t,e,r){return function(u){var i,o=u.a,a=u.b,c=o.x,s=o.y,l=a.x,f=a.y,h=0,g=1,p=l-c,v=f-s;if(i=n-c,p||!(i>0)){if(i/=p,0>p){if(h>i)return;g>i&&(g=i)}else if(p>0){if(i>g)return;i>h&&(h=i)}if(i=e-c,p||!(0>i)){if(i/=p,0>p){if(i>g)return;i>h&&(h=i)}else if(p>0){if(h>i)return;g>i&&(g=i)}if(i=t-s,v||!(i>0)){if(i/=v,0>v){if(h>i)return;g>i&&(g=i)}else if(v>0){if(i>g)return;i>h&&(h=i)}if(i=r-s,v||!(0>i)){if(i/=v,0>v){if(i>g)return;i>h&&(h=i)}else if(v>0){if(h>i)return;g>i&&(g=i)}return h>0&&(u.a={x:c+h*p,y:s+h*v}),1>g&&(u.b={x:c+g*p,y:s+g*v}),u}}}}}}function Pe(n,t,e,r){function u(r,u){return oa(r[0]-n)<Aa?u>0?0:3:oa(r[0]-e)<Aa?u>0?2:1:oa(r[1]-t)<Aa?u>0?1:0:u>0?3:2}function i(n,t){return o(n.x,t.x)}function o(n,t){var e=u(n,1),r=u(t,1);return e!==r?e-r:0===e?t[1]-n[1]:1===e?n[0]-t[0]:2===e?n[1]-t[1]:t[0]-n[0]}return function(a){function c(n){for(var t=0,e=d.length,r=n[1],u=0;e>u;++u)for(var i,o=1,a=d[u],c=a.length,s=a[0];c>o;++o)i=a[o],s[1]<=r?i[1]>r&&Z(s,i,n)>0&&++t:i[1]<=r&&Z(s,i,n)<0&&--t,s=i;return 0!==t}function s(i,a,c,s){var l=0,f=0;if(null==i||(l=u(i,c))!==(f=u(a,c))||o(i,a)<0^c>0){do s.point(0===l||3===l?n:e,l>1?r:t);while((l=(l+c+4)%4)!==f)}else s.point(a[0],a[1])}function l(u,i){return u>=n&&e>=u&&i>=t&&r>=i}function f(n,t){l(n,t)&&a.point(n,t)}function h(){N.point=p,d&&d.push(m=[]),S=!0,w=!1,_=b=0/0}function g(){v&&(p(y,x),M&&w&&A.rejoin(),v.push(A.buffer())),N.point=f,w&&a.lineEnd()}function p(n,t){n=Math.max(-Ac,Math.min(Ac,n)),t=Math.max(-Ac,Math.min(Ac,t));var e=l(n,t);if(d&&m.push([n,t]),S)y=n,x=t,M=e,S=!1,e&&(a.lineStart(),a.point(n,t));else if(e&&w)a.point(n,t);else{var r={a:{x:_,y:b},b:{x:n,y:t}};C(r)?(w||(a.lineStart(),a.point(r.a.x,r.a.y)),a.point(r.b.x,r.b.y),e||a.lineEnd(),k=!1):e&&(a.lineStart(),a.point(n,t),k=!1)}_=n,b=t,w=e}var v,d,m,y,x,M,_,b,w,S,k,E=a,A=Ce(),C=De(n,t,e,r),N={point:f,lineStart:h,lineEnd:g,polygonStart:function(){a=A,v=[],d=[],k=!0},polygonEnd:function(){a=E,v=Xo.merge(v);var t=c([n,r]),e=k&&t,u=v.length;(e||u)&&(a.polygonStart(),e&&(a.lineStart(),s(null,null,1,a),a.lineEnd()),u&&we(v,i,t,s,a),a.polygonEnd()),v=d=m=null}};return N}}function Ue(n,t){function e(e,r){return e=n(e,r),t(e[0],e[1])}return n.invert&&t.invert&&(e.invert=function(e,r){return e=t.invert(e,r),e&&n.invert(e[0],e[1])}),e}function je(n){var t=0,e=Sa/3,r=nr(n),u=r(t,e);return u.parallels=function(n){return arguments.length?r(t=n[0]*Sa/180,e=n[1]*Sa/180):[180*(t/Sa),180*(e/Sa)]},u}function He(n,t){function e(n,t){var e=Math.sqrt(i-2*u*Math.sin(t))/u;return[e*Math.sin(n*=u),o-e*Math.cos(n)]}var r=Math.sin(n),u=(r+Math.sin(t))/2,i=1+r*(2*u-r),o=Math.sqrt(i)/u;return e.invert=function(n,t){var e=o-t;return[Math.atan2(n,e)/u,X((i-(n*n+e*e)*u*u)/(2*u))]},e}function Fe(){function n(n,t){Nc+=u*n-r*t,r=n,u=t}var t,e,r,u;Rc.point=function(i,o){Rc.point=n,t=r=i,e=u=o},Rc.lineEnd=function(){n(t,e)}}function Oe(n,t){Lc>n&&(Lc=n),n>qc&&(qc=n),zc>t&&(zc=t),t>Tc&&(Tc=t)}function Ye(){function n(n,t){o.push("M",n,",",t,i)}function t(n,t){o.push("M",n,",",t),a.point=e}function e(n,t){o.push("L",n,",",t)}function r(){a.point=n}function u(){o.push("Z")}var i=Ie(4.5),o=[],a={point:n,lineStart:function(){a.point=t},lineEnd:r,polygonStart:function(){a.lineEnd=u},polygonEnd:function(){a.lineEnd=r,a.point=n},pointRadius:function(n){return i=Ie(n),a},result:function(){if(o.length){var n=o.join("");return o=[],n}}};return a}function Ie(n){return"m0,"+n+"a"+n+","+n+" 0 1,1 0,"+-2*n+"a"+n+","+n+" 0 1,1 0,"+2*n+"z"}function Ze(n,t){dc+=n,mc+=t,++yc}function Ve(){function n(n,r){var u=n-t,i=r-e,o=Math.sqrt(u*u+i*i);xc+=o*(t+n)/2,Mc+=o*(e+r)/2,_c+=o,Ze(t=n,e=r)}var t,e;Pc.point=function(r,u){Pc.point=n,Ze(t=r,e=u)}}function Xe(){Pc.point=Ze}function $e(){function n(n,t){var e=n-r,i=t-u,o=Math.sqrt(e*e+i*i);xc+=o*(r+n)/2,Mc+=o*(u+t)/2,_c+=o,o=u*n-r*t,bc+=o*(r+n),wc+=o*(u+t),Sc+=3*o,Ze(r=n,u=t)}var t,e,r,u;Pc.point=function(i,o){Pc.point=n,Ze(t=r=i,e=u=o)},Pc.lineEnd=function(){n(t,e)}}function Be(n){function t(t,e){n.moveTo(t,e),n.arc(t,e,o,0,ka)}function e(t,e){n.moveTo(t,e),a.point=r}function r(t,e){n.lineTo(t,e)}function u(){a.point=t}function i(){n.closePath()}var o=4.5,a={point:t,lineStart:function(){a.point=e},lineEnd:u,polygonStart:function(){a.lineEnd=i},polygonEnd:function(){a.lineEnd=u,a.point=t},pointRadius:function(n){return o=n,a},result:g};return a}function We(n){function t(n){return(a?r:e)(n)}function e(t){return Ke(t,function(e,r){e=n(e,r),t.point(e[0],e[1])})}function r(t){function e(e,r){e=n(e,r),t.point(e[0],e[1])}function r(){x=0/0,S.point=i,t.lineStart()}function i(e,r){var i=se([e,r]),o=n(e,r);u(x,M,y,_,b,w,x=o[0],M=o[1],y=e,_=i[0],b=i[1],w=i[2],a,t),t.point(x,M)}function o(){S.point=e,t.lineEnd()}function c(){r(),S.point=s,S.lineEnd=l}function s(n,t){i(f=n,h=t),g=x,p=M,v=_,d=b,m=w,S.point=i}function l(){u(x,M,y,_,b,w,g,p,f,v,d,m,a,t),S.lineEnd=o,o()}var f,h,g,p,v,d,m,y,x,M,_,b,w,S={point:e,lineStart:r,lineEnd:o,polygonStart:function(){t.polygonStart(),S.lineStart=c},polygonEnd:function(){t.polygonEnd(),S.lineStart=r}};return S}function u(t,e,r,a,c,s,l,f,h,g,p,v,d,m){var y=l-t,x=f-e,M=y*y+x*x;if(M>4*i&&d--){var _=a+g,b=c+p,w=s+v,S=Math.sqrt(_*_+b*b+w*w),k=Math.asin(w/=S),E=oa(oa(w)-1)<Aa||oa(r-h)<Aa?(r+h)/2:Math.atan2(b,_),A=n(E,k),C=A[0],N=A[1],L=C-t,z=N-e,q=x*L-y*z;(q*q/M>i||oa((y*L+x*z)/M-.5)>.3||o>a*g+c*p+s*v)&&(u(t,e,r,a,c,s,C,N,E,_/=S,b/=S,w,d,m),m.point(C,N),u(C,N,E,_,b,w,l,f,h,g,p,v,d,m))}}var i=.5,o=Math.cos(30*Na),a=16;return t.precision=function(n){return arguments.length?(a=(i=n*n)>0&&16,t):Math.sqrt(i)},t}function Je(n){var t=We(function(t,e){return n([t*La,e*La])});return function(n){return tr(t(n))}}function Ge(n){this.stream=n}function Ke(n,t){return{point:t,sphere:function(){n.sphere()},lineStart:function(){n.lineStart()},lineEnd:function(){n.lineEnd()},polygonStart:function(){n.polygonStart()},polygonEnd:function(){n.polygonEnd()}}}function Qe(n){return nr(function(){return n})()}function nr(n){function t(n){return n=a(n[0]*Na,n[1]*Na),[n[0]*h+c,s-n[1]*h]}function e(n){return n=a.invert((n[0]-c)/h,(s-n[1])/h),n&&[n[0]*La,n[1]*La]}function r(){a=Ue(o=ur(m,y,x),i);var n=i(v,d);return c=g-n[0]*h,s=p+n[1]*h,u()}function u(){return l&&(l.valid=!1,l=null),t}var i,o,a,c,s,l,f=We(function(n,t){return n=i(n,t),[n[0]*h+c,s-n[1]*h]}),h=150,g=480,p=250,v=0,d=0,m=0,y=0,x=0,M=Ec,_=bt,b=null,w=null;return t.stream=function(n){return l&&(l.valid=!1),l=tr(M(o,f(_(n)))),l.valid=!0,l},t.clipAngle=function(n){return arguments.length?(M=null==n?(b=n,Ec):Re((b=+n)*Na),u()):b
},t.clipExtent=function(n){return arguments.length?(w=n,_=n?Pe(n[0][0],n[0][1],n[1][0],n[1][1]):bt,u()):w},t.scale=function(n){return arguments.length?(h=+n,r()):h},t.translate=function(n){return arguments.length?(g=+n[0],p=+n[1],r()):[g,p]},t.center=function(n){return arguments.length?(v=n[0]%360*Na,d=n[1]%360*Na,r()):[v*La,d*La]},t.rotate=function(n){return arguments.length?(m=n[0]%360*Na,y=n[1]%360*Na,x=n.length>2?n[2]%360*Na:0,r()):[m*La,y*La,x*La]},Xo.rebind(t,f,"precision"),function(){return i=n.apply(this,arguments),t.invert=i.invert&&e,r()}}function tr(n){return Ke(n,function(t,e){n.point(t*Na,e*Na)})}function er(n,t){return[n,t]}function rr(n,t){return[n>Sa?n-ka:-Sa>n?n+ka:n,t]}function ur(n,t,e){return n?t||e?Ue(or(n),ar(t,e)):or(n):t||e?ar(t,e):rr}function ir(n){return function(t,e){return t+=n,[t>Sa?t-ka:-Sa>t?t+ka:t,e]}}function or(n){var t=ir(n);return t.invert=ir(-n),t}function ar(n,t){function e(n,t){var e=Math.cos(t),a=Math.cos(n)*e,c=Math.sin(n)*e,s=Math.sin(t),l=s*r+a*u;return[Math.atan2(c*i-l*o,a*r-s*u),X(l*i+c*o)]}var r=Math.cos(n),u=Math.sin(n),i=Math.cos(t),o=Math.sin(t);return e.invert=function(n,t){var e=Math.cos(t),a=Math.cos(n)*e,c=Math.sin(n)*e,s=Math.sin(t),l=s*i-c*o;return[Math.atan2(c*i+s*o,a*r+l*u),X(l*r-a*u)]},e}function cr(n,t){var e=Math.cos(n),r=Math.sin(n);return function(u,i,o,a){var c=o*t;null!=u?(u=sr(e,u),i=sr(e,i),(o>0?i>u:u>i)&&(u+=o*ka)):(u=n+o*ka,i=n-.5*c);for(var s,l=u;o>0?l>i:i>l;l-=c)a.point((s=ve([e,-r*Math.cos(l),-r*Math.sin(l)]))[0],s[1])}}function sr(n,t){var e=se(t);e[0]-=n,pe(e);var r=V(-e[1]);return((-e[2]<0?-r:r)+2*Math.PI-Aa)%(2*Math.PI)}function lr(n,t,e){var r=Xo.range(n,t-Aa,e).concat(t);return function(n){return r.map(function(t){return[n,t]})}}function fr(n,t,e){var r=Xo.range(n,t-Aa,e).concat(t);return function(n){return r.map(function(t){return[t,n]})}}function hr(n){return n.source}function gr(n){return n.target}function pr(n,t,e,r){var u=Math.cos(t),i=Math.sin(t),o=Math.cos(r),a=Math.sin(r),c=u*Math.cos(n),s=u*Math.sin(n),l=o*Math.cos(e),f=o*Math.sin(e),h=2*Math.asin(Math.sqrt(J(r-t)+u*o*J(e-n))),g=1/Math.sin(h),p=h?function(n){var t=Math.sin(n*=h)*g,e=Math.sin(h-n)*g,r=e*c+t*l,u=e*s+t*f,o=e*i+t*a;return[Math.atan2(u,r)*La,Math.atan2(o,Math.sqrt(r*r+u*u))*La]}:function(){return[n*La,t*La]};return p.distance=h,p}function vr(){function n(n,u){var i=Math.sin(u*=Na),o=Math.cos(u),a=oa((n*=Na)-t),c=Math.cos(a);Uc+=Math.atan2(Math.sqrt((a=o*Math.sin(a))*a+(a=r*i-e*o*c)*a),e*i+r*o*c),t=n,e=i,r=o}var t,e,r;jc.point=function(u,i){t=u*Na,e=Math.sin(i*=Na),r=Math.cos(i),jc.point=n},jc.lineEnd=function(){jc.point=jc.lineEnd=g}}function dr(n,t){function e(t,e){var r=Math.cos(t),u=Math.cos(e),i=n(r*u);return[i*u*Math.sin(t),i*Math.sin(e)]}return e.invert=function(n,e){var r=Math.sqrt(n*n+e*e),u=t(r),i=Math.sin(u),o=Math.cos(u);return[Math.atan2(n*i,r*o),Math.asin(r&&e*i/r)]},e}function mr(n,t){function e(n,t){var e=oa(oa(t)-Ea)<Aa?0:o/Math.pow(u(t),i);return[e*Math.sin(i*n),o-e*Math.cos(i*n)]}var r=Math.cos(n),u=function(n){return Math.tan(Sa/4+n/2)},i=n===t?Math.sin(n):Math.log(r/Math.cos(t))/Math.log(u(t)/u(n)),o=r*Math.pow(u(n),i)/i;return i?(e.invert=function(n,t){var e=o-t,r=I(i)*Math.sqrt(n*n+e*e);return[Math.atan2(n,e)/i,2*Math.atan(Math.pow(o/r,1/i))-Ea]},e):xr}function yr(n,t){function e(n,t){var e=i-t;return[e*Math.sin(u*n),i-e*Math.cos(u*n)]}var r=Math.cos(n),u=n===t?Math.sin(n):(r-Math.cos(t))/(t-n),i=r/u+n;return oa(u)<Aa?er:(e.invert=function(n,t){var e=i-t;return[Math.atan2(n,e)/u,i-I(u)*Math.sqrt(n*n+e*e)]},e)}function xr(n,t){return[n,Math.log(Math.tan(Sa/4+t/2))]}function Mr(n){var t,e=Qe(n),r=e.scale,u=e.translate,i=e.clipExtent;return e.scale=function(){var n=r.apply(e,arguments);return n===e?t?e.clipExtent(null):e:n},e.translate=function(){var n=u.apply(e,arguments);return n===e?t?e.clipExtent(null):e:n},e.clipExtent=function(n){var o=i.apply(e,arguments);if(o===e){if(t=null==n){var a=Sa*r(),c=u();i([[c[0]-a,c[1]-a],[c[0]+a,c[1]+a]])}}else t&&(o=null);return o},e.clipExtent(null)}function _r(n,t){return[Math.log(Math.tan(Sa/4+t/2)),-n]}function br(n){return n[0]}function wr(n){return n[1]}function Sr(n){for(var t=n.length,e=[0,1],r=2,u=2;t>u;u++){for(;r>1&&Z(n[e[r-2]],n[e[r-1]],n[u])<=0;)--r;e[r++]=u}return e.slice(0,r)}function kr(n,t){return n[0]-t[0]||n[1]-t[1]}function Er(n,t,e){return(e[0]-t[0])*(n[1]-t[1])<(e[1]-t[1])*(n[0]-t[0])}function Ar(n,t,e,r){var u=n[0],i=e[0],o=t[0]-u,a=r[0]-i,c=n[1],s=e[1],l=t[1]-c,f=r[1]-s,h=(a*(c-s)-f*(u-i))/(f*o-a*l);return[u+h*o,c+h*l]}function Cr(n){var t=n[0],e=n[n.length-1];return!(t[0]-e[0]||t[1]-e[1])}function Nr(){Jr(this),this.edge=this.site=this.circle=null}function Lr(n){var t=Jc.pop()||new Nr;return t.site=n,t}function zr(n){Or(n),$c.remove(n),Jc.push(n),Jr(n)}function qr(n){var t=n.circle,e=t.x,r=t.cy,u={x:e,y:r},i=n.P,o=n.N,a=[n];zr(n);for(var c=i;c.circle&&oa(e-c.circle.x)<Aa&&oa(r-c.circle.cy)<Aa;)i=c.P,a.unshift(c),zr(c),c=i;a.unshift(c),Or(c);for(var s=o;s.circle&&oa(e-s.circle.x)<Aa&&oa(r-s.circle.cy)<Aa;)o=s.N,a.push(s),zr(s),s=o;a.push(s),Or(s);var l,f=a.length;for(l=1;f>l;++l)s=a[l],c=a[l-1],$r(s.edge,c.site,s.site,u);c=a[0],s=a[f-1],s.edge=Vr(c.site,s.site,null,u),Fr(c),Fr(s)}function Tr(n){for(var t,e,r,u,i=n.x,o=n.y,a=$c._;a;)if(r=Rr(a,o)-i,r>Aa)a=a.L;else{if(u=i-Dr(a,o),!(u>Aa)){r>-Aa?(t=a.P,e=a):u>-Aa?(t=a,e=a.N):t=e=a;break}if(!a.R){t=a;break}a=a.R}var c=Lr(n);if($c.insert(t,c),t||e){if(t===e)return Or(t),e=Lr(t.site),$c.insert(c,e),c.edge=e.edge=Vr(t.site,c.site),Fr(t),Fr(e),void 0;if(!e)return c.edge=Vr(t.site,c.site),void 0;Or(t),Or(e);var s=t.site,l=s.x,f=s.y,h=n.x-l,g=n.y-f,p=e.site,v=p.x-l,d=p.y-f,m=2*(h*d-g*v),y=h*h+g*g,x=v*v+d*d,M={x:(d*y-g*x)/m+l,y:(h*x-v*y)/m+f};$r(e.edge,s,p,M),c.edge=Vr(s,n,null,M),e.edge=Vr(n,p,null,M),Fr(t),Fr(e)}}function Rr(n,t){var e=n.site,r=e.x,u=e.y,i=u-t;if(!i)return r;var o=n.P;if(!o)return-1/0;e=o.site;var a=e.x,c=e.y,s=c-t;if(!s)return a;var l=a-r,f=1/i-1/s,h=l/s;return f?(-h+Math.sqrt(h*h-2*f*(l*l/(-2*s)-c+s/2+u-i/2)))/f+r:(r+a)/2}function Dr(n,t){var e=n.N;if(e)return Rr(e,t);var r=n.site;return r.y===t?r.x:1/0}function Pr(n){this.site=n,this.edges=[]}function Ur(n){for(var t,e,r,u,i,o,a,c,s,l,f=n[0][0],h=n[1][0],g=n[0][1],p=n[1][1],v=Xc,d=v.length;d--;)if(i=v[d],i&&i.prepare())for(a=i.edges,c=a.length,o=0;c>o;)l=a[o].end(),r=l.x,u=l.y,s=a[++o%c].start(),t=s.x,e=s.y,(oa(r-t)>Aa||oa(u-e)>Aa)&&(a.splice(o,0,new Br(Xr(i.site,l,oa(r-f)<Aa&&p-u>Aa?{x:f,y:oa(t-f)<Aa?e:p}:oa(u-p)<Aa&&h-r>Aa?{x:oa(e-p)<Aa?t:h,y:p}:oa(r-h)<Aa&&u-g>Aa?{x:h,y:oa(t-h)<Aa?e:g}:oa(u-g)<Aa&&r-f>Aa?{x:oa(e-g)<Aa?t:f,y:g}:null),i.site,null)),++c)}function jr(n,t){return t.angle-n.angle}function Hr(){Jr(this),this.x=this.y=this.arc=this.site=this.cy=null}function Fr(n){var t=n.P,e=n.N;if(t&&e){var r=t.site,u=n.site,i=e.site;if(r!==i){var o=u.x,a=u.y,c=r.x-o,s=r.y-a,l=i.x-o,f=i.y-a,h=2*(c*f-s*l);if(!(h>=-Ca)){var g=c*c+s*s,p=l*l+f*f,v=(f*g-s*p)/h,d=(c*p-l*g)/h,f=d+a,m=Gc.pop()||new Hr;m.arc=n,m.site=u,m.x=v+o,m.y=f+Math.sqrt(v*v+d*d),m.cy=f,n.circle=m;for(var y=null,x=Wc._;x;)if(m.y<x.y||m.y===x.y&&m.x<=x.x){if(!x.L){y=x.P;break}x=x.L}else{if(!x.R){y=x;break}x=x.R}Wc.insert(y,m),y||(Bc=m)}}}}function Or(n){var t=n.circle;t&&(t.P||(Bc=t.N),Wc.remove(t),Gc.push(t),Jr(t),n.circle=null)}function Yr(n){for(var t,e=Vc,r=De(n[0][0],n[0][1],n[1][0],n[1][1]),u=e.length;u--;)t=e[u],(!Ir(t,n)||!r(t)||oa(t.a.x-t.b.x)<Aa&&oa(t.a.y-t.b.y)<Aa)&&(t.a=t.b=null,e.splice(u,1))}function Ir(n,t){var e=n.b;if(e)return!0;var r,u,i=n.a,o=t[0][0],a=t[1][0],c=t[0][1],s=t[1][1],l=n.l,f=n.r,h=l.x,g=l.y,p=f.x,v=f.y,d=(h+p)/2,m=(g+v)/2;if(v===g){if(o>d||d>=a)return;if(h>p){if(i){if(i.y>=s)return}else i={x:d,y:c};e={x:d,y:s}}else{if(i){if(i.y<c)return}else i={x:d,y:s};e={x:d,y:c}}}else if(r=(h-p)/(v-g),u=m-r*d,-1>r||r>1)if(h>p){if(i){if(i.y>=s)return}else i={x:(c-u)/r,y:c};e={x:(s-u)/r,y:s}}else{if(i){if(i.y<c)return}else i={x:(s-u)/r,y:s};e={x:(c-u)/r,y:c}}else if(v>g){if(i){if(i.x>=a)return}else i={x:o,y:r*o+u};e={x:a,y:r*a+u}}else{if(i){if(i.x<o)return}else i={x:a,y:r*a+u};e={x:o,y:r*o+u}}return n.a=i,n.b=e,!0}function Zr(n,t){this.l=n,this.r=t,this.a=this.b=null}function Vr(n,t,e,r){var u=new Zr(n,t);return Vc.push(u),e&&$r(u,n,t,e),r&&$r(u,t,n,r),Xc[n.i].edges.push(new Br(u,n,t)),Xc[t.i].edges.push(new Br(u,t,n)),u}function Xr(n,t,e){var r=new Zr(n,null);return r.a=t,r.b=e,Vc.push(r),r}function $r(n,t,e,r){n.a||n.b?n.l===e?n.b=r:n.a=r:(n.a=r,n.l=t,n.r=e)}function Br(n,t,e){var r=n.a,u=n.b;this.edge=n,this.site=t,this.angle=e?Math.atan2(e.y-t.y,e.x-t.x):n.l===t?Math.atan2(u.x-r.x,r.y-u.y):Math.atan2(r.x-u.x,u.y-r.y)}function Wr(){this._=null}function Jr(n){n.U=n.C=n.L=n.R=n.P=n.N=null}function Gr(n,t){var e=t,r=t.R,u=e.U;u?u.L===e?u.L=r:u.R=r:n._=r,r.U=u,e.U=r,e.R=r.L,e.R&&(e.R.U=e),r.L=e}function Kr(n,t){var e=t,r=t.L,u=e.U;u?u.L===e?u.L=r:u.R=r:n._=r,r.U=u,e.U=r,e.L=r.R,e.L&&(e.L.U=e),r.R=e}function Qr(n){for(;n.L;)n=n.L;return n}function nu(n,t){var e,r,u,i=n.sort(tu).pop();for(Vc=[],Xc=new Array(n.length),$c=new Wr,Wc=new Wr;;)if(u=Bc,i&&(!u||i.y<u.y||i.y===u.y&&i.x<u.x))(i.x!==e||i.y!==r)&&(Xc[i.i]=new Pr(i),Tr(i),e=i.x,r=i.y),i=n.pop();else{if(!u)break;qr(u.arc)}t&&(Yr(t),Ur(t));var o={cells:Xc,edges:Vc};return $c=Wc=Vc=Xc=null,o}function tu(n,t){return t.y-n.y||t.x-n.x}function eu(n,t,e){return(n.x-e.x)*(t.y-n.y)-(n.x-t.x)*(e.y-n.y)}function ru(n){return n.x}function uu(n){return n.y}function iu(){return{leaf:!0,nodes:[],point:null,x:null,y:null}}function ou(n,t,e,r,u,i){if(!n(t,e,r,u,i)){var o=.5*(e+u),a=.5*(r+i),c=t.nodes;c[0]&&ou(n,c[0],e,r,o,a),c[1]&&ou(n,c[1],o,r,u,a),c[2]&&ou(n,c[2],e,a,o,i),c[3]&&ou(n,c[3],o,a,u,i)}}function au(n,t){n=Xo.rgb(n),t=Xo.rgb(t);var e=n.r,r=n.g,u=n.b,i=t.r-e,o=t.g-r,a=t.b-u;return function(n){return"#"+vt(Math.round(e+i*n))+vt(Math.round(r+o*n))+vt(Math.round(u+a*n))}}function cu(n,t){var e,r={},u={};for(e in n)e in t?r[e]=fu(n[e],t[e]):u[e]=n[e];for(e in t)e in n||(u[e]=t[e]);return function(n){for(e in r)u[e]=r[e](n);return u}}function su(n,t){return t-=n=+n,function(e){return n+t*e}}function lu(n,t){var e,r,u,i,o,a=0,c=0,s=[],l=[];for(n+="",t+="",Qc.lastIndex=0,r=0;e=Qc.exec(t);++r)e.index&&s.push(t.substring(a,c=e.index)),l.push({i:s.length,x:e[0]}),s.push(null),a=Qc.lastIndex;for(a<t.length&&s.push(t.substring(a)),r=0,i=l.length;(e=Qc.exec(n))&&i>r;++r)if(o=l[r],o.x==e[0]){if(o.i)if(null==s[o.i+1])for(s[o.i-1]+=o.x,s.splice(o.i,1),u=r+1;i>u;++u)l[u].i--;else for(s[o.i-1]+=o.x+s[o.i+1],s.splice(o.i,2),u=r+1;i>u;++u)l[u].i-=2;else if(null==s[o.i+1])s[o.i]=o.x;else for(s[o.i]=o.x+s[o.i+1],s.splice(o.i+1,1),u=r+1;i>u;++u)l[u].i--;l.splice(r,1),i--,r--}else o.x=su(parseFloat(e[0]),parseFloat(o.x));for(;i>r;)o=l.pop(),null==s[o.i+1]?s[o.i]=o.x:(s[o.i]=o.x+s[o.i+1],s.splice(o.i+1,1)),i--;return 1===s.length?null==s[0]?(o=l[0].x,function(n){return o(n)+""}):function(){return t}:function(n){for(r=0;i>r;++r)s[(o=l[r]).i]=o.x(n);return s.join("")}}function fu(n,t){for(var e,r=Xo.interpolators.length;--r>=0&&!(e=Xo.interpolators[r](n,t)););return e}function hu(n,t){var e,r=[],u=[],i=n.length,o=t.length,a=Math.min(n.length,t.length);for(e=0;a>e;++e)r.push(fu(n[e],t[e]));for(;i>e;++e)u[e]=n[e];for(;o>e;++e)u[e]=t[e];return function(n){for(e=0;a>e;++e)u[e]=r[e](n);return u}}function gu(n){return function(t){return 0>=t?0:t>=1?1:n(t)}}function pu(n){return function(t){return 1-n(1-t)}}function vu(n){return function(t){return.5*(.5>t?n(2*t):2-n(2-2*t))}}function du(n){return n*n}function mu(n){return n*n*n}function yu(n){if(0>=n)return 0;if(n>=1)return 1;var t=n*n,e=t*n;return 4*(.5>n?e:3*(n-t)+e-.75)}function xu(n){return function(t){return Math.pow(t,n)}}function Mu(n){return 1-Math.cos(n*Ea)}function _u(n){return Math.pow(2,10*(n-1))}function bu(n){return 1-Math.sqrt(1-n*n)}function wu(n,t){var e;return arguments.length<2&&(t=.45),arguments.length?e=t/ka*Math.asin(1/n):(n=1,e=t/4),function(r){return 1+n*Math.pow(2,-10*r)*Math.sin((r-e)*ka/t)}}function Su(n){return n||(n=1.70158),function(t){return t*t*((n+1)*t-n)}}function ku(n){return 1/2.75>n?7.5625*n*n:2/2.75>n?7.5625*(n-=1.5/2.75)*n+.75:2.5/2.75>n?7.5625*(n-=2.25/2.75)*n+.9375:7.5625*(n-=2.625/2.75)*n+.984375}function Eu(n,t){n=Xo.hcl(n),t=Xo.hcl(t);var e=n.h,r=n.c,u=n.l,i=t.h-e,o=t.c-r,a=t.l-u;return isNaN(o)&&(o=0,r=isNaN(r)?t.c:r),isNaN(i)?(i=0,e=isNaN(e)?t.h:e):i>180?i-=360:-180>i&&(i+=360),function(n){return rt(e+i*n,r+o*n,u+a*n)+""}}function Au(n,t){n=Xo.hsl(n),t=Xo.hsl(t);var e=n.h,r=n.s,u=n.l,i=t.h-e,o=t.s-r,a=t.l-u;return isNaN(o)&&(o=0,r=isNaN(r)?t.s:r),isNaN(i)?(i=0,e=isNaN(e)?t.h:e):i>180?i-=360:-180>i&&(i+=360),function(n){return nt(e+i*n,r+o*n,u+a*n)+""}}function Cu(n,t){n=Xo.lab(n),t=Xo.lab(t);var e=n.l,r=n.a,u=n.b,i=t.l-e,o=t.a-r,a=t.b-u;return function(n){return ot(e+i*n,r+o*n,u+a*n)+""}}function Nu(n,t){return t-=n,function(e){return Math.round(n+t*e)}}function Lu(n){var t=[n.a,n.b],e=[n.c,n.d],r=qu(t),u=zu(t,e),i=qu(Tu(e,t,-u))||0;t[0]*e[1]<e[0]*t[1]&&(t[0]*=-1,t[1]*=-1,r*=-1,u*=-1),this.rotate=(r?Math.atan2(t[1],t[0]):Math.atan2(-e[0],e[1]))*La,this.translate=[n.e,n.f],this.scale=[r,i],this.skew=i?Math.atan2(u,i)*La:0}function zu(n,t){return n[0]*t[0]+n[1]*t[1]}function qu(n){var t=Math.sqrt(zu(n,n));return t&&(n[0]/=t,n[1]/=t),t}function Tu(n,t,e){return n[0]+=e*t[0],n[1]+=e*t[1],n}function Ru(n,t){var e,r=[],u=[],i=Xo.transform(n),o=Xo.transform(t),a=i.translate,c=o.translate,s=i.rotate,l=o.rotate,f=i.skew,h=o.skew,g=i.scale,p=o.scale;return a[0]!=c[0]||a[1]!=c[1]?(r.push("translate(",null,",",null,")"),u.push({i:1,x:su(a[0],c[0])},{i:3,x:su(a[1],c[1])})):c[0]||c[1]?r.push("translate("+c+")"):r.push(""),s!=l?(s-l>180?l+=360:l-s>180&&(s+=360),u.push({i:r.push(r.pop()+"rotate(",null,")")-2,x:su(s,l)})):l&&r.push(r.pop()+"rotate("+l+")"),f!=h?u.push({i:r.push(r.pop()+"skewX(",null,")")-2,x:su(f,h)}):h&&r.push(r.pop()+"skewX("+h+")"),g[0]!=p[0]||g[1]!=p[1]?(e=r.push(r.pop()+"scale(",null,",",null,")"),u.push({i:e-4,x:su(g[0],p[0])},{i:e-2,x:su(g[1],p[1])})):(1!=p[0]||1!=p[1])&&r.push(r.pop()+"scale("+p+")"),e=u.length,function(n){for(var t,i=-1;++i<e;)r[(t=u[i]).i]=t.x(n);return r.join("")}}function Du(n,t){return t=t-(n=+n)?1/(t-n):0,function(e){return(e-n)*t}}function Pu(n,t){return t=t-(n=+n)?1/(t-n):0,function(e){return Math.max(0,Math.min(1,(e-n)*t))}}function Uu(n){for(var t=n.source,e=n.target,r=Hu(t,e),u=[t];t!==r;)t=t.parent,u.push(t);for(var i=u.length;e!==r;)u.splice(i,0,e),e=e.parent;return u}function ju(n){for(var t=[],e=n.parent;null!=e;)t.push(n),n=e,e=e.parent;return t.push(n),t}function Hu(n,t){if(n===t)return n;for(var e=ju(n),r=ju(t),u=e.pop(),i=r.pop(),o=null;u===i;)o=u,u=e.pop(),i=r.pop();return o}function Fu(n){n.fixed|=2}function Ou(n){n.fixed&=-7}function Yu(n){n.fixed|=4,n.px=n.x,n.py=n.y}function Iu(n){n.fixed&=-5}function Zu(n,t,e){var r=0,u=0;if(n.charge=0,!n.leaf)for(var i,o=n.nodes,a=o.length,c=-1;++c<a;)i=o[c],null!=i&&(Zu(i,t,e),n.charge+=i.charge,r+=i.charge*i.cx,u+=i.charge*i.cy);if(n.point){n.leaf||(n.point.x+=Math.random()-.5,n.point.y+=Math.random()-.5);var s=t*e[n.point.index];n.charge+=n.pointCharge=s,r+=s*n.point.x,u+=s*n.point.y}n.cx=r/n.charge,n.cy=u/n.charge}function Vu(n,t){return Xo.rebind(n,t,"sort","children","value"),n.nodes=n,n.links=Wu,n}function Xu(n){return n.children}function $u(n){return n.value}function Bu(n,t){return t.value-n.value}function Wu(n){return Xo.merge(n.map(function(n){return(n.children||[]).map(function(t){return{source:n,target:t}})}))}function Ju(n){return n.x}function Gu(n){return n.y}function Ku(n,t,e){n.y0=t,n.y=e}function Qu(n){return Xo.range(n.length)}function ni(n){for(var t=-1,e=n[0].length,r=[];++t<e;)r[t]=0;return r}function ti(n){for(var t,e=1,r=0,u=n[0][1],i=n.length;i>e;++e)(t=n[e][1])>u&&(r=e,u=t);return r}function ei(n){return n.reduce(ri,0)}function ri(n,t){return n+t[1]}function ui(n,t){return ii(n,Math.ceil(Math.log(t.length)/Math.LN2+1))}function ii(n,t){for(var e=-1,r=+n[0],u=(n[1]-r)/t,i=[];++e<=t;)i[e]=u*e+r;return i}function oi(n){return[Xo.min(n),Xo.max(n)]}function ai(n,t){return n.parent==t.parent?1:2}function ci(n){var t=n.children;return t&&t.length?t[0]:n._tree.thread}function si(n){var t,e=n.children;return e&&(t=e.length)?e[t-1]:n._tree.thread}function li(n,t){var e=n.children;if(e&&(u=e.length))for(var r,u,i=-1;++i<u;)t(r=li(e[i],t),n)>0&&(n=r);return n}function fi(n,t){return n.x-t.x}function hi(n,t){return t.x-n.x}function gi(n,t){return n.depth-t.depth}function pi(n,t){function e(n,r){var u=n.children;if(u&&(o=u.length))for(var i,o,a=null,c=-1;++c<o;)i=u[c],e(i,a),a=i;t(n,r)}e(n,null)}function vi(n){for(var t,e=0,r=0,u=n.children,i=u.length;--i>=0;)t=u[i]._tree,t.prelim+=e,t.mod+=e,e+=t.shift+(r+=t.change)}function di(n,t,e){n=n._tree,t=t._tree;var r=e/(t.number-n.number);n.change+=r,t.change-=r,t.shift+=e,t.prelim+=e,t.mod+=e}function mi(n,t,e){return n._tree.ancestor.parent==t.parent?n._tree.ancestor:e}function yi(n,t){return n.value-t.value}function xi(n,t){var e=n._pack_next;n._pack_next=t,t._pack_prev=n,t._pack_next=e,e._pack_prev=t}function Mi(n,t){n._pack_next=t,t._pack_prev=n}function _i(n,t){var e=t.x-n.x,r=t.y-n.y,u=n.r+t.r;return.999*u*u>e*e+r*r}function bi(n){function t(n){l=Math.min(n.x-n.r,l),f=Math.max(n.x+n.r,f),h=Math.min(n.y-n.r,h),g=Math.max(n.y+n.r,g)}if((e=n.children)&&(s=e.length)){var e,r,u,i,o,a,c,s,l=1/0,f=-1/0,h=1/0,g=-1/0;if(e.forEach(wi),r=e[0],r.x=-r.r,r.y=0,t(r),s>1&&(u=e[1],u.x=u.r,u.y=0,t(u),s>2))for(i=e[2],Ei(r,u,i),t(i),xi(r,i),r._pack_prev=i,xi(i,u),u=r._pack_next,o=3;s>o;o++){Ei(r,u,i=e[o]);var p=0,v=1,d=1;for(a=u._pack_next;a!==u;a=a._pack_next,v++)if(_i(a,i)){p=1;break}if(1==p)for(c=r._pack_prev;c!==a._pack_prev&&!_i(c,i);c=c._pack_prev,d++);p?(d>v||v==d&&u.r<r.r?Mi(r,u=a):Mi(r=c,u),o--):(xi(r,i),u=i,t(i))}var m=(l+f)/2,y=(h+g)/2,x=0;for(o=0;s>o;o++)i=e[o],i.x-=m,i.y-=y,x=Math.max(x,i.r+Math.sqrt(i.x*i.x+i.y*i.y));n.r=x,e.forEach(Si)}}function wi(n){n._pack_next=n._pack_prev=n}function Si(n){delete n._pack_next,delete n._pack_prev}function ki(n,t,e,r){var u=n.children;if(n.x=t+=r*n.x,n.y=e+=r*n.y,n.r*=r,u)for(var i=-1,o=u.length;++i<o;)ki(u[i],t,e,r)}function Ei(n,t,e){var r=n.r+e.r,u=t.x-n.x,i=t.y-n.y;if(r&&(u||i)){var o=t.r+e.r,a=u*u+i*i;o*=o,r*=r;var c=.5+(r-o)/(2*a),s=Math.sqrt(Math.max(0,2*o*(r+a)-(r-=a)*r-o*o))/(2*a);e.x=n.x+c*u+s*i,e.y=n.y+c*i-s*u}else e.x=n.x+r,e.y=n.y}function Ai(n){return 1+Xo.max(n,function(n){return n.y})}function Ci(n){return n.reduce(function(n,t){return n+t.x},0)/n.length}function Ni(n){var t=n.children;return t&&t.length?Ni(t[0]):n}function Li(n){var t,e=n.children;return e&&(t=e.length)?Li(e[t-1]):n}function zi(n){return{x:n.x,y:n.y,dx:n.dx,dy:n.dy}}function qi(n,t){var e=n.x+t[3],r=n.y+t[0],u=n.dx-t[1]-t[3],i=n.dy-t[0]-t[2];return 0>u&&(e+=u/2,u=0),0>i&&(r+=i/2,i=0),{x:e,y:r,dx:u,dy:i}}function Ti(n){var t=n[0],e=n[n.length-1];return e>t?[t,e]:[e,t]}function Ri(n){return n.rangeExtent?n.rangeExtent():Ti(n.range())}function Di(n,t,e,r){var u=e(n[0],n[1]),i=r(t[0],t[1]);return function(n){return i(u(n))}}function Pi(n,t){var e,r=0,u=n.length-1,i=n[r],o=n[u];return i>o&&(e=r,r=u,u=e,e=i,i=o,o=e),n[r]=t.floor(i),n[u]=t.ceil(o),n}function Ui(n){return n?{floor:function(t){return Math.floor(t/n)*n},ceil:function(t){return Math.ceil(t/n)*n}}:ls}function ji(n,t,e,r){var u=[],i=[],o=0,a=Math.min(n.length,t.length)-1;for(n[a]<n[0]&&(n=n.slice().reverse(),t=t.slice().reverse());++o<=a;)u.push(e(n[o-1],n[o])),i.push(r(t[o-1],t[o]));return function(t){var e=Xo.bisect(n,t,1,a)-1;return i[e](u[e](t))}}function Hi(n,t,e,r){function u(){var u=Math.min(n.length,t.length)>2?ji:Di,c=r?Pu:Du;return o=u(n,t,c,e),a=u(t,n,c,fu),i}function i(n){return o(n)}var o,a;return i.invert=function(n){return a(n)},i.domain=function(t){return arguments.length?(n=t.map(Number),u()):n},i.range=function(n){return arguments.length?(t=n,u()):t},i.rangeRound=function(n){return i.range(n).interpolate(Nu)},i.clamp=function(n){return arguments.length?(r=n,u()):r},i.interpolate=function(n){return arguments.length?(e=n,u()):e},i.ticks=function(t){return Ii(n,t)},i.tickFormat=function(t,e){return Zi(n,t,e)},i.nice=function(t){return Oi(n,t),u()},i.copy=function(){return Hi(n,t,e,r)},u()}function Fi(n,t){return Xo.rebind(n,t,"range","rangeRound","interpolate","clamp")}function Oi(n,t){return Pi(n,Ui(Yi(n,t)[2]))}function Yi(n,t){null==t&&(t=10);var e=Ti(n),r=e[1]-e[0],u=Math.pow(10,Math.floor(Math.log(r/t)/Math.LN10)),i=t/r*u;return.15>=i?u*=10:.35>=i?u*=5:.75>=i&&(u*=2),e[0]=Math.ceil(e[0]/u)*u,e[1]=Math.floor(e[1]/u)*u+.5*u,e[2]=u,e}function Ii(n,t){return Xo.range.apply(Xo,Yi(n,t))}function Zi(n,t,e){var r=Yi(n,t);return Xo.format(e?e.replace(Qa,function(n,t,e,u,i,o,a,c,s,l){return[t,e,u,i,o,a,c,s||"."+Xi(l,r),l].join("")}):",."+Vi(r[2])+"f")}function Vi(n){return-Math.floor(Math.log(n)/Math.LN10+.01)}function Xi(n,t){var e=Vi(t[2]);return n in fs?Math.abs(e-Vi(Math.max(Math.abs(t[0]),Math.abs(t[1]))))+ +("e"!==n):e-2*("%"===n)}function $i(n,t,e,r){function u(n){return(e?Math.log(0>n?0:n):-Math.log(n>0?0:-n))/Math.log(t)}function i(n){return e?Math.pow(t,n):-Math.pow(t,-n)}function o(t){return n(u(t))}return o.invert=function(t){return i(n.invert(t))},o.domain=function(t){return arguments.length?(e=t[0]>=0,n.domain((r=t.map(Number)).map(u)),o):r},o.base=function(e){return arguments.length?(t=+e,n.domain(r.map(u)),o):t},o.nice=function(){var t=Pi(r.map(u),e?Math:gs);return n.domain(t),r=t.map(i),o},o.ticks=function(){var n=Ti(r),o=[],a=n[0],c=n[1],s=Math.floor(u(a)),l=Math.ceil(u(c)),f=t%1?2:t;if(isFinite(l-s)){if(e){for(;l>s;s++)for(var h=1;f>h;h++)o.push(i(s)*h);o.push(i(s))}else for(o.push(i(s));s++<l;)for(var h=f-1;h>0;h--)o.push(i(s)*h);for(s=0;o[s]<a;s++);for(l=o.length;o[l-1]>c;l--);o=o.slice(s,l)}return o},o.tickFormat=function(n,t){if(!arguments.length)return hs;arguments.length<2?t=hs:"function"!=typeof t&&(t=Xo.format(t));var r,a=Math.max(.1,n/o.ticks().length),c=e?(r=1e-12,Math.ceil):(r=-1e-12,Math.floor);return function(n){return n/i(c(u(n)+r))<=a?t(n):""}},o.copy=function(){return $i(n.copy(),t,e,r)},Fi(o,n)}function Bi(n,t,e){function r(t){return n(u(t))}var u=Wi(t),i=Wi(1/t);return r.invert=function(t){return i(n.invert(t))},r.domain=function(t){return arguments.length?(n.domain((e=t.map(Number)).map(u)),r):e},r.ticks=function(n){return Ii(e,n)},r.tickFormat=function(n,t){return Zi(e,n,t)},r.nice=function(n){return r.domain(Oi(e,n))},r.exponent=function(o){return arguments.length?(u=Wi(t=o),i=Wi(1/t),n.domain(e.map(u)),r):t},r.copy=function(){return Bi(n.copy(),t,e)},Fi(r,n)}function Wi(n){return function(t){return 0>t?-Math.pow(-t,n):Math.pow(t,n)}}function Ji(n,t){function e(e){return o[((i.get(e)||"range"===t.t&&i.set(e,n.push(e)))-1)%o.length]}function r(t,e){return Xo.range(n.length).map(function(n){return t+e*n})}var i,o,a;return e.domain=function(r){if(!arguments.length)return n;n=[],i=new u;for(var o,a=-1,c=r.length;++a<c;)i.has(o=r[a])||i.set(o,n.push(o));return e[t.t].apply(e,t.a)},e.range=function(n){return arguments.length?(o=n,a=0,t={t:"range",a:arguments},e):o},e.rangePoints=function(u,i){arguments.length<2&&(i=0);var c=u[0],s=u[1],l=(s-c)/(Math.max(1,n.length-1)+i);return o=r(n.length<2?(c+s)/2:c+l*i/2,l),a=0,t={t:"rangePoints",a:arguments},e},e.rangeBands=function(u,i,c){arguments.length<2&&(i=0),arguments.length<3&&(c=i);var s=u[1]<u[0],l=u[s-0],f=u[1-s],h=(f-l)/(n.length-i+2*c);return o=r(l+h*c,h),s&&o.reverse(),a=h*(1-i),t={t:"rangeBands",a:arguments},e},e.rangeRoundBands=function(u,i,c){arguments.length<2&&(i=0),arguments.length<3&&(c=i);var s=u[1]<u[0],l=u[s-0],f=u[1-s],h=Math.floor((f-l)/(n.length-i+2*c)),g=f-l-(n.length-i)*h;return o=r(l+Math.round(g/2),h),s&&o.reverse(),a=Math.round(h*(1-i)),t={t:"rangeRoundBands",a:arguments},e},e.rangeBand=function(){return a},e.rangeExtent=function(){return Ti(t.a[0])},e.copy=function(){return Ji(n,t)},e.domain(n)}function Gi(n,t){function e(){var e=0,i=t.length;for(u=[];++e<i;)u[e-1]=Xo.quantile(n,e/i);return r}function r(n){return isNaN(n=+n)?void 0:t[Xo.bisect(u,n)]}var u;return r.domain=function(t){return arguments.length?(n=t.filter(function(n){return!isNaN(n)}).sort(Xo.ascending),e()):n},r.range=function(n){return arguments.length?(t=n,e()):t},r.quantiles=function(){return u},r.invertExtent=function(e){return e=t.indexOf(e),0>e?[0/0,0/0]:[e>0?u[e-1]:n[0],e<u.length?u[e]:n[n.length-1]]},r.copy=function(){return Gi(n,t)},e()}function Ki(n,t,e){function r(t){return e[Math.max(0,Math.min(o,Math.floor(i*(t-n))))]}function u(){return i=e.length/(t-n),o=e.length-1,r}var i,o;return r.domain=function(e){return arguments.length?(n=+e[0],t=+e[e.length-1],u()):[n,t]},r.range=function(n){return arguments.length?(e=n,u()):e},r.invertExtent=function(t){return t=e.indexOf(t),t=0>t?0/0:t/i+n,[t,t+1/i]},r.copy=function(){return Ki(n,t,e)},u()}function Qi(n,t){function e(e){return e>=e?t[Xo.bisect(n,e)]:void 0}return e.domain=function(t){return arguments.length?(n=t,e):n},e.range=function(n){return arguments.length?(t=n,e):t},e.invertExtent=function(e){return e=t.indexOf(e),[n[e-1],n[e]]},e.copy=function(){return Qi(n,t)},e}function no(n){function t(n){return+n}return t.invert=t,t.domain=t.range=function(e){return arguments.length?(n=e.map(t),t):n},t.ticks=function(t){return Ii(n,t)},t.tickFormat=function(t,e){return Zi(n,t,e)},t.copy=function(){return no(n)},t}function to(n){return n.innerRadius}function eo(n){return n.outerRadius}function ro(n){return n.startAngle}function uo(n){return n.endAngle}function io(n){function t(t){function o(){s.push("M",i(n(l),a))}for(var c,s=[],l=[],f=-1,h=t.length,g=_t(e),p=_t(r);++f<h;)u.call(this,c=t[f],f)?l.push([+g.call(this,c,f),+p.call(this,c,f)]):l.length&&(o(),l=[]);return l.length&&o(),s.length?s.join(""):null}var e=br,r=wr,u=be,i=oo,o=i.key,a=.7;return t.x=function(n){return arguments.length?(e=n,t):e},t.y=function(n){return arguments.length?(r=n,t):r},t.defined=function(n){return arguments.length?(u=n,t):u},t.interpolate=function(n){return arguments.length?(o="function"==typeof n?i=n:(i=Ms.get(n)||oo).key,t):o},t.tension=function(n){return arguments.length?(a=n,t):a},t}function oo(n){return n.join("L")}function ao(n){return oo(n)+"Z"}function co(n){for(var t=0,e=n.length,r=n[0],u=[r[0],",",r[1]];++t<e;)u.push("H",(r[0]+(r=n[t])[0])/2,"V",r[1]);return e>1&&u.push("H",r[0]),u.join("")}function so(n){for(var t=0,e=n.length,r=n[0],u=[r[0],",",r[1]];++t<e;)u.push("V",(r=n[t])[1],"H",r[0]);return u.join("")}function lo(n){for(var t=0,e=n.length,r=n[0],u=[r[0],",",r[1]];++t<e;)u.push("H",(r=n[t])[0],"V",r[1]);return u.join("")}function fo(n,t){return n.length<4?oo(n):n[1]+po(n.slice(1,n.length-1),vo(n,t))}function ho(n,t){return n.length<3?oo(n):n[0]+po((n.push(n[0]),n),vo([n[n.length-2]].concat(n,[n[1]]),t))}function go(n,t){return n.length<3?oo(n):n[0]+po(n,vo(n,t))}function po(n,t){if(t.length<1||n.length!=t.length&&n.length!=t.length+2)return oo(n);var e=n.length!=t.length,r="",u=n[0],i=n[1],o=t[0],a=o,c=1;if(e&&(r+="Q"+(i[0]-2*o[0]/3)+","+(i[1]-2*o[1]/3)+","+i[0]+","+i[1],u=n[1],c=2),t.length>1){a=t[1],i=n[c],c++,r+="C"+(u[0]+o[0])+","+(u[1]+o[1])+","+(i[0]-a[0])+","+(i[1]-a[1])+","+i[0]+","+i[1];for(var s=2;s<t.length;s++,c++)i=n[c],a=t[s],r+="S"+(i[0]-a[0])+","+(i[1]-a[1])+","+i[0]+","+i[1]}if(e){var l=n[c];r+="Q"+(i[0]+2*a[0]/3)+","+(i[1]+2*a[1]/3)+","+l[0]+","+l[1]}return r}function vo(n,t){for(var e,r=[],u=(1-t)/2,i=n[0],o=n[1],a=1,c=n.length;++a<c;)e=i,i=o,o=n[a],r.push([u*(o[0]-e[0]),u*(o[1]-e[1])]);return r}function mo(n){if(n.length<3)return oo(n);var t=1,e=n.length,r=n[0],u=r[0],i=r[1],o=[u,u,u,(r=n[1])[0]],a=[i,i,i,r[1]],c=[u,",",i,"L",_o(ws,o),",",_o(ws,a)];for(n.push(n[e-1]);++t<=e;)r=n[t],o.shift(),o.push(r[0]),a.shift(),a.push(r[1]),bo(c,o,a);return n.pop(),c.push("L",r),c.join("")}function yo(n){if(n.length<4)return oo(n);for(var t,e=[],r=-1,u=n.length,i=[0],o=[0];++r<3;)t=n[r],i.push(t[0]),o.push(t[1]);for(e.push(_o(ws,i)+","+_o(ws,o)),--r;++r<u;)t=n[r],i.shift(),i.push(t[0]),o.shift(),o.push(t[1]),bo(e,i,o);return e.join("")}function xo(n){for(var t,e,r=-1,u=n.length,i=u+4,o=[],a=[];++r<4;)e=n[r%u],o.push(e[0]),a.push(e[1]);for(t=[_o(ws,o),",",_o(ws,a)],--r;++r<i;)e=n[r%u],o.shift(),o.push(e[0]),a.shift(),a.push(e[1]),bo(t,o,a);return t.join("")}function Mo(n,t){var e=n.length-1;if(e)for(var r,u,i=n[0][0],o=n[0][1],a=n[e][0]-i,c=n[e][1]-o,s=-1;++s<=e;)r=n[s],u=s/e,r[0]=t*r[0]+(1-t)*(i+u*a),r[1]=t*r[1]+(1-t)*(o+u*c);return mo(n)}function _o(n,t){return n[0]*t[0]+n[1]*t[1]+n[2]*t[2]+n[3]*t[3]}function bo(n,t,e){n.push("C",_o(_s,t),",",_o(_s,e),",",_o(bs,t),",",_o(bs,e),",",_o(ws,t),",",_o(ws,e))}function wo(n,t){return(t[1]-n[1])/(t[0]-n[0])}function So(n){for(var t=0,e=n.length-1,r=[],u=n[0],i=n[1],o=r[0]=wo(u,i);++t<e;)r[t]=(o+(o=wo(u=i,i=n[t+1])))/2;return r[t]=o,r}function ko(n){for(var t,e,r,u,i=[],o=So(n),a=-1,c=n.length-1;++a<c;)t=wo(n[a],n[a+1]),oa(t)<Aa?o[a]=o[a+1]=0:(e=o[a]/t,r=o[a+1]/t,u=e*e+r*r,u>9&&(u=3*t/Math.sqrt(u),o[a]=u*e,o[a+1]=u*r));for(a=-1;++a<=c;)u=(n[Math.min(c,a+1)][0]-n[Math.max(0,a-1)][0])/(6*(1+o[a]*o[a])),i.push([u||0,o[a]*u||0]);return i}function Eo(n){return n.length<3?oo(n):n[0]+po(n,ko(n))}function Ao(n){for(var t,e,r,u=-1,i=n.length;++u<i;)t=n[u],e=t[0],r=t[1]+ys,t[0]=e*Math.cos(r),t[1]=e*Math.sin(r);return n}function Co(n){function t(t){function c(){v.push("M",a(n(m),f),l,s(n(d.reverse()),f),"Z")}for(var h,g,p,v=[],d=[],m=[],y=-1,x=t.length,M=_t(e),_=_t(u),b=e===r?function(){return g}:_t(r),w=u===i?function(){return p}:_t(i);++y<x;)o.call(this,h=t[y],y)?(d.push([g=+M.call(this,h,y),p=+_.call(this,h,y)]),m.push([+b.call(this,h,y),+w.call(this,h,y)])):d.length&&(c(),d=[],m=[]);return d.length&&c(),v.length?v.join(""):null}var e=br,r=br,u=0,i=wr,o=be,a=oo,c=a.key,s=a,l="L",f=.7;return t.x=function(n){return arguments.length?(e=r=n,t):r},t.x0=function(n){return arguments.length?(e=n,t):e},t.x1=function(n){return arguments.length?(r=n,t):r},t.y=function(n){return arguments.length?(u=i=n,t):i},t.y0=function(n){return arguments.length?(u=n,t):u},t.y1=function(n){return arguments.length?(i=n,t):i},t.defined=function(n){return arguments.length?(o=n,t):o},t.interpolate=function(n){return arguments.length?(c="function"==typeof n?a=n:(a=Ms.get(n)||oo).key,s=a.reverse||a,l=a.closed?"M":"L",t):c},t.tension=function(n){return arguments.length?(f=n,t):f},t}function No(n){return n.radius}function Lo(n){return[n.x,n.y]}function zo(n){return function(){var t=n.apply(this,arguments),e=t[0],r=t[1]+ys;return[e*Math.cos(r),e*Math.sin(r)]}}function qo(){return 64}function To(){return"circle"}function Ro(n){var t=Math.sqrt(n/Sa);return"M0,"+t+"A"+t+","+t+" 0 1,1 0,"+-t+"A"+t+","+t+" 0 1,1 0,"+t+"Z"}function Do(n,t){return fa(n,Ns),n.id=t,n}function Po(n,t,e,r){var u=n.id;return R(n,"function"==typeof e?function(n,i,o){n.__transition__[u].tween.set(t,r(e.call(n,n.__data__,i,o)))}:(e=r(e),function(n){n.__transition__[u].tween.set(t,e)}))}function Uo(n){return null==n&&(n=""),function(){this.textContent=n}}function jo(n,t,e,r){var i=n.__transition__||(n.__transition__={active:0,count:0}),o=i[e];if(!o){var a=r.time;o=i[e]={tween:new u,time:a,ease:r.ease,delay:r.delay,duration:r.duration},++i.count,Xo.timer(function(r){function u(r){return i.active>e?s():(i.active=e,o.event&&o.event.start.call(n,l,t),o.tween.forEach(function(e,r){(r=r.call(n,l,t))&&v.push(r)}),Xo.timer(function(){return p.c=c(r||1)?be:c,1},0,a),void 0)}function c(r){if(i.active!==e)return s();for(var u=r/g,a=f(u),c=v.length;c>0;)v[--c].call(n,a);return u>=1?(o.event&&o.event.end.call(n,l,t),s()):void 0}function s(){return--i.count?delete i[e]:delete n.__transition__,1}var l=n.__data__,f=o.ease,h=o.delay,g=o.duration,p=Ja,v=[];return p.t=h+a,r>=h?u(r-h):(p.c=u,void 0)},0,a)}}function Ho(n,t){n.attr("transform",function(n){return"translate("+t(n)+",0)"})}function Fo(n,t){n.attr("transform",function(n){return"translate(0,"+t(n)+")"})}function Oo(n){return n.toISOString()}function Yo(n,t,e){function r(t){return n(t)}function u(n,e){var r=n[1]-n[0],u=r/e,i=Xo.bisect(js,u);return i==js.length?[t.year,Yi(n.map(function(n){return n/31536e6}),e)[2]]:i?t[u/js[i-1]<js[i]/u?i-1:i]:[Os,Yi(n,e)[2]]
}return r.invert=function(t){return Io(n.invert(t))},r.domain=function(t){return arguments.length?(n.domain(t),r):n.domain().map(Io)},r.nice=function(n,t){function e(e){return!isNaN(e)&&!n.range(e,Io(+e+1),t).length}var i=r.domain(),o=Ti(i),a=null==n?u(o,10):"number"==typeof n&&u(o,n);return a&&(n=a[0],t=a[1]),r.domain(Pi(i,t>1?{floor:function(t){for(;e(t=n.floor(t));)t=Io(t-1);return t},ceil:function(t){for(;e(t=n.ceil(t));)t=Io(+t+1);return t}}:n))},r.ticks=function(n,t){var e=Ti(r.domain()),i=null==n?u(e,10):"number"==typeof n?u(e,n):!n.range&&[{range:n},t];return i&&(n=i[0],t=i[1]),n.range(e[0],Io(+e[1]+1),1>t?1:t)},r.tickFormat=function(){return e},r.copy=function(){return Yo(n.copy(),t,e)},Fi(r,n)}function Io(n){return new Date(n)}function Zo(n){return JSON.parse(n.responseText)}function Vo(n){var t=Wo.createRange();return t.selectNode(Wo.body),t.createContextualFragment(n.responseText)}var Xo={version:"3.4.2"};Date.now||(Date.now=function(){return+new Date});var $o=[].slice,Bo=function(n){return $o.call(n)},Wo=document,Jo=Wo.documentElement,Go=window;try{Bo(Jo.childNodes)[0].nodeType}catch(Ko){Bo=function(n){for(var t=n.length,e=new Array(t);t--;)e[t]=n[t];return e}}try{Wo.createElement("div").style.setProperty("opacity",0,"")}catch(Qo){var na=Go.Element.prototype,ta=na.setAttribute,ea=na.setAttributeNS,ra=Go.CSSStyleDeclaration.prototype,ua=ra.setProperty;na.setAttribute=function(n,t){ta.call(this,n,t+"")},na.setAttributeNS=function(n,t,e){ea.call(this,n,t,e+"")},ra.setProperty=function(n,t,e){ua.call(this,n,t+"",e)}}Xo.ascending=function(n,t){return t>n?-1:n>t?1:n>=t?0:0/0},Xo.descending=function(n,t){return n>t?-1:t>n?1:t>=n?0:0/0},Xo.min=function(n,t){var e,r,u=-1,i=n.length;if(1===arguments.length){for(;++u<i&&!(null!=(e=n[u])&&e>=e);)e=void 0;for(;++u<i;)null!=(r=n[u])&&e>r&&(e=r)}else{for(;++u<i&&!(null!=(e=t.call(n,n[u],u))&&e>=e);)e=void 0;for(;++u<i;)null!=(r=t.call(n,n[u],u))&&e>r&&(e=r)}return e},Xo.max=function(n,t){var e,r,u=-1,i=n.length;if(1===arguments.length){for(;++u<i&&!(null!=(e=n[u])&&e>=e);)e=void 0;for(;++u<i;)null!=(r=n[u])&&r>e&&(e=r)}else{for(;++u<i&&!(null!=(e=t.call(n,n[u],u))&&e>=e);)e=void 0;for(;++u<i;)null!=(r=t.call(n,n[u],u))&&r>e&&(e=r)}return e},Xo.extent=function(n,t){var e,r,u,i=-1,o=n.length;if(1===arguments.length){for(;++i<o&&!(null!=(e=u=n[i])&&e>=e);)e=u=void 0;for(;++i<o;)null!=(r=n[i])&&(e>r&&(e=r),r>u&&(u=r))}else{for(;++i<o&&!(null!=(e=u=t.call(n,n[i],i))&&e>=e);)e=void 0;for(;++i<o;)null!=(r=t.call(n,n[i],i))&&(e>r&&(e=r),r>u&&(u=r))}return[e,u]},Xo.sum=function(n,t){var e,r=0,u=n.length,i=-1;if(1===arguments.length)for(;++i<u;)isNaN(e=+n[i])||(r+=e);else for(;++i<u;)isNaN(e=+t.call(n,n[i],i))||(r+=e);return r},Xo.mean=function(t,e){var r,u=t.length,i=0,o=-1,a=0;if(1===arguments.length)for(;++o<u;)n(r=t[o])&&(i+=(r-i)/++a);else for(;++o<u;)n(r=e.call(t,t[o],o))&&(i+=(r-i)/++a);return a?i:void 0},Xo.quantile=function(n,t){var e=(n.length-1)*t+1,r=Math.floor(e),u=+n[r-1],i=e-r;return i?u+i*(n[r]-u):u},Xo.median=function(t,e){return arguments.length>1&&(t=t.map(e)),t=t.filter(n),t.length?Xo.quantile(t.sort(Xo.ascending),.5):void 0},Xo.bisector=function(n){return{left:function(t,e,r,u){for(arguments.length<3&&(r=0),arguments.length<4&&(u=t.length);u>r;){var i=r+u>>>1;n.call(t,t[i],i)<e?r=i+1:u=i}return r},right:function(t,e,r,u){for(arguments.length<3&&(r=0),arguments.length<4&&(u=t.length);u>r;){var i=r+u>>>1;e<n.call(t,t[i],i)?u=i:r=i+1}return r}}};var ia=Xo.bisector(function(n){return n});Xo.bisectLeft=ia.left,Xo.bisect=Xo.bisectRight=ia.right,Xo.shuffle=function(n){for(var t,e,r=n.length;r;)e=0|Math.random()*r--,t=n[r],n[r]=n[e],n[e]=t;return n},Xo.permute=function(n,t){for(var e=t.length,r=new Array(e);e--;)r[e]=n[t[e]];return r},Xo.pairs=function(n){for(var t,e=0,r=n.length-1,u=n[0],i=new Array(0>r?0:r);r>e;)i[e]=[t=u,u=n[++e]];return i},Xo.zip=function(){if(!(u=arguments.length))return[];for(var n=-1,e=Xo.min(arguments,t),r=new Array(e);++n<e;)for(var u,i=-1,o=r[n]=new Array(u);++i<u;)o[i]=arguments[i][n];return r},Xo.transpose=function(n){return Xo.zip.apply(Xo,n)},Xo.keys=function(n){var t=[];for(var e in n)t.push(e);return t},Xo.values=function(n){var t=[];for(var e in n)t.push(n[e]);return t},Xo.entries=function(n){var t=[];for(var e in n)t.push({key:e,value:n[e]});return t},Xo.merge=function(n){for(var t,e,r,u=n.length,i=-1,o=0;++i<u;)o+=n[i].length;for(e=new Array(o);--u>=0;)for(r=n[u],t=r.length;--t>=0;)e[--o]=r[t];return e};var oa=Math.abs;Xo.range=function(n,t,r){if(arguments.length<3&&(r=1,arguments.length<2&&(t=n,n=0)),1/0===(t-n)/r)throw new Error("infinite range");var u,i=[],o=e(oa(r)),a=-1;if(n*=o,t*=o,r*=o,0>r)for(;(u=n+r*++a)>t;)i.push(u/o);else for(;(u=n+r*++a)<t;)i.push(u/o);return i},Xo.map=function(n){var t=new u;if(n instanceof u)n.forEach(function(n,e){t.set(n,e)});else for(var e in n)t.set(e,n[e]);return t},r(u,{has:i,get:function(n){return this[aa+n]},set:function(n,t){return this[aa+n]=t},remove:o,keys:a,values:function(){var n=[];return this.forEach(function(t,e){n.push(e)}),n},entries:function(){var n=[];return this.forEach(function(t,e){n.push({key:t,value:e})}),n},size:c,empty:s,forEach:function(n){for(var t in this)t.charCodeAt(0)===ca&&n.call(this,t.substring(1),this[t])}});var aa="\x00",ca=aa.charCodeAt(0);Xo.nest=function(){function n(t,a,c){if(c>=o.length)return r?r.call(i,a):e?a.sort(e):a;for(var s,l,f,h,g=-1,p=a.length,v=o[c++],d=new u;++g<p;)(h=d.get(s=v(l=a[g])))?h.push(l):d.set(s,[l]);return t?(l=t(),f=function(e,r){l.set(e,n(t,r,c))}):(l={},f=function(e,r){l[e]=n(t,r,c)}),d.forEach(f),l}function t(n,e){if(e>=o.length)return n;var r=[],u=a[e++];return n.forEach(function(n,u){r.push({key:n,values:t(u,e)})}),u?r.sort(function(n,t){return u(n.key,t.key)}):r}var e,r,i={},o=[],a=[];return i.map=function(t,e){return n(e,t,0)},i.entries=function(e){return t(n(Xo.map,e,0),0)},i.key=function(n){return o.push(n),i},i.sortKeys=function(n){return a[o.length-1]=n,i},i.sortValues=function(n){return e=n,i},i.rollup=function(n){return r=n,i},i},Xo.set=function(n){var t=new l;if(n)for(var e=0,r=n.length;r>e;++e)t.add(n[e]);return t},r(l,{has:i,add:function(n){return this[aa+n]=!0,n},remove:function(n){return n=aa+n,n in this&&delete this[n]},values:a,size:c,empty:s,forEach:function(n){for(var t in this)t.charCodeAt(0)===ca&&n.call(this,t.substring(1))}}),Xo.behavior={},Xo.rebind=function(n,t){for(var e,r=1,u=arguments.length;++r<u;)n[e=arguments[r]]=f(n,t,t[e]);return n};var sa=["webkit","ms","moz","Moz","o","O"];Xo.dispatch=function(){for(var n=new p,t=-1,e=arguments.length;++t<e;)n[arguments[t]]=v(n);return n},p.prototype.on=function(n,t){var e=n.indexOf("."),r="";if(e>=0&&(r=n.substring(e+1),n=n.substring(0,e)),n)return arguments.length<2?this[n].on(r):this[n].on(r,t);if(2===arguments.length){if(null==t)for(n in this)this.hasOwnProperty(n)&&this[n].on(r,null);return this}},Xo.event=null,Xo.requote=function(n){return n.replace(la,"\\$&")};var la=/[\\\^\$\*\+\?\|\[\]\(\)\.\{\}]/g,fa={}.__proto__?function(n,t){n.__proto__=t}:function(n,t){for(var e in t)n[e]=t[e]},ha=function(n,t){return t.querySelector(n)},ga=function(n,t){return t.querySelectorAll(n)},pa=Jo[h(Jo,"matchesSelector")],va=function(n,t){return pa.call(n,t)};"function"==typeof Sizzle&&(ha=function(n,t){return Sizzle(n,t)[0]||null},ga=function(n,t){return Sizzle.uniqueSort(Sizzle(n,t))},va=Sizzle.matchesSelector),Xo.selection=function(){return xa};var da=Xo.selection.prototype=[];da.select=function(n){var t,e,r,u,i=[];n=M(n);for(var o=-1,a=this.length;++o<a;){i.push(t=[]),t.parentNode=(r=this[o]).parentNode;for(var c=-1,s=r.length;++c<s;)(u=r[c])?(t.push(e=n.call(u,u.__data__,c,o)),e&&"__data__"in u&&(e.__data__=u.__data__)):t.push(null)}return x(i)},da.selectAll=function(n){var t,e,r=[];n=_(n);for(var u=-1,i=this.length;++u<i;)for(var o=this[u],a=-1,c=o.length;++a<c;)(e=o[a])&&(r.push(t=Bo(n.call(e,e.__data__,a,u))),t.parentNode=e);return x(r)};var ma={svg:"http://www.w3.org/2000/svg",xhtml:"http://www.w3.org/1999/xhtml",xlink:"http://www.w3.org/1999/xlink",xml:"http://www.w3.org/XML/1998/namespace",xmlns:"http://www.w3.org/2000/xmlns/"};Xo.ns={prefix:ma,qualify:function(n){var t=n.indexOf(":"),e=n;return t>=0&&(e=n.substring(0,t),n=n.substring(t+1)),ma.hasOwnProperty(e)?{space:ma[e],local:n}:n}},da.attr=function(n,t){if(arguments.length<2){if("string"==typeof n){var e=this.node();return n=Xo.ns.qualify(n),n.local?e.getAttributeNS(n.space,n.local):e.getAttribute(n)}for(t in n)this.each(b(t,n[t]));return this}return this.each(b(n,t))},da.classed=function(n,t){if(arguments.length<2){if("string"==typeof n){var e=this.node(),r=(n=k(n)).length,u=-1;if(t=e.classList){for(;++u<r;)if(!t.contains(n[u]))return!1}else for(t=e.getAttribute("class");++u<r;)if(!S(n[u]).test(t))return!1;return!0}for(t in n)this.each(E(t,n[t]));return this}return this.each(E(n,t))},da.style=function(n,t,e){var r=arguments.length;if(3>r){if("string"!=typeof n){2>r&&(t="");for(e in n)this.each(C(e,n[e],t));return this}if(2>r)return Go.getComputedStyle(this.node(),null).getPropertyValue(n);e=""}return this.each(C(n,t,e))},da.property=function(n,t){if(arguments.length<2){if("string"==typeof n)return this.node()[n];for(t in n)this.each(N(t,n[t]));return this}return this.each(N(n,t))},da.text=function(n){return arguments.length?this.each("function"==typeof n?function(){var t=n.apply(this,arguments);this.textContent=null==t?"":t}:null==n?function(){this.textContent=""}:function(){this.textContent=n}):this.node().textContent},da.html=function(n){return arguments.length?this.each("function"==typeof n?function(){var t=n.apply(this,arguments);this.innerHTML=null==t?"":t}:null==n?function(){this.innerHTML=""}:function(){this.innerHTML=n}):this.node().innerHTML},da.append=function(n){return n=L(n),this.select(function(){return this.appendChild(n.apply(this,arguments))})},da.insert=function(n,t){return n=L(n),t=M(t),this.select(function(){return this.insertBefore(n.apply(this,arguments),t.apply(this,arguments)||null)})},da.remove=function(){return this.each(function(){var n=this.parentNode;n&&n.removeChild(this)})},da.data=function(n,t){function e(n,e){var r,i,o,a=n.length,f=e.length,h=Math.min(a,f),g=new Array(f),p=new Array(f),v=new Array(a);if(t){var d,m=new u,y=new u,x=[];for(r=-1;++r<a;)d=t.call(i=n[r],i.__data__,r),m.has(d)?v[r]=i:m.set(d,i),x.push(d);for(r=-1;++r<f;)d=t.call(e,o=e[r],r),(i=m.get(d))?(g[r]=i,i.__data__=o):y.has(d)||(p[r]=z(o)),y.set(d,o),m.remove(d);for(r=-1;++r<a;)m.has(x[r])&&(v[r]=n[r])}else{for(r=-1;++r<h;)i=n[r],o=e[r],i?(i.__data__=o,g[r]=i):p[r]=z(o);for(;f>r;++r)p[r]=z(e[r]);for(;a>r;++r)v[r]=n[r]}p.update=g,p.parentNode=g.parentNode=v.parentNode=n.parentNode,c.push(p),s.push(g),l.push(v)}var r,i,o=-1,a=this.length;if(!arguments.length){for(n=new Array(a=(r=this[0]).length);++o<a;)(i=r[o])&&(n[o]=i.__data__);return n}var c=D([]),s=x([]),l=x([]);if("function"==typeof n)for(;++o<a;)e(r=this[o],n.call(r,r.parentNode.__data__,o));else for(;++o<a;)e(r=this[o],n);return s.enter=function(){return c},s.exit=function(){return l},s},da.datum=function(n){return arguments.length?this.property("__data__",n):this.property("__data__")},da.filter=function(n){var t,e,r,u=[];"function"!=typeof n&&(n=q(n));for(var i=0,o=this.length;o>i;i++){u.push(t=[]),t.parentNode=(e=this[i]).parentNode;for(var a=0,c=e.length;c>a;a++)(r=e[a])&&n.call(r,r.__data__,a,i)&&t.push(r)}return x(u)},da.order=function(){for(var n=-1,t=this.length;++n<t;)for(var e,r=this[n],u=r.length-1,i=r[u];--u>=0;)(e=r[u])&&(i&&i!==e.nextSibling&&i.parentNode.insertBefore(e,i),i=e);return this},da.sort=function(n){n=T.apply(this,arguments);for(var t=-1,e=this.length;++t<e;)this[t].sort(n);return this.order()},da.each=function(n){return R(this,function(t,e,r){n.call(t,t.__data__,e,r)})},da.call=function(n){var t=Bo(arguments);return n.apply(t[0]=this,t),this},da.empty=function(){return!this.node()},da.node=function(){for(var n=0,t=this.length;t>n;n++)for(var e=this[n],r=0,u=e.length;u>r;r++){var i=e[r];if(i)return i}return null},da.size=function(){var n=0;return this.each(function(){++n}),n};var ya=[];Xo.selection.enter=D,Xo.selection.enter.prototype=ya,ya.append=da.append,ya.empty=da.empty,ya.node=da.node,ya.call=da.call,ya.size=da.size,ya.select=function(n){for(var t,e,r,u,i,o=[],a=-1,c=this.length;++a<c;){r=(u=this[a]).update,o.push(t=[]),t.parentNode=u.parentNode;for(var s=-1,l=u.length;++s<l;)(i=u[s])?(t.push(r[s]=e=n.call(u.parentNode,i.__data__,s,a)),e.__data__=i.__data__):t.push(null)}return x(o)},ya.insert=function(n,t){return arguments.length<2&&(t=P(this)),da.insert.call(this,n,t)},da.transition=function(){for(var n,t,e=ks||++Ls,r=[],u=Es||{time:Date.now(),ease:yu,delay:0,duration:250},i=-1,o=this.length;++i<o;){r.push(n=[]);for(var a=this[i],c=-1,s=a.length;++c<s;)(t=a[c])&&jo(t,c,e,u),n.push(t)}return Do(r,e)},da.interrupt=function(){return this.each(U)},Xo.select=function(n){var t=["string"==typeof n?ha(n,Wo):n];return t.parentNode=Jo,x([t])},Xo.selectAll=function(n){var t=Bo("string"==typeof n?ga(n,Wo):n);return t.parentNode=Jo,x([t])};var xa=Xo.select(Jo);da.on=function(n,t,e){var r=arguments.length;if(3>r){if("string"!=typeof n){2>r&&(t=!1);for(e in n)this.each(j(e,n[e],t));return this}if(2>r)return(r=this.node()["__on"+n])&&r._;e=!1}return this.each(j(n,t,e))};var Ma=Xo.map({mouseenter:"mouseover",mouseleave:"mouseout"});Ma.forEach(function(n){"on"+n in Wo&&Ma.remove(n)});var _a="onselectstart"in Wo?null:h(Jo.style,"userSelect"),ba=0;Xo.mouse=function(n){return Y(n,m())};var wa=/WebKit/.test(Go.navigator.userAgent)?-1:0;Xo.touches=function(n,t){return arguments.length<2&&(t=m().touches),t?Bo(t).map(function(t){var e=Y(n,t);return e.identifier=t.identifier,e}):[]},Xo.behavior.drag=function(){function n(){this.on("mousedown.drag",o).on("touchstart.drag",a)}function t(){return Xo.event.changedTouches[0].identifier}function e(n,t){return Xo.touches(n).filter(function(n){return n.identifier===t})[0]}function r(n,t,e,r){return function(){function o(){var n=t(l,g),e=n[0]-v[0],r=n[1]-v[1];d|=e|r,v=n,f({type:"drag",x:n[0]+c[0],y:n[1]+c[1],dx:e,dy:r})}function a(){m.on(e+"."+p,null).on(r+"."+p,null),y(d&&Xo.event.target===h),f({type:"dragend"})}var c,s=this,l=s.parentNode,f=u.of(s,arguments),h=Xo.event.target,g=n(),p=null==g?"drag":"drag-"+g,v=t(l,g),d=0,m=Xo.select(Go).on(e+"."+p,o).on(r+"."+p,a),y=O();i?(c=i.apply(s,arguments),c=[c.x-v[0],c.y-v[1]]):c=[0,0],f({type:"dragstart"})}}var u=y(n,"drag","dragstart","dragend"),i=null,o=r(g,Xo.mouse,"mousemove","mouseup"),a=r(t,e,"touchmove","touchend");return n.origin=function(t){return arguments.length?(i=t,n):i},Xo.rebind(n,u,"on")};var Sa=Math.PI,ka=2*Sa,Ea=Sa/2,Aa=1e-6,Ca=Aa*Aa,Na=Sa/180,La=180/Sa,za=Math.SQRT2,qa=2,Ta=4;Xo.interpolateZoom=function(n,t){function e(n){var t=n*y;if(m){var e=B(v),o=i/(qa*h)*(e*W(za*t+v)-$(v));return[r+o*s,u+o*l,i*e/B(za*t+v)]}return[r+n*s,u+n*l,i*Math.exp(za*t)]}var r=n[0],u=n[1],i=n[2],o=t[0],a=t[1],c=t[2],s=o-r,l=a-u,f=s*s+l*l,h=Math.sqrt(f),g=(c*c-i*i+Ta*f)/(2*i*qa*h),p=(c*c-i*i-Ta*f)/(2*c*qa*h),v=Math.log(Math.sqrt(g*g+1)-g),d=Math.log(Math.sqrt(p*p+1)-p),m=d-v,y=(m||Math.log(c/i))/za;return e.duration=1e3*y,e},Xo.behavior.zoom=function(){function n(n){n.on(A,s).on(Pa+".zoom",f).on(C,h).on("dblclick.zoom",g).on(L,l)}function t(n){return[(n[0]-S.x)/S.k,(n[1]-S.y)/S.k]}function e(n){return[n[0]*S.k+S.x,n[1]*S.k+S.y]}function r(n){S.k=Math.max(E[0],Math.min(E[1],n))}function u(n,t){t=e(t),S.x+=n[0]-t[0],S.y+=n[1]-t[1]}function i(){_&&_.domain(M.range().map(function(n){return(n-S.x)/S.k}).map(M.invert)),w&&w.domain(b.range().map(function(n){return(n-S.y)/S.k}).map(b.invert))}function o(n){n({type:"zoomstart"})}function a(n){i(),n({type:"zoom",scale:S.k,translate:[S.x,S.y]})}function c(n){n({type:"zoomend"})}function s(){function n(){l=1,u(Xo.mouse(r),g),a(i)}function e(){f.on(C,Go===r?h:null).on(N,null),p(l&&Xo.event.target===s),c(i)}var r=this,i=z.of(r,arguments),s=Xo.event.target,l=0,f=Xo.select(Go).on(C,n).on(N,e),g=t(Xo.mouse(r)),p=O();U.call(r),o(i)}function l(){function n(){var n=Xo.touches(g);return h=S.k,n.forEach(function(n){n.identifier in v&&(v[n.identifier]=t(n))}),n}function e(){for(var t=Xo.event.changedTouches,e=0,i=t.length;i>e;++e)v[t[e].identifier]=null;var o=n(),c=Date.now();if(1===o.length){if(500>c-x){var s=o[0],l=v[s.identifier];r(2*S.k),u(s,l),d(),a(p)}x=c}else if(o.length>1){var s=o[0],f=o[1],h=s[0]-f[0],g=s[1]-f[1];m=h*h+g*g}}function i(){for(var n,t,e,i,o=Xo.touches(g),c=0,s=o.length;s>c;++c,i=null)if(e=o[c],i=v[e.identifier]){if(t)break;n=e,t=i}if(i){var l=(l=e[0]-n[0])*l+(l=e[1]-n[1])*l,f=m&&Math.sqrt(l/m);n=[(n[0]+e[0])/2,(n[1]+e[1])/2],t=[(t[0]+i[0])/2,(t[1]+i[1])/2],r(f*h)}x=null,u(n,t),a(p)}function f(){if(Xo.event.touches.length){for(var t=Xo.event.changedTouches,e=0,r=t.length;r>e;++e)delete v[t[e].identifier];for(var u in v)return void n()}b.on(M,null).on(_,null),w.on(A,s).on(L,l),k(),c(p)}var h,g=this,p=z.of(g,arguments),v={},m=0,y=Xo.event.changedTouches[0].identifier,M="touchmove.zoom-"+y,_="touchend.zoom-"+y,b=Xo.select(Go).on(M,i).on(_,f),w=Xo.select(g).on(A,null).on(L,e),k=O();U.call(g),e(),o(p)}function f(){var n=z.of(this,arguments);m?clearTimeout(m):(U.call(this),o(n)),m=setTimeout(function(){m=null,c(n)},50),d();var e=v||Xo.mouse(this);p||(p=t(e)),r(Math.pow(2,.002*Ra())*S.k),u(e,p),a(n)}function h(){p=null}function g(){var n=z.of(this,arguments),e=Xo.mouse(this),i=t(e),s=Math.log(S.k)/Math.LN2;o(n),r(Math.pow(2,Xo.event.shiftKey?Math.ceil(s)-1:Math.floor(s)+1)),u(e,i),a(n),c(n)}var p,v,m,x,M,_,b,w,S={x:0,y:0,k:1},k=[960,500],E=Da,A="mousedown.zoom",C="mousemove.zoom",N="mouseup.zoom",L="touchstart.zoom",z=y(n,"zoomstart","zoom","zoomend");return n.event=function(n){n.each(function(){var n=z.of(this,arguments),t=S;ks?Xo.select(this).transition().each("start.zoom",function(){S=this.__chart__||{x:0,y:0,k:1},o(n)}).tween("zoom:zoom",function(){var e=k[0],r=k[1],u=e/2,i=r/2,o=Xo.interpolateZoom([(u-S.x)/S.k,(i-S.y)/S.k,e/S.k],[(u-t.x)/t.k,(i-t.y)/t.k,e/t.k]);return function(t){var r=o(t),c=e/r[2];this.__chart__=S={x:u-r[0]*c,y:i-r[1]*c,k:c},a(n)}}).each("end.zoom",function(){c(n)}):(this.__chart__=S,o(n),a(n),c(n))})},n.translate=function(t){return arguments.length?(S={x:+t[0],y:+t[1],k:S.k},i(),n):[S.x,S.y]},n.scale=function(t){return arguments.length?(S={x:S.x,y:S.y,k:+t},i(),n):S.k},n.scaleExtent=function(t){return arguments.length?(E=null==t?Da:[+t[0],+t[1]],n):E},n.center=function(t){return arguments.length?(v=t&&[+t[0],+t[1]],n):v},n.size=function(t){return arguments.length?(k=t&&[+t[0],+t[1]],n):k},n.x=function(t){return arguments.length?(_=t,M=t.copy(),S={x:0,y:0,k:1},n):_},n.y=function(t){return arguments.length?(w=t,b=t.copy(),S={x:0,y:0,k:1},n):w},Xo.rebind(n,z,"on")};var Ra,Da=[0,1/0],Pa="onwheel"in Wo?(Ra=function(){return-Xo.event.deltaY*(Xo.event.deltaMode?120:1)},"wheel"):"onmousewheel"in Wo?(Ra=function(){return Xo.event.wheelDelta},"mousewheel"):(Ra=function(){return-Xo.event.detail},"MozMousePixelScroll");G.prototype.toString=function(){return this.rgb()+""},Xo.hsl=function(n,t,e){return 1===arguments.length?n instanceof Q?K(n.h,n.s,n.l):dt(""+n,mt,K):K(+n,+t,+e)};var Ua=Q.prototype=new G;Ua.brighter=function(n){return n=Math.pow(.7,arguments.length?n:1),K(this.h,this.s,this.l/n)},Ua.darker=function(n){return n=Math.pow(.7,arguments.length?n:1),K(this.h,this.s,n*this.l)},Ua.rgb=function(){return nt(this.h,this.s,this.l)},Xo.hcl=function(n,t,e){return 1===arguments.length?n instanceof et?tt(n.h,n.c,n.l):n instanceof it?at(n.l,n.a,n.b):at((n=yt((n=Xo.rgb(n)).r,n.g,n.b)).l,n.a,n.b):tt(+n,+t,+e)};var ja=et.prototype=new G;ja.brighter=function(n){return tt(this.h,this.c,Math.min(100,this.l+Ha*(arguments.length?n:1)))},ja.darker=function(n){return tt(this.h,this.c,Math.max(0,this.l-Ha*(arguments.length?n:1)))},ja.rgb=function(){return rt(this.h,this.c,this.l).rgb()},Xo.lab=function(n,t,e){return 1===arguments.length?n instanceof it?ut(n.l,n.a,n.b):n instanceof et?rt(n.l,n.c,n.h):yt((n=Xo.rgb(n)).r,n.g,n.b):ut(+n,+t,+e)};var Ha=18,Fa=.95047,Oa=1,Ya=1.08883,Ia=it.prototype=new G;Ia.brighter=function(n){return ut(Math.min(100,this.l+Ha*(arguments.length?n:1)),this.a,this.b)},Ia.darker=function(n){return ut(Math.max(0,this.l-Ha*(arguments.length?n:1)),this.a,this.b)},Ia.rgb=function(){return ot(this.l,this.a,this.b)},Xo.rgb=function(n,t,e){return 1===arguments.length?n instanceof pt?gt(n.r,n.g,n.b):dt(""+n,gt,nt):gt(~~n,~~t,~~e)};var Za=pt.prototype=new G;Za.brighter=function(n){n=Math.pow(.7,arguments.length?n:1);var t=this.r,e=this.g,r=this.b,u=30;return t||e||r?(t&&u>t&&(t=u),e&&u>e&&(e=u),r&&u>r&&(r=u),gt(Math.min(255,~~(t/n)),Math.min(255,~~(e/n)),Math.min(255,~~(r/n)))):gt(u,u,u)},Za.darker=function(n){return n=Math.pow(.7,arguments.length?n:1),gt(~~(n*this.r),~~(n*this.g),~~(n*this.b))},Za.hsl=function(){return mt(this.r,this.g,this.b)},Za.toString=function(){return"#"+vt(this.r)+vt(this.g)+vt(this.b)};var Va=Xo.map({aliceblue:15792383,antiquewhite:16444375,aqua:65535,aquamarine:8388564,azure:15794175,beige:16119260,bisque:16770244,black:0,blanchedalmond:16772045,blue:255,blueviolet:9055202,brown:10824234,burlywood:14596231,cadetblue:6266528,chartreuse:8388352,chocolate:13789470,coral:16744272,cornflowerblue:6591981,cornsilk:16775388,crimson:14423100,cyan:65535,darkblue:139,darkcyan:35723,darkgoldenrod:12092939,darkgray:11119017,darkgreen:25600,darkgrey:11119017,darkkhaki:12433259,darkmagenta:9109643,darkolivegreen:5597999,darkorange:16747520,darkorchid:10040012,darkred:9109504,darksalmon:15308410,darkseagreen:9419919,darkslateblue:4734347,darkslategray:3100495,darkslategrey:3100495,darkturquoise:52945,darkviolet:9699539,deeppink:16716947,deepskyblue:49151,dimgray:6908265,dimgrey:6908265,dodgerblue:2003199,firebrick:11674146,floralwhite:16775920,forestgreen:2263842,fuchsia:16711935,gainsboro:14474460,ghostwhite:16316671,gold:16766720,goldenrod:14329120,gray:8421504,green:32768,greenyellow:11403055,grey:8421504,honeydew:15794160,hotpink:16738740,indianred:13458524,indigo:4915330,ivory:16777200,khaki:15787660,lavender:15132410,lavenderblush:16773365,lawngreen:8190976,lemonchiffon:16775885,lightblue:11393254,lightcoral:15761536,lightcyan:14745599,lightgoldenrodyellow:16448210,lightgray:13882323,lightgreen:9498256,lightgrey:13882323,lightpink:16758465,lightsalmon:16752762,lightseagreen:2142890,lightskyblue:8900346,lightslategray:7833753,lightslategrey:7833753,lightsteelblue:11584734,lightyellow:16777184,lime:65280,limegreen:3329330,linen:16445670,magenta:16711935,maroon:8388608,mediumaquamarine:6737322,mediumblue:205,mediumorchid:12211667,mediumpurple:9662683,mediumseagreen:3978097,mediumslateblue:8087790,mediumspringgreen:64154,mediumturquoise:4772300,mediumvioletred:13047173,midnightblue:1644912,mintcream:16121850,mistyrose:16770273,moccasin:16770229,navajowhite:16768685,navy:128,oldlace:16643558,olive:8421376,olivedrab:7048739,orange:16753920,orangered:16729344,orchid:14315734,palegoldenrod:15657130,palegreen:10025880,paleturquoise:11529966,palevioletred:14381203,papayawhip:16773077,peachpuff:16767673,peru:13468991,pink:16761035,plum:14524637,powderblue:11591910,purple:8388736,red:16711680,rosybrown:12357519,royalblue:4286945,saddlebrown:9127187,salmon:16416882,sandybrown:16032864,seagreen:3050327,seashell:16774638,sienna:10506797,silver:12632256,skyblue:8900331,slateblue:6970061,slategray:7372944,slategrey:7372944,snow:16775930,springgreen:65407,steelblue:4620980,tan:13808780,teal:32896,thistle:14204888,tomato:16737095,turquoise:4251856,violet:15631086,wheat:16113331,white:16777215,whitesmoke:16119285,yellow:16776960,yellowgreen:10145074});Va.forEach(function(n,t){Va.set(n,ft(t))}),Xo.functor=_t,Xo.xhr=wt(bt),Xo.dsv=function(n,t){function e(n,e,i){arguments.length<3&&(i=e,e=null);var o=St(n,t,null==e?r:u(e),i);return o.row=function(n){return arguments.length?o.response(null==(e=n)?r:u(n)):e},o}function r(n){return e.parse(n.responseText)}function u(n){return function(t){return e.parse(t.responseText,n)}}function i(t){return t.map(o).join(n)}function o(n){return a.test(n)?'"'+n.replace(/\"/g,'""')+'"':n}var a=new RegExp('["'+n+"\n]"),c=n.charCodeAt(0);return e.parse=function(n,t){var r;return e.parseRows(n,function(n,e){if(r)return r(n,e-1);var u=new Function("d","return {"+n.map(function(n,t){return JSON.stringify(n)+": d["+t+"]"}).join(",")+"}");r=t?function(n,e){return t(u(n),e)}:u})},e.parseRows=function(n,t){function e(){if(l>=s)return o;if(u)return u=!1,i;var t=l;if(34===n.charCodeAt(t)){for(var e=t;e++<s;)if(34===n.charCodeAt(e)){if(34!==n.charCodeAt(e+1))break;++e}l=e+2;var r=n.charCodeAt(e+1);return 13===r?(u=!0,10===n.charCodeAt(e+2)&&++l):10===r&&(u=!0),n.substring(t+1,e).replace(/""/g,'"')}for(;s>l;){var r=n.charCodeAt(l++),a=1;if(10===r)u=!0;else if(13===r)u=!0,10===n.charCodeAt(l)&&(++l,++a);else if(r!==c)continue;return n.substring(t,l-a)}return n.substring(t)}for(var r,u,i={},o={},a=[],s=n.length,l=0,f=0;(r=e())!==o;){for(var h=[];r!==i&&r!==o;)h.push(r),r=e();(!t||(h=t(h,f++)))&&a.push(h)}return a},e.format=function(t){if(Array.isArray(t[0]))return e.formatRows(t);var r=new l,u=[];return t.forEach(function(n){for(var t in n)r.has(t)||u.push(r.add(t))}),[u.map(o).join(n)].concat(t.map(function(t){return u.map(function(n){return o(t[n])}).join(n)})).join("\n")},e.formatRows=function(n){return n.map(i).join("\n")},e},Xo.csv=Xo.dsv(",","text/csv"),Xo.tsv=Xo.dsv("	","text/tab-separated-values");var Xa,$a,Ba,Wa,Ja,Ga=Go[h(Go,"requestAnimationFrame")]||function(n){setTimeout(n,17)};Xo.timer=function(n,t,e){var r=arguments.length;2>r&&(t=0),3>r&&(e=Date.now());var u=e+t,i={c:n,t:u,f:!1,n:null};$a?$a.n=i:Xa=i,$a=i,Ba||(Wa=clearTimeout(Wa),Ba=1,Ga(Et))},Xo.timer.flush=function(){At(),Ct()},Xo.round=function(n,t){return t?Math.round(n*(t=Math.pow(10,t)))/t:Math.round(n)};var Ka=["y","z","a","f","p","n","\xb5","m","","k","M","G","T","P","E","Z","Y"].map(Lt);Xo.formatPrefix=function(n,t){var e=0;return n&&(0>n&&(n*=-1),t&&(n=Xo.round(n,Nt(n,t))),e=1+Math.floor(1e-12+Math.log(n)/Math.LN10),e=Math.max(-24,Math.min(24,3*Math.floor((0>=e?e+1:e-1)/3)))),Ka[8+e/3]};var Qa=/(?:([^{])?([<>=^]))?([+\- ])?([$#])?(0)?(\d+)?(,)?(\.-?\d+)?([a-z%])?/i,nc=Xo.map({b:function(n){return n.toString(2)},c:function(n){return String.fromCharCode(n)},o:function(n){return n.toString(8)},x:function(n){return n.toString(16)},X:function(n){return n.toString(16).toUpperCase()},g:function(n,t){return n.toPrecision(t)},e:function(n,t){return n.toExponential(t)},f:function(n,t){return n.toFixed(t)},r:function(n,t){return(n=Xo.round(n,Nt(n,t))).toFixed(Math.max(0,Math.min(20,Nt(n*(1+1e-15),t))))}}),tc=Xo.time={},ec=Date;Tt.prototype={getDate:function(){return this._.getUTCDate()},getDay:function(){return this._.getUTCDay()},getFullYear:function(){return this._.getUTCFullYear()},getHours:function(){return this._.getUTCHours()},getMilliseconds:function(){return this._.getUTCMilliseconds()},getMinutes:function(){return this._.getUTCMinutes()},getMonth:function(){return this._.getUTCMonth()},getSeconds:function(){return this._.getUTCSeconds()},getTime:function(){return this._.getTime()},getTimezoneOffset:function(){return 0},valueOf:function(){return this._.valueOf()},setDate:function(){rc.setUTCDate.apply(this._,arguments)},setDay:function(){rc.setUTCDay.apply(this._,arguments)},setFullYear:function(){rc.setUTCFullYear.apply(this._,arguments)},setHours:function(){rc.setUTCHours.apply(this._,arguments)},setMilliseconds:function(){rc.setUTCMilliseconds.apply(this._,arguments)},setMinutes:function(){rc.setUTCMinutes.apply(this._,arguments)},setMonth:function(){rc.setUTCMonth.apply(this._,arguments)},setSeconds:function(){rc.setUTCSeconds.apply(this._,arguments)},setTime:function(){rc.setTime.apply(this._,arguments)}};var rc=Date.prototype;tc.year=Rt(function(n){return n=tc.day(n),n.setMonth(0,1),n},function(n,t){n.setFullYear(n.getFullYear()+t)},function(n){return n.getFullYear()}),tc.years=tc.year.range,tc.years.utc=tc.year.utc.range,tc.day=Rt(function(n){var t=new ec(2e3,0);return t.setFullYear(n.getFullYear(),n.getMonth(),n.getDate()),t},function(n,t){n.setDate(n.getDate()+t)},function(n){return n.getDate()-1}),tc.days=tc.day.range,tc.days.utc=tc.day.utc.range,tc.dayOfYear=function(n){var t=tc.year(n);return Math.floor((n-t-6e4*(n.getTimezoneOffset()-t.getTimezoneOffset()))/864e5)},["sunday","monday","tuesday","wednesday","thursday","friday","saturday"].forEach(function(n,t){t=7-t;var e=tc[n]=Rt(function(n){return(n=tc.day(n)).setDate(n.getDate()-(n.getDay()+t)%7),n},function(n,t){n.setDate(n.getDate()+7*Math.floor(t))},function(n){var e=tc.year(n).getDay();return Math.floor((tc.dayOfYear(n)+(e+t)%7)/7)-(e!==t)});tc[n+"s"]=e.range,tc[n+"s"].utc=e.utc.range,tc[n+"OfYear"]=function(n){var e=tc.year(n).getDay();return Math.floor((tc.dayOfYear(n)+(e+t)%7)/7)}}),tc.week=tc.sunday,tc.weeks=tc.sunday.range,tc.weeks.utc=tc.sunday.utc.range,tc.weekOfYear=tc.sundayOfYear;var uc={"-":"",_:" ",0:"0"},ic=/^\s*\d+/,oc=/^%/;Xo.locale=function(n){return{numberFormat:zt(n),timeFormat:Pt(n)}};var ac=Xo.locale({decimal:".",thousands:",",grouping:[3],currency:["$",""],dateTime:"%a %b %e %X %Y",date:"%m/%d/%Y",time:"%H:%M:%S",periods:["AM","PM"],days:["Sunday","Monday","Tuesday","Wednesday","Thursday","Friday","Saturday"],shortDays:["Sun","Mon","Tue","Wed","Thu","Fri","Sat"],months:["January","February","March","April","May","June","July","August","September","October","November","December"],shortMonths:["Jan","Feb","Mar","Apr","May","Jun","Jul","Aug","Sep","Oct","Nov","Dec"]});Xo.format=ac.numberFormat,Xo.geo={},re.prototype={s:0,t:0,add:function(n){ue(n,this.t,cc),ue(cc.s,this.s,this),this.s?this.t+=cc.t:this.s=cc.t},reset:function(){this.s=this.t=0},valueOf:function(){return this.s}};var cc=new re;Xo.geo.stream=function(n,t){n&&sc.hasOwnProperty(n.type)?sc[n.type](n,t):ie(n,t)};var sc={Feature:function(n,t){ie(n.geometry,t)},FeatureCollection:function(n,t){for(var e=n.features,r=-1,u=e.length;++r<u;)ie(e[r].geometry,t)}},lc={Sphere:function(n,t){t.sphere()},Point:function(n,t){n=n.coordinates,t.point(n[0],n[1],n[2])},MultiPoint:function(n,t){for(var e=n.coordinates,r=-1,u=e.length;++r<u;)n=e[r],t.point(n[0],n[1],n[2])},LineString:function(n,t){oe(n.coordinates,t,0)},MultiLineString:function(n,t){for(var e=n.coordinates,r=-1,u=e.length;++r<u;)oe(e[r],t,0)},Polygon:function(n,t){ae(n.coordinates,t)},MultiPolygon:function(n,t){for(var e=n.coordinates,r=-1,u=e.length;++r<u;)ae(e[r],t)},GeometryCollection:function(n,t){for(var e=n.geometries,r=-1,u=e.length;++r<u;)ie(e[r],t)}};Xo.geo.area=function(n){return fc=0,Xo.geo.stream(n,gc),fc};var fc,hc=new re,gc={sphere:function(){fc+=4*Sa},point:g,lineStart:g,lineEnd:g,polygonStart:function(){hc.reset(),gc.lineStart=ce},polygonEnd:function(){var n=2*hc;fc+=0>n?4*Sa+n:n,gc.lineStart=gc.lineEnd=gc.point=g}};Xo.geo.bounds=function(){function n(n,t){x.push(M=[l=n,h=n]),f>t&&(f=t),t>g&&(g=t)}function t(t,e){var r=se([t*Na,e*Na]);if(m){var u=fe(m,r),i=[u[1],-u[0],0],o=fe(i,u);pe(o),o=ve(o);var c=t-p,s=c>0?1:-1,v=o[0]*La*s,d=oa(c)>180;if(d^(v>s*p&&s*t>v)){var y=o[1]*La;y>g&&(g=y)}else if(v=(v+360)%360-180,d^(v>s*p&&s*t>v)){var y=-o[1]*La;f>y&&(f=y)}else f>e&&(f=e),e>g&&(g=e);d?p>t?a(l,t)>a(l,h)&&(h=t):a(t,h)>a(l,h)&&(l=t):h>=l?(l>t&&(l=t),t>h&&(h=t)):t>p?a(l,t)>a(l,h)&&(h=t):a(t,h)>a(l,h)&&(l=t)}else n(t,e);m=r,p=t}function e(){_.point=t}function r(){M[0]=l,M[1]=h,_.point=n,m=null}function u(n,e){if(m){var r=n-p;y+=oa(r)>180?r+(r>0?360:-360):r}else v=n,d=e;gc.point(n,e),t(n,e)}function i(){gc.lineStart()}function o(){u(v,d),gc.lineEnd(),oa(y)>Aa&&(l=-(h=180)),M[0]=l,M[1]=h,m=null}function a(n,t){return(t-=n)<0?t+360:t}function c(n,t){return n[0]-t[0]}function s(n,t){return t[0]<=t[1]?t[0]<=n&&n<=t[1]:n<t[0]||t[1]<n}var l,f,h,g,p,v,d,m,y,x,M,_={point:n,lineStart:e,lineEnd:r,polygonStart:function(){_.point=u,_.lineStart=i,_.lineEnd=o,y=0,gc.polygonStart()},polygonEnd:function(){gc.polygonEnd(),_.point=n,_.lineStart=e,_.lineEnd=r,0>hc?(l=-(h=180),f=-(g=90)):y>Aa?g=90:-Aa>y&&(f=-90),M[0]=l,M[1]=h
}};return function(n){g=h=-(l=f=1/0),x=[],Xo.geo.stream(n,_);var t=x.length;if(t){x.sort(c);for(var e,r=1,u=x[0],i=[u];t>r;++r)e=x[r],s(e[0],u)||s(e[1],u)?(a(u[0],e[1])>a(u[0],u[1])&&(u[1]=e[1]),a(e[0],u[1])>a(u[0],u[1])&&(u[0]=e[0])):i.push(u=e);for(var o,e,p=-1/0,t=i.length-1,r=0,u=i[t];t>=r;u=e,++r)e=i[r],(o=a(u[1],e[0]))>p&&(p=o,l=e[0],h=u[1])}return x=M=null,1/0===l||1/0===f?[[0/0,0/0],[0/0,0/0]]:[[l,f],[h,g]]}}(),Xo.geo.centroid=function(n){pc=vc=dc=mc=yc=xc=Mc=_c=bc=wc=Sc=0,Xo.geo.stream(n,kc);var t=bc,e=wc,r=Sc,u=t*t+e*e+r*r;return Ca>u&&(t=xc,e=Mc,r=_c,Aa>vc&&(t=dc,e=mc,r=yc),u=t*t+e*e+r*r,Ca>u)?[0/0,0/0]:[Math.atan2(e,t)*La,X(r/Math.sqrt(u))*La]};var pc,vc,dc,mc,yc,xc,Mc,_c,bc,wc,Sc,kc={sphere:g,point:me,lineStart:xe,lineEnd:Me,polygonStart:function(){kc.lineStart=_e},polygonEnd:function(){kc.lineStart=xe}},Ec=Ee(be,ze,Te,[-Sa,-Sa/2]),Ac=1e9;Xo.geo.clipExtent=function(){var n,t,e,r,u,i,o={stream:function(n){return u&&(u.valid=!1),u=i(n),u.valid=!0,u},extent:function(a){return arguments.length?(i=Pe(n=+a[0][0],t=+a[0][1],e=+a[1][0],r=+a[1][1]),u&&(u.valid=!1,u=null),o):[[n,t],[e,r]]}};return o.extent([[0,0],[960,500]])},(Xo.geo.conicEqualArea=function(){return je(He)}).raw=He,Xo.geo.albers=function(){return Xo.geo.conicEqualArea().rotate([96,0]).center([-.6,38.7]).parallels([29.5,45.5]).scale(1070)},Xo.geo.albersUsa=function(){function n(n){var i=n[0],o=n[1];return t=null,e(i,o),t||(r(i,o),t)||u(i,o),t}var t,e,r,u,i=Xo.geo.albers(),o=Xo.geo.conicEqualArea().rotate([154,0]).center([-2,58.5]).parallels([55,65]),a=Xo.geo.conicEqualArea().rotate([157,0]).center([-3,19.9]).parallels([8,18]),c={point:function(n,e){t=[n,e]}};return n.invert=function(n){var t=i.scale(),e=i.translate(),r=(n[0]-e[0])/t,u=(n[1]-e[1])/t;return(u>=.12&&.234>u&&r>=-.425&&-.214>r?o:u>=.166&&.234>u&&r>=-.214&&-.115>r?a:i).invert(n)},n.stream=function(n){var t=i.stream(n),e=o.stream(n),r=a.stream(n);return{point:function(n,u){t.point(n,u),e.point(n,u),r.point(n,u)},sphere:function(){t.sphere(),e.sphere(),r.sphere()},lineStart:function(){t.lineStart(),e.lineStart(),r.lineStart()},lineEnd:function(){t.lineEnd(),e.lineEnd(),r.lineEnd()},polygonStart:function(){t.polygonStart(),e.polygonStart(),r.polygonStart()},polygonEnd:function(){t.polygonEnd(),e.polygonEnd(),r.polygonEnd()}}},n.precision=function(t){return arguments.length?(i.precision(t),o.precision(t),a.precision(t),n):i.precision()},n.scale=function(t){return arguments.length?(i.scale(t),o.scale(.35*t),a.scale(t),n.translate(i.translate())):i.scale()},n.translate=function(t){if(!arguments.length)return i.translate();var s=i.scale(),l=+t[0],f=+t[1];return e=i.translate(t).clipExtent([[l-.455*s,f-.238*s],[l+.455*s,f+.238*s]]).stream(c).point,r=o.translate([l-.307*s,f+.201*s]).clipExtent([[l-.425*s+Aa,f+.12*s+Aa],[l-.214*s-Aa,f+.234*s-Aa]]).stream(c).point,u=a.translate([l-.205*s,f+.212*s]).clipExtent([[l-.214*s+Aa,f+.166*s+Aa],[l-.115*s-Aa,f+.234*s-Aa]]).stream(c).point,n},n.scale(1070)};var Cc,Nc,Lc,zc,qc,Tc,Rc={point:g,lineStart:g,lineEnd:g,polygonStart:function(){Nc=0,Rc.lineStart=Fe},polygonEnd:function(){Rc.lineStart=Rc.lineEnd=Rc.point=g,Cc+=oa(Nc/2)}},Dc={point:Oe,lineStart:g,lineEnd:g,polygonStart:g,polygonEnd:g},Pc={point:Ze,lineStart:Ve,lineEnd:Xe,polygonStart:function(){Pc.lineStart=$e},polygonEnd:function(){Pc.point=Ze,Pc.lineStart=Ve,Pc.lineEnd=Xe}};Xo.geo.path=function(){function n(n){return n&&("function"==typeof a&&i.pointRadius(+a.apply(this,arguments)),o&&o.valid||(o=u(i)),Xo.geo.stream(n,o)),i.result()}function t(){return o=null,n}var e,r,u,i,o,a=4.5;return n.area=function(n){return Cc=0,Xo.geo.stream(n,u(Rc)),Cc},n.centroid=function(n){return dc=mc=yc=xc=Mc=_c=bc=wc=Sc=0,Xo.geo.stream(n,u(Pc)),Sc?[bc/Sc,wc/Sc]:_c?[xc/_c,Mc/_c]:yc?[dc/yc,mc/yc]:[0/0,0/0]},n.bounds=function(n){return qc=Tc=-(Lc=zc=1/0),Xo.geo.stream(n,u(Dc)),[[Lc,zc],[qc,Tc]]},n.projection=function(n){return arguments.length?(u=(e=n)?n.stream||Je(n):bt,t()):e},n.context=function(n){return arguments.length?(i=null==(r=n)?new Ye:new Be(n),"function"!=typeof a&&i.pointRadius(a),t()):r},n.pointRadius=function(t){return arguments.length?(a="function"==typeof t?t:(i.pointRadius(+t),+t),n):a},n.projection(Xo.geo.albersUsa()).context(null)},Xo.geo.transform=function(n){return{stream:function(t){var e=new Ge(t);for(var r in n)e[r]=n[r];return e}}},Ge.prototype={point:function(n,t){this.stream.point(n,t)},sphere:function(){this.stream.sphere()},lineStart:function(){this.stream.lineStart()},lineEnd:function(){this.stream.lineEnd()},polygonStart:function(){this.stream.polygonStart()},polygonEnd:function(){this.stream.polygonEnd()}},Xo.geo.projection=Qe,Xo.geo.projectionMutator=nr,(Xo.geo.equirectangular=function(){return Qe(er)}).raw=er.invert=er,Xo.geo.rotation=function(n){function t(t){return t=n(t[0]*Na,t[1]*Na),t[0]*=La,t[1]*=La,t}return n=ur(n[0]%360*Na,n[1]*Na,n.length>2?n[2]*Na:0),t.invert=function(t){return t=n.invert(t[0]*Na,t[1]*Na),t[0]*=La,t[1]*=La,t},t},rr.invert=er,Xo.geo.circle=function(){function n(){var n="function"==typeof r?r.apply(this,arguments):r,t=ur(-n[0]*Na,-n[1]*Na,0).invert,u=[];return e(null,null,1,{point:function(n,e){u.push(n=t(n,e)),n[0]*=La,n[1]*=La}}),{type:"Polygon",coordinates:[u]}}var t,e,r=[0,0],u=6;return n.origin=function(t){return arguments.length?(r=t,n):r},n.angle=function(r){return arguments.length?(e=cr((t=+r)*Na,u*Na),n):t},n.precision=function(r){return arguments.length?(e=cr(t*Na,(u=+r)*Na),n):u},n.angle(90)},Xo.geo.distance=function(n,t){var e,r=(t[0]-n[0])*Na,u=n[1]*Na,i=t[1]*Na,o=Math.sin(r),a=Math.cos(r),c=Math.sin(u),s=Math.cos(u),l=Math.sin(i),f=Math.cos(i);return Math.atan2(Math.sqrt((e=f*o)*e+(e=s*l-c*f*a)*e),c*l+s*f*a)},Xo.geo.graticule=function(){function n(){return{type:"MultiLineString",coordinates:t()}}function t(){return Xo.range(Math.ceil(i/d)*d,u,d).map(h).concat(Xo.range(Math.ceil(s/m)*m,c,m).map(g)).concat(Xo.range(Math.ceil(r/p)*p,e,p).filter(function(n){return oa(n%d)>Aa}).map(l)).concat(Xo.range(Math.ceil(a/v)*v,o,v).filter(function(n){return oa(n%m)>Aa}).map(f))}var e,r,u,i,o,a,c,s,l,f,h,g,p=10,v=p,d=90,m=360,y=2.5;return n.lines=function(){return t().map(function(n){return{type:"LineString",coordinates:n}})},n.outline=function(){return{type:"Polygon",coordinates:[h(i).concat(g(c).slice(1),h(u).reverse().slice(1),g(s).reverse().slice(1))]}},n.extent=function(t){return arguments.length?n.majorExtent(t).minorExtent(t):n.minorExtent()},n.majorExtent=function(t){return arguments.length?(i=+t[0][0],u=+t[1][0],s=+t[0][1],c=+t[1][1],i>u&&(t=i,i=u,u=t),s>c&&(t=s,s=c,c=t),n.precision(y)):[[i,s],[u,c]]},n.minorExtent=function(t){return arguments.length?(r=+t[0][0],e=+t[1][0],a=+t[0][1],o=+t[1][1],r>e&&(t=r,r=e,e=t),a>o&&(t=a,a=o,o=t),n.precision(y)):[[r,a],[e,o]]},n.step=function(t){return arguments.length?n.majorStep(t).minorStep(t):n.minorStep()},n.majorStep=function(t){return arguments.length?(d=+t[0],m=+t[1],n):[d,m]},n.minorStep=function(t){return arguments.length?(p=+t[0],v=+t[1],n):[p,v]},n.precision=function(t){return arguments.length?(y=+t,l=lr(a,o,90),f=fr(r,e,y),h=lr(s,c,90),g=fr(i,u,y),n):y},n.majorExtent([[-180,-90+Aa],[180,90-Aa]]).minorExtent([[-180,-80-Aa],[180,80+Aa]])},Xo.geo.greatArc=function(){function n(){return{type:"LineString",coordinates:[t||r.apply(this,arguments),e||u.apply(this,arguments)]}}var t,e,r=hr,u=gr;return n.distance=function(){return Xo.geo.distance(t||r.apply(this,arguments),e||u.apply(this,arguments))},n.source=function(e){return arguments.length?(r=e,t="function"==typeof e?null:e,n):r},n.target=function(t){return arguments.length?(u=t,e="function"==typeof t?null:t,n):u},n.precision=function(){return arguments.length?n:0},n},Xo.geo.interpolate=function(n,t){return pr(n[0]*Na,n[1]*Na,t[0]*Na,t[1]*Na)},Xo.geo.length=function(n){return Uc=0,Xo.geo.stream(n,jc),Uc};var Uc,jc={sphere:g,point:g,lineStart:vr,lineEnd:g,polygonStart:g,polygonEnd:g},Hc=dr(function(n){return Math.sqrt(2/(1+n))},function(n){return 2*Math.asin(n/2)});(Xo.geo.azimuthalEqualArea=function(){return Qe(Hc)}).raw=Hc;var Fc=dr(function(n){var t=Math.acos(n);return t&&t/Math.sin(t)},bt);(Xo.geo.azimuthalEquidistant=function(){return Qe(Fc)}).raw=Fc,(Xo.geo.conicConformal=function(){return je(mr)}).raw=mr,(Xo.geo.conicEquidistant=function(){return je(yr)}).raw=yr;var Oc=dr(function(n){return 1/n},Math.atan);(Xo.geo.gnomonic=function(){return Qe(Oc)}).raw=Oc,xr.invert=function(n,t){return[n,2*Math.atan(Math.exp(t))-Ea]},(Xo.geo.mercator=function(){return Mr(xr)}).raw=xr;var Yc=dr(function(){return 1},Math.asin);(Xo.geo.orthographic=function(){return Qe(Yc)}).raw=Yc;var Ic=dr(function(n){return 1/(1+n)},function(n){return 2*Math.atan(n)});(Xo.geo.stereographic=function(){return Qe(Ic)}).raw=Ic,_r.invert=function(n,t){return[-t,2*Math.atan(Math.exp(n))-Ea]},(Xo.geo.transverseMercator=function(){var n=Mr(_r),t=n.center,e=n.rotate;return n.center=function(n){return n?t([-n[1],n[0]]):(n=t(),[-n[1],n[0]])},n.rotate=function(n){return n?e([n[0],n[1],n.length>2?n[2]+90:90]):(n=e(),[n[0],n[1],n[2]-90])},n.rotate([0,0])}).raw=_r,Xo.geom={},Xo.geom.hull=function(n){function t(n){if(n.length<3)return[];var t,u=_t(e),i=_t(r),o=n.length,a=[],c=[];for(t=0;o>t;t++)a.push([+u.call(this,n[t],t),+i.call(this,n[t],t),t]);for(a.sort(kr),t=0;o>t;t++)c.push([a[t][0],-a[t][1]]);var s=Sr(a),l=Sr(c),f=l[0]===s[0],h=l[l.length-1]===s[s.length-1],g=[];for(t=s.length-1;t>=0;--t)g.push(n[a[s[t]][2]]);for(t=+f;t<l.length-h;++t)g.push(n[a[l[t]][2]]);return g}var e=br,r=wr;return arguments.length?t(n):(t.x=function(n){return arguments.length?(e=n,t):e},t.y=function(n){return arguments.length?(r=n,t):r},t)},Xo.geom.polygon=function(n){return fa(n,Zc),n};var Zc=Xo.geom.polygon.prototype=[];Zc.area=function(){for(var n,t=-1,e=this.length,r=this[e-1],u=0;++t<e;)n=r,r=this[t],u+=n[1]*r[0]-n[0]*r[1];return.5*u},Zc.centroid=function(n){var t,e,r=-1,u=this.length,i=0,o=0,a=this[u-1];for(arguments.length||(n=-1/(6*this.area()));++r<u;)t=a,a=this[r],e=t[0]*a[1]-a[0]*t[1],i+=(t[0]+a[0])*e,o+=(t[1]+a[1])*e;return[i*n,o*n]},Zc.clip=function(n){for(var t,e,r,u,i,o,a=Cr(n),c=-1,s=this.length-Cr(this),l=this[s-1];++c<s;){for(t=n.slice(),n.length=0,u=this[c],i=t[(r=t.length-a)-1],e=-1;++e<r;)o=t[e],Er(o,l,u)?(Er(i,l,u)||n.push(Ar(i,o,l,u)),n.push(o)):Er(i,l,u)&&n.push(Ar(i,o,l,u)),i=o;a&&n.push(n[0]),l=u}return n};var Vc,Xc,$c,Bc,Wc,Jc=[],Gc=[];Pr.prototype.prepare=function(){for(var n,t=this.edges,e=t.length;e--;)n=t[e].edge,n.b&&n.a||t.splice(e,1);return t.sort(jr),t.length},Br.prototype={start:function(){return this.edge.l===this.site?this.edge.a:this.edge.b},end:function(){return this.edge.l===this.site?this.edge.b:this.edge.a}},Wr.prototype={insert:function(n,t){var e,r,u;if(n){if(t.P=n,t.N=n.N,n.N&&(n.N.P=t),n.N=t,n.R){for(n=n.R;n.L;)n=n.L;n.L=t}else n.R=t;e=n}else this._?(n=Qr(this._),t.P=null,t.N=n,n.P=n.L=t,e=n):(t.P=t.N=null,this._=t,e=null);for(t.L=t.R=null,t.U=e,t.C=!0,n=t;e&&e.C;)r=e.U,e===r.L?(u=r.R,u&&u.C?(e.C=u.C=!1,r.C=!0,n=r):(n===e.R&&(Gr(this,e),n=e,e=n.U),e.C=!1,r.C=!0,Kr(this,r))):(u=r.L,u&&u.C?(e.C=u.C=!1,r.C=!0,n=r):(n===e.L&&(Kr(this,e),n=e,e=n.U),e.C=!1,r.C=!0,Gr(this,r))),e=n.U;this._.C=!1},remove:function(n){n.N&&(n.N.P=n.P),n.P&&(n.P.N=n.N),n.N=n.P=null;var t,e,r,u=n.U,i=n.L,o=n.R;if(e=i?o?Qr(o):i:o,u?u.L===n?u.L=e:u.R=e:this._=e,i&&o?(r=e.C,e.C=n.C,e.L=i,i.U=e,e!==o?(u=e.U,e.U=n.U,n=e.R,u.L=n,e.R=o,o.U=e):(e.U=u,u=e,n=e.R)):(r=n.C,n=e),n&&(n.U=u),!r){if(n&&n.C)return n.C=!1,void 0;do{if(n===this._)break;if(n===u.L){if(t=u.R,t.C&&(t.C=!1,u.C=!0,Gr(this,u),t=u.R),t.L&&t.L.C||t.R&&t.R.C){t.R&&t.R.C||(t.L.C=!1,t.C=!0,Kr(this,t),t=u.R),t.C=u.C,u.C=t.R.C=!1,Gr(this,u),n=this._;break}}else if(t=u.L,t.C&&(t.C=!1,u.C=!0,Kr(this,u),t=u.L),t.L&&t.L.C||t.R&&t.R.C){t.L&&t.L.C||(t.R.C=!1,t.C=!0,Gr(this,t),t=u.L),t.C=u.C,u.C=t.L.C=!1,Kr(this,u),n=this._;break}t.C=!0,n=u,u=u.U}while(!n.C);n&&(n.C=!1)}}},Xo.geom.voronoi=function(n){function t(n){var t=new Array(n.length),r=a[0][0],u=a[0][1],i=a[1][0],o=a[1][1];return nu(e(n),a).cells.forEach(function(e,a){var c=e.edges,s=e.site,l=t[a]=c.length?c.map(function(n){var t=n.start();return[t.x,t.y]}):s.x>=r&&s.x<=i&&s.y>=u&&s.y<=o?[[r,o],[i,o],[i,u],[r,u]]:[];l.point=n[a]}),t}function e(n){return n.map(function(n,t){return{x:Math.round(i(n,t)/Aa)*Aa,y:Math.round(o(n,t)/Aa)*Aa,i:t}})}var r=br,u=wr,i=r,o=u,a=Kc;return n?t(n):(t.links=function(n){return nu(e(n)).edges.filter(function(n){return n.l&&n.r}).map(function(t){return{source:n[t.l.i],target:n[t.r.i]}})},t.triangles=function(n){var t=[];return nu(e(n)).cells.forEach(function(e,r){for(var u,i,o=e.site,a=e.edges.sort(jr),c=-1,s=a.length,l=a[s-1].edge,f=l.l===o?l.r:l.l;++c<s;)u=l,i=f,l=a[c].edge,f=l.l===o?l.r:l.l,r<i.i&&r<f.i&&eu(o,i,f)<0&&t.push([n[r],n[i.i],n[f.i]])}),t},t.x=function(n){return arguments.length?(i=_t(r=n),t):r},t.y=function(n){return arguments.length?(o=_t(u=n),t):u},t.clipExtent=function(n){return arguments.length?(a=null==n?Kc:n,t):a===Kc?null:a},t.size=function(n){return arguments.length?t.clipExtent(n&&[[0,0],n]):a===Kc?null:a&&a[1]},t)};var Kc=[[-1e6,-1e6],[1e6,1e6]];Xo.geom.delaunay=function(n){return Xo.geom.voronoi().triangles(n)},Xo.geom.quadtree=function(n,t,e,r,u){function i(n){function i(n,t,e,r,u,i,o,a){if(!isNaN(e)&&!isNaN(r))if(n.leaf){var c=n.x,l=n.y;if(null!=c)if(oa(c-e)+oa(l-r)<.01)s(n,t,e,r,u,i,o,a);else{var f=n.point;n.x=n.y=n.point=null,s(n,f,c,l,u,i,o,a),s(n,t,e,r,u,i,o,a)}else n.x=e,n.y=r,n.point=t}else s(n,t,e,r,u,i,o,a)}function s(n,t,e,r,u,o,a,c){var s=.5*(u+a),l=.5*(o+c),f=e>=s,h=r>=l,g=(h<<1)+f;n.leaf=!1,n=n.nodes[g]||(n.nodes[g]=iu()),f?u=s:a=s,h?o=l:c=l,i(n,t,e,r,u,o,a,c)}var l,f,h,g,p,v,d,m,y,x=_t(a),M=_t(c);if(null!=t)v=t,d=e,m=r,y=u;else if(m=y=-(v=d=1/0),f=[],h=[],p=n.length,o)for(g=0;p>g;++g)l=n[g],l.x<v&&(v=l.x),l.y<d&&(d=l.y),l.x>m&&(m=l.x),l.y>y&&(y=l.y),f.push(l.x),h.push(l.y);else for(g=0;p>g;++g){var _=+x(l=n[g],g),b=+M(l,g);v>_&&(v=_),d>b&&(d=b),_>m&&(m=_),b>y&&(y=b),f.push(_),h.push(b)}var w=m-v,S=y-d;w>S?y=d+w:m=v+S;var k=iu();if(k.add=function(n){i(k,n,+x(n,++g),+M(n,g),v,d,m,y)},k.visit=function(n){ou(n,k,v,d,m,y)},g=-1,null==t){for(;++g<p;)i(k,n[g],f[g],h[g],v,d,m,y);--g}else n.forEach(k.add);return f=h=n=l=null,k}var o,a=br,c=wr;return(o=arguments.length)?(a=ru,c=uu,3===o&&(u=e,r=t,e=t=0),i(n)):(i.x=function(n){return arguments.length?(a=n,i):a},i.y=function(n){return arguments.length?(c=n,i):c},i.extent=function(n){return arguments.length?(null==n?t=e=r=u=null:(t=+n[0][0],e=+n[0][1],r=+n[1][0],u=+n[1][1]),i):null==t?null:[[t,e],[r,u]]},i.size=function(n){return arguments.length?(null==n?t=e=r=u=null:(t=e=0,r=+n[0],u=+n[1]),i):null==t?null:[r-t,u-e]},i)},Xo.interpolateRgb=au,Xo.interpolateObject=cu,Xo.interpolateNumber=su,Xo.interpolateString=lu;var Qc=/[-+]?(?:\d+\.?\d*|\.?\d+)(?:[eE][-+]?\d+)?/g;Xo.interpolate=fu,Xo.interpolators=[function(n,t){var e=typeof t;return("string"===e?Va.has(t)||/^(#|rgb\(|hsl\()/.test(t)?au:lu:t instanceof G?au:"object"===e?Array.isArray(t)?hu:cu:su)(n,t)}],Xo.interpolateArray=hu;var ns=function(){return bt},ts=Xo.map({linear:ns,poly:xu,quad:function(){return du},cubic:function(){return mu},sin:function(){return Mu},exp:function(){return _u},circle:function(){return bu},elastic:wu,back:Su,bounce:function(){return ku}}),es=Xo.map({"in":bt,out:pu,"in-out":vu,"out-in":function(n){return vu(pu(n))}});Xo.ease=function(n){var t=n.indexOf("-"),e=t>=0?n.substring(0,t):n,r=t>=0?n.substring(t+1):"in";return e=ts.get(e)||ns,r=es.get(r)||bt,gu(r(e.apply(null,$o.call(arguments,1))))},Xo.interpolateHcl=Eu,Xo.interpolateHsl=Au,Xo.interpolateLab=Cu,Xo.interpolateRound=Nu,Xo.transform=function(n){var t=Wo.createElementNS(Xo.ns.prefix.svg,"g");return(Xo.transform=function(n){if(null!=n){t.setAttribute("transform",n);var e=t.transform.baseVal.consolidate()}return new Lu(e?e.matrix:rs)})(n)},Lu.prototype.toString=function(){return"translate("+this.translate+")rotate("+this.rotate+")skewX("+this.skew+")scale("+this.scale+")"};var rs={a:1,b:0,c:0,d:1,e:0,f:0};Xo.interpolateTransform=Ru,Xo.layout={},Xo.layout.bundle=function(){return function(n){for(var t=[],e=-1,r=n.length;++e<r;)t.push(Uu(n[e]));return t}},Xo.layout.chord=function(){function n(){var n,s,f,h,g,p={},v=[],d=Xo.range(i),m=[];for(e=[],r=[],n=0,h=-1;++h<i;){for(s=0,g=-1;++g<i;)s+=u[h][g];v.push(s),m.push(Xo.range(i)),n+=s}for(o&&d.sort(function(n,t){return o(v[n],v[t])}),a&&m.forEach(function(n,t){n.sort(function(n,e){return a(u[t][n],u[t][e])})}),n=(ka-l*i)/n,s=0,h=-1;++h<i;){for(f=s,g=-1;++g<i;){var y=d[h],x=m[y][g],M=u[y][x],_=s,b=s+=M*n;p[y+"-"+x]={index:y,subindex:x,startAngle:_,endAngle:b,value:M}}r[y]={index:y,startAngle:f,endAngle:s,value:(s-f)/n},s+=l}for(h=-1;++h<i;)for(g=h-1;++g<i;){var w=p[h+"-"+g],S=p[g+"-"+h];(w.value||S.value)&&e.push(w.value<S.value?{source:S,target:w}:{source:w,target:S})}c&&t()}function t(){e.sort(function(n,t){return c((n.source.value+n.target.value)/2,(t.source.value+t.target.value)/2)})}var e,r,u,i,o,a,c,s={},l=0;return s.matrix=function(n){return arguments.length?(i=(u=n)&&u.length,e=r=null,s):u},s.padding=function(n){return arguments.length?(l=n,e=r=null,s):l},s.sortGroups=function(n){return arguments.length?(o=n,e=r=null,s):o},s.sortSubgroups=function(n){return arguments.length?(a=n,e=null,s):a},s.sortChords=function(n){return arguments.length?(c=n,e&&t(),s):c},s.chords=function(){return e||n(),e},s.groups=function(){return r||n(),r},s},Xo.layout.force=function(){function n(n){return function(t,e,r,u){if(t.point!==n){var i=t.cx-n.x,o=t.cy-n.y,a=u-e,c=i*i+o*o;if(c>a*a/d){if(p>c){var s=t.charge/c;n.px-=i*s,n.py-=o*s}return!0}if(t.point&&c&&p>c){var s=t.pointCharge/c;n.px-=i*s,n.py-=o*s}}return!t.charge}}function t(n){n.px=Xo.event.x,n.py=Xo.event.y,a.resume()}var e,r,u,i,o,a={},c=Xo.dispatch("start","tick","end"),s=[1,1],l=.9,f=us,h=is,g=-30,p=os,v=.1,d=.64,m=[],y=[];return a.tick=function(){if((r*=.99)<.005)return c.end({type:"end",alpha:r=0}),!0;var t,e,a,f,h,p,d,x,M,_=m.length,b=y.length;for(e=0;b>e;++e)a=y[e],f=a.source,h=a.target,x=h.x-f.x,M=h.y-f.y,(p=x*x+M*M)&&(p=r*i[e]*((p=Math.sqrt(p))-u[e])/p,x*=p,M*=p,h.x-=x*(d=f.weight/(h.weight+f.weight)),h.y-=M*d,f.x+=x*(d=1-d),f.y+=M*d);if((d=r*v)&&(x=s[0]/2,M=s[1]/2,e=-1,d))for(;++e<_;)a=m[e],a.x+=(x-a.x)*d,a.y+=(M-a.y)*d;if(g)for(Zu(t=Xo.geom.quadtree(m),r,o),e=-1;++e<_;)(a=m[e]).fixed||t.visit(n(a));for(e=-1;++e<_;)a=m[e],a.fixed?(a.x=a.px,a.y=a.py):(a.x-=(a.px-(a.px=a.x))*l,a.y-=(a.py-(a.py=a.y))*l);c.tick({type:"tick",alpha:r})},a.nodes=function(n){return arguments.length?(m=n,a):m},a.links=function(n){return arguments.length?(y=n,a):y},a.size=function(n){return arguments.length?(s=n,a):s},a.linkDistance=function(n){return arguments.length?(f="function"==typeof n?n:+n,a):f},a.distance=a.linkDistance,a.linkStrength=function(n){return arguments.length?(h="function"==typeof n?n:+n,a):h},a.friction=function(n){return arguments.length?(l=+n,a):l},a.charge=function(n){return arguments.length?(g="function"==typeof n?n:+n,a):g},a.chargeDistance=function(n){return arguments.length?(p=n*n,a):Math.sqrt(p)},a.gravity=function(n){return arguments.length?(v=+n,a):v},a.theta=function(n){return arguments.length?(d=n*n,a):Math.sqrt(d)},a.alpha=function(n){return arguments.length?(n=+n,r?r=n>0?n:0:n>0&&(c.start({type:"start",alpha:r=n}),Xo.timer(a.tick)),a):r},a.start=function(){function n(n,r){if(!e){for(e=new Array(c),a=0;c>a;++a)e[a]=[];for(a=0;s>a;++a){var u=y[a];e[u.source.index].push(u.target),e[u.target.index].push(u.source)}}for(var i,o=e[t],a=-1,s=o.length;++a<s;)if(!isNaN(i=o[a][n]))return i;return Math.random()*r}var t,e,r,c=m.length,l=y.length,p=s[0],v=s[1];for(t=0;c>t;++t)(r=m[t]).index=t,r.weight=0;for(t=0;l>t;++t)r=y[t],"number"==typeof r.source&&(r.source=m[r.source]),"number"==typeof r.target&&(r.target=m[r.target]),++r.source.weight,++r.target.weight;for(t=0;c>t;++t)r=m[t],isNaN(r.x)&&(r.x=n("x",p)),isNaN(r.y)&&(r.y=n("y",v)),isNaN(r.px)&&(r.px=r.x),isNaN(r.py)&&(r.py=r.y);if(u=[],"function"==typeof f)for(t=0;l>t;++t)u[t]=+f.call(this,y[t],t);else for(t=0;l>t;++t)u[t]=f;if(i=[],"function"==typeof h)for(t=0;l>t;++t)i[t]=+h.call(this,y[t],t);else for(t=0;l>t;++t)i[t]=h;if(o=[],"function"==typeof g)for(t=0;c>t;++t)o[t]=+g.call(this,m[t],t);else for(t=0;c>t;++t)o[t]=g;return a.resume()},a.resume=function(){return a.alpha(.1)},a.stop=function(){return a.alpha(0)},a.drag=function(){return e||(e=Xo.behavior.drag().origin(bt).on("dragstart.force",Fu).on("drag.force",t).on("dragend.force",Ou)),arguments.length?(this.on("mouseover.force",Yu).on("mouseout.force",Iu).call(e),void 0):e},Xo.rebind(a,c,"on")};var us=20,is=1,os=1/0;Xo.layout.hierarchy=function(){function n(t,o,a){var c=u.call(e,t,o);if(t.depth=o,a.push(t),c&&(s=c.length)){for(var s,l,f=-1,h=t.children=new Array(s),g=0,p=o+1;++f<s;)l=h[f]=n(c[f],p,a),l.parent=t,g+=l.value;r&&h.sort(r),i&&(t.value=g)}else delete t.children,i&&(t.value=+i.call(e,t,o)||0);return t}function t(n,r){var u=n.children,o=0;if(u&&(a=u.length))for(var a,c=-1,s=r+1;++c<a;)o+=t(u[c],s);else i&&(o=+i.call(e,n,r)||0);return i&&(n.value=o),o}function e(t){var e=[];return n(t,0,e),e}var r=Bu,u=Xu,i=$u;return e.sort=function(n){return arguments.length?(r=n,e):r},e.children=function(n){return arguments.length?(u=n,e):u},e.value=function(n){return arguments.length?(i=n,e):i},e.revalue=function(n){return t(n,0),n},e},Xo.layout.partition=function(){function n(t,e,r,u){var i=t.children;if(t.x=e,t.y=t.depth*u,t.dx=r,t.dy=u,i&&(o=i.length)){var o,a,c,s=-1;for(r=t.value?r/t.value:0;++s<o;)n(a=i[s],e,c=a.value*r,u),e+=c}}function t(n){var e=n.children,r=0;if(e&&(u=e.length))for(var u,i=-1;++i<u;)r=Math.max(r,t(e[i]));return 1+r}function e(e,i){var o=r.call(this,e,i);return n(o[0],0,u[0],u[1]/t(o[0])),o}var r=Xo.layout.hierarchy(),u=[1,1];return e.size=function(n){return arguments.length?(u=n,e):u},Vu(e,r)},Xo.layout.pie=function(){function n(i){var o=i.map(function(e,r){return+t.call(n,e,r)}),a=+("function"==typeof r?r.apply(this,arguments):r),c=(("function"==typeof u?u.apply(this,arguments):u)-a)/Xo.sum(o),s=Xo.range(i.length);null!=e&&s.sort(e===as?function(n,t){return o[t]-o[n]}:function(n,t){return e(i[n],i[t])});var l=[];return s.forEach(function(n){var t;l[n]={data:i[n],value:t=o[n],startAngle:a,endAngle:a+=t*c}}),l}var t=Number,e=as,r=0,u=ka;return n.value=function(e){return arguments.length?(t=e,n):t},n.sort=function(t){return arguments.length?(e=t,n):e},n.startAngle=function(t){return arguments.length?(r=t,n):r},n.endAngle=function(t){return arguments.length?(u=t,n):u},n};var as={};Xo.layout.stack=function(){function n(a,c){var s=a.map(function(e,r){return t.call(n,e,r)}),l=s.map(function(t){return t.map(function(t,e){return[i.call(n,t,e),o.call(n,t,e)]})}),f=e.call(n,l,c);s=Xo.permute(s,f),l=Xo.permute(l,f);var h,g,p,v=r.call(n,l,c),d=s.length,m=s[0].length;for(g=0;m>g;++g)for(u.call(n,s[0][g],p=v[g],l[0][g][1]),h=1;d>h;++h)u.call(n,s[h][g],p+=l[h-1][g][1],l[h][g][1]);return a}var t=bt,e=Qu,r=ni,u=Ku,i=Ju,o=Gu;return n.values=function(e){return arguments.length?(t=e,n):t},n.order=function(t){return arguments.length?(e="function"==typeof t?t:cs.get(t)||Qu,n):e},n.offset=function(t){return arguments.length?(r="function"==typeof t?t:ss.get(t)||ni,n):r},n.x=function(t){return arguments.length?(i=t,n):i},n.y=function(t){return arguments.length?(o=t,n):o},n.out=function(t){return arguments.length?(u=t,n):u},n};var cs=Xo.map({"inside-out":function(n){var t,e,r=n.length,u=n.map(ti),i=n.map(ei),o=Xo.range(r).sort(function(n,t){return u[n]-u[t]}),a=0,c=0,s=[],l=[];for(t=0;r>t;++t)e=o[t],c>a?(a+=i[e],s.push(e)):(c+=i[e],l.push(e));return l.reverse().concat(s)},reverse:function(n){return Xo.range(n.length).reverse()},"default":Qu}),ss=Xo.map({silhouette:function(n){var t,e,r,u=n.length,i=n[0].length,o=[],a=0,c=[];for(e=0;i>e;++e){for(t=0,r=0;u>t;t++)r+=n[t][e][1];r>a&&(a=r),o.push(r)}for(e=0;i>e;++e)c[e]=(a-o[e])/2;return c},wiggle:function(n){var t,e,r,u,i,o,a,c,s,l=n.length,f=n[0],h=f.length,g=[];for(g[0]=c=s=0,e=1;h>e;++e){for(t=0,u=0;l>t;++t)u+=n[t][e][1];for(t=0,i=0,a=f[e][0]-f[e-1][0];l>t;++t){for(r=0,o=(n[t][e][1]-n[t][e-1][1])/(2*a);t>r;++r)o+=(n[r][e][1]-n[r][e-1][1])/a;i+=o*n[t][e][1]}g[e]=c-=u?i/u*a:0,s>c&&(s=c)}for(e=0;h>e;++e)g[e]-=s;return g},expand:function(n){var t,e,r,u=n.length,i=n[0].length,o=1/u,a=[];for(e=0;i>e;++e){for(t=0,r=0;u>t;t++)r+=n[t][e][1];if(r)for(t=0;u>t;t++)n[t][e][1]/=r;else for(t=0;u>t;t++)n[t][e][1]=o}for(e=0;i>e;++e)a[e]=0;return a},zero:ni});Xo.layout.histogram=function(){function n(n,i){for(var o,a,c=[],s=n.map(e,this),l=r.call(this,s,i),f=u.call(this,l,s,i),i=-1,h=s.length,g=f.length-1,p=t?1:1/h;++i<g;)o=c[i]=[],o.dx=f[i+1]-(o.x=f[i]),o.y=0;if(g>0)for(i=-1;++i<h;)a=s[i],a>=l[0]&&a<=l[1]&&(o=c[Xo.bisect(f,a,1,g)-1],o.y+=p,o.push(n[i]));return c}var t=!0,e=Number,r=oi,u=ui;return n.value=function(t){return arguments.length?(e=t,n):e},n.range=function(t){return arguments.length?(r=_t(t),n):r},n.bins=function(t){return arguments.length?(u="number"==typeof t?function(n){return ii(n,t)}:_t(t),n):u},n.frequency=function(e){return arguments.length?(t=!!e,n):t},n},Xo.layout.tree=function(){function n(n,i){function o(n,t){var r=n.children,u=n._tree;if(r&&(i=r.length)){for(var i,a,s,l=r[0],f=l,h=-1;++h<i;)s=r[h],o(s,a),f=c(s,a,f),a=s;vi(n);var g=.5*(l._tree.prelim+s._tree.prelim);t?(u.prelim=t._tree.prelim+e(n,t),u.mod=u.prelim-g):u.prelim=g}else t&&(u.prelim=t._tree.prelim+e(n,t))}function a(n,t){n.x=n._tree.prelim+t;var e=n.children;if(e&&(r=e.length)){var r,u=-1;for(t+=n._tree.mod;++u<r;)a(e[u],t)}}function c(n,t,r){if(t){for(var u,i=n,o=n,a=t,c=n.parent.children[0],s=i._tree.mod,l=o._tree.mod,f=a._tree.mod,h=c._tree.mod;a=si(a),i=ci(i),a&&i;)c=ci(c),o=si(o),o._tree.ancestor=n,u=a._tree.prelim+f-i._tree.prelim-s+e(a,i),u>0&&(di(mi(a,n,r),n,u),s+=u,l+=u),f+=a._tree.mod,s+=i._tree.mod,h+=c._tree.mod,l+=o._tree.mod;a&&!si(o)&&(o._tree.thread=a,o._tree.mod+=f-l),i&&!ci(c)&&(c._tree.thread=i,c._tree.mod+=s-h,r=n)}return r}var s=t.call(this,n,i),l=s[0];pi(l,function(n,t){n._tree={ancestor:n,prelim:0,mod:0,change:0,shift:0,number:t?t._tree.number+1:0}}),o(l),a(l,-l._tree.prelim);var f=li(l,hi),h=li(l,fi),g=li(l,gi),p=f.x-e(f,h)/2,v=h.x+e(h,f)/2,d=g.depth||1;return pi(l,u?function(n){n.x*=r[0],n.y=n.depth*r[1],delete n._tree}:function(n){n.x=(n.x-p)/(v-p)*r[0],n.y=n.depth/d*r[1],delete n._tree}),s}var t=Xo.layout.hierarchy().sort(null).value(null),e=ai,r=[1,1],u=!1;return n.separation=function(t){return arguments.length?(e=t,n):e},n.size=function(t){return arguments.length?(u=null==(r=t),n):u?null:r},n.nodeSize=function(t){return arguments.length?(u=null!=(r=t),n):u?r:null},Vu(n,t)},Xo.layout.pack=function(){function n(n,i){var o=e.call(this,n,i),a=o[0],c=u[0],s=u[1],l=null==t?Math.sqrt:"function"==typeof t?t:function(){return t};if(a.x=a.y=0,pi(a,function(n){n.r=+l(n.value)}),pi(a,bi),r){var f=r*(t?1:Math.max(2*a.r/c,2*a.r/s))/2;pi(a,function(n){n.r+=f}),pi(a,bi),pi(a,function(n){n.r-=f})}return ki(a,c/2,s/2,t?1:1/Math.max(2*a.r/c,2*a.r/s)),o}var t,e=Xo.layout.hierarchy().sort(yi),r=0,u=[1,1];return n.size=function(t){return arguments.length?(u=t,n):u},n.radius=function(e){return arguments.length?(t=null==e||"function"==typeof e?e:+e,n):t},n.padding=function(t){return arguments.length?(r=+t,n):r},Vu(n,e)},Xo.layout.cluster=function(){function n(n,i){var o,a=t.call(this,n,i),c=a[0],s=0;pi(c,function(n){var t=n.children;t&&t.length?(n.x=Ci(t),n.y=Ai(t)):(n.x=o?s+=e(n,o):0,n.y=0,o=n)});var l=Ni(c),f=Li(c),h=l.x-e(l,f)/2,g=f.x+e(f,l)/2;return pi(c,u?function(n){n.x=(n.x-c.x)*r[0],n.y=(c.y-n.y)*r[1]}:function(n){n.x=(n.x-h)/(g-h)*r[0],n.y=(1-(c.y?n.y/c.y:1))*r[1]}),a}var t=Xo.layout.hierarchy().sort(null).value(null),e=ai,r=[1,1],u=!1;return n.separation=function(t){return arguments.length?(e=t,n):e},n.size=function(t){return arguments.length?(u=null==(r=t),n):u?null:r},n.nodeSize=function(t){return arguments.length?(u=null!=(r=t),n):u?r:null},Vu(n,t)},Xo.layout.treemap=function(){function n(n,t){for(var e,r,u=-1,i=n.length;++u<i;)r=(e=n[u]).value*(0>t?0:t),e.area=isNaN(r)||0>=r?0:r}function t(e){var i=e.children;if(i&&i.length){var o,a,c,s=f(e),l=[],h=i.slice(),p=1/0,v="slice"===g?s.dx:"dice"===g?s.dy:"slice-dice"===g?1&e.depth?s.dy:s.dx:Math.min(s.dx,s.dy);for(n(h,s.dx*s.dy/e.value),l.area=0;(c=h.length)>0;)l.push(o=h[c-1]),l.area+=o.area,"squarify"!==g||(a=r(l,v))<=p?(h.pop(),p=a):(l.area-=l.pop().area,u(l,v,s,!1),v=Math.min(s.dx,s.dy),l.length=l.area=0,p=1/0);l.length&&(u(l,v,s,!0),l.length=l.area=0),i.forEach(t)}}function e(t){var r=t.children;if(r&&r.length){var i,o=f(t),a=r.slice(),c=[];for(n(a,o.dx*o.dy/t.value),c.area=0;i=a.pop();)c.push(i),c.area+=i.area,null!=i.z&&(u(c,i.z?o.dx:o.dy,o,!a.length),c.length=c.area=0);r.forEach(e)}}function r(n,t){for(var e,r=n.area,u=0,i=1/0,o=-1,a=n.length;++o<a;)(e=n[o].area)&&(i>e&&(i=e),e>u&&(u=e));return r*=r,t*=t,r?Math.max(t*u*p/r,r/(t*i*p)):1/0}function u(n,t,e,r){var u,i=-1,o=n.length,a=e.x,s=e.y,l=t?c(n.area/t):0;if(t==e.dx){for((r||l>e.dy)&&(l=e.dy);++i<o;)u=n[i],u.x=a,u.y=s,u.dy=l,a+=u.dx=Math.min(e.x+e.dx-a,l?c(u.area/l):0);u.z=!0,u.dx+=e.x+e.dx-a,e.y+=l,e.dy-=l}else{for((r||l>e.dx)&&(l=e.dx);++i<o;)u=n[i],u.x=a,u.y=s,u.dx=l,s+=u.dy=Math.min(e.y+e.dy-s,l?c(u.area/l):0);u.z=!1,u.dy+=e.y+e.dy-s,e.x+=l,e.dx-=l}}function i(r){var u=o||a(r),i=u[0];return i.x=0,i.y=0,i.dx=s[0],i.dy=s[1],o&&a.revalue(i),n([i],i.dx*i.dy/i.value),(o?e:t)(i),h&&(o=u),u}var o,a=Xo.layout.hierarchy(),c=Math.round,s=[1,1],l=null,f=zi,h=!1,g="squarify",p=.5*(1+Math.sqrt(5));return i.size=function(n){return arguments.length?(s=n,i):s},i.padding=function(n){function t(t){var e=n.call(i,t,t.depth);return null==e?zi(t):qi(t,"number"==typeof e?[e,e,e,e]:e)}function e(t){return qi(t,n)}if(!arguments.length)return l;var r;return f=null==(l=n)?zi:"function"==(r=typeof n)?t:"number"===r?(n=[n,n,n,n],e):e,i},i.round=function(n){return arguments.length?(c=n?Math.round:Number,i):c!=Number},i.sticky=function(n){return arguments.length?(h=n,o=null,i):h},i.ratio=function(n){return arguments.length?(p=n,i):p},i.mode=function(n){return arguments.length?(g=n+"",i):g},Vu(i,a)},Xo.random={normal:function(n,t){var e=arguments.length;return 2>e&&(t=1),1>e&&(n=0),function(){var e,r,u;do e=2*Math.random()-1,r=2*Math.random()-1,u=e*e+r*r;while(!u||u>1);return n+t*e*Math.sqrt(-2*Math.log(u)/u)}},logNormal:function(){var n=Xo.random.normal.apply(Xo,arguments);return function(){return Math.exp(n())}},bates:function(n){var t=Xo.random.irwinHall(n);return function(){return t()/n}},irwinHall:function(n){return function(){for(var t=0,e=0;n>e;e++)t+=Math.random();return t}}},Xo.scale={};var ls={floor:bt,ceil:bt};Xo.scale.linear=function(){return Hi([0,1],[0,1],fu,!1)};var fs={s:1,g:1,p:1,r:1,e:1};Xo.scale.log=function(){return $i(Xo.scale.linear().domain([0,1]),10,!0,[1,10])};var hs=Xo.format(".0e"),gs={floor:function(n){return-Math.ceil(-n)},ceil:function(n){return-Math.floor(-n)}};Xo.scale.pow=function(){return Bi(Xo.scale.linear(),1,[0,1])},Xo.scale.sqrt=function(){return Xo.scale.pow().exponent(.5)},Xo.scale.ordinal=function(){return Ji([],{t:"range",a:[[]]})},Xo.scale.category10=function(){return Xo.scale.ordinal().range(ps)},Xo.scale.category20=function(){return Xo.scale.ordinal().range(vs)},Xo.scale.category20b=function(){return Xo.scale.ordinal().range(ds)},Xo.scale.category20c=function(){return Xo.scale.ordinal().range(ms)};var ps=[2062260,16744206,2924588,14034728,9725885,9197131,14907330,8355711,12369186,1556175].map(ht),vs=[2062260,11454440,16744206,16759672,2924588,10018698,14034728,16750742,9725885,12955861,9197131,12885140,14907330,16234194,8355711,13092807,12369186,14408589,1556175,10410725].map(ht),ds=[3750777,5395619,7040719,10264286,6519097,9216594,11915115,13556636,9202993,12426809,15186514,15190932,8666169,11356490,14049643,15177372,8077683,10834324,13528509,14589654].map(ht),ms=[3244733,7057110,10406625,13032431,15095053,16616764,16625259,16634018,3253076,7652470,10607003,13101504,7695281,10394312,12369372,14342891,6513507,9868950,12434877,14277081].map(ht);Xo.scale.quantile=function(){return Gi([],[])
},Xo.scale.quantize=function(){return Ki(0,1,[0,1])},Xo.scale.threshold=function(){return Qi([.5],[0,1])},Xo.scale.identity=function(){return no([0,1])},Xo.svg={},Xo.svg.arc=function(){function n(){var n=t.apply(this,arguments),i=e.apply(this,arguments),o=r.apply(this,arguments)+ys,a=u.apply(this,arguments)+ys,c=(o>a&&(c=o,o=a,a=c),a-o),s=Sa>c?"0":"1",l=Math.cos(o),f=Math.sin(o),h=Math.cos(a),g=Math.sin(a);return c>=xs?n?"M0,"+i+"A"+i+","+i+" 0 1,1 0,"+-i+"A"+i+","+i+" 0 1,1 0,"+i+"M0,"+n+"A"+n+","+n+" 0 1,0 0,"+-n+"A"+n+","+n+" 0 1,0 0,"+n+"Z":"M0,"+i+"A"+i+","+i+" 0 1,1 0,"+-i+"A"+i+","+i+" 0 1,1 0,"+i+"Z":n?"M"+i*l+","+i*f+"A"+i+","+i+" 0 "+s+",1 "+i*h+","+i*g+"L"+n*h+","+n*g+"A"+n+","+n+" 0 "+s+",0 "+n*l+","+n*f+"Z":"M"+i*l+","+i*f+"A"+i+","+i+" 0 "+s+",1 "+i*h+","+i*g+"L0,0"+"Z"}var t=to,e=eo,r=ro,u=uo;return n.innerRadius=function(e){return arguments.length?(t=_t(e),n):t},n.outerRadius=function(t){return arguments.length?(e=_t(t),n):e},n.startAngle=function(t){return arguments.length?(r=_t(t),n):r},n.endAngle=function(t){return arguments.length?(u=_t(t),n):u},n.centroid=function(){var n=(t.apply(this,arguments)+e.apply(this,arguments))/2,i=(r.apply(this,arguments)+u.apply(this,arguments))/2+ys;return[Math.cos(i)*n,Math.sin(i)*n]},n};var ys=-Ea,xs=ka-Aa;Xo.svg.line=function(){return io(bt)};var Ms=Xo.map({linear:oo,"linear-closed":ao,step:co,"step-before":so,"step-after":lo,basis:mo,"basis-open":yo,"basis-closed":xo,bundle:Mo,cardinal:go,"cardinal-open":fo,"cardinal-closed":ho,monotone:Eo});Ms.forEach(function(n,t){t.key=n,t.closed=/-closed$/.test(n)});var _s=[0,2/3,1/3,0],bs=[0,1/3,2/3,0],ws=[0,1/6,2/3,1/6];Xo.svg.line.radial=function(){var n=io(Ao);return n.radius=n.x,delete n.x,n.angle=n.y,delete n.y,n},so.reverse=lo,lo.reverse=so,Xo.svg.area=function(){return Co(bt)},Xo.svg.area.radial=function(){var n=Co(Ao);return n.radius=n.x,delete n.x,n.innerRadius=n.x0,delete n.x0,n.outerRadius=n.x1,delete n.x1,n.angle=n.y,delete n.y,n.startAngle=n.y0,delete n.y0,n.endAngle=n.y1,delete n.y1,n},Xo.svg.chord=function(){function n(n,a){var c=t(this,i,n,a),s=t(this,o,n,a);return"M"+c.p0+r(c.r,c.p1,c.a1-c.a0)+(e(c,s)?u(c.r,c.p1,c.r,c.p0):u(c.r,c.p1,s.r,s.p0)+r(s.r,s.p1,s.a1-s.a0)+u(s.r,s.p1,c.r,c.p0))+"Z"}function t(n,t,e,r){var u=t.call(n,e,r),i=a.call(n,u,r),o=c.call(n,u,r)+ys,l=s.call(n,u,r)+ys;return{r:i,a0:o,a1:l,p0:[i*Math.cos(o),i*Math.sin(o)],p1:[i*Math.cos(l),i*Math.sin(l)]}}function e(n,t){return n.a0==t.a0&&n.a1==t.a1}function r(n,t,e){return"A"+n+","+n+" 0 "+ +(e>Sa)+",1 "+t}function u(n,t,e,r){return"Q 0,0 "+r}var i=hr,o=gr,a=No,c=ro,s=uo;return n.radius=function(t){return arguments.length?(a=_t(t),n):a},n.source=function(t){return arguments.length?(i=_t(t),n):i},n.target=function(t){return arguments.length?(o=_t(t),n):o},n.startAngle=function(t){return arguments.length?(c=_t(t),n):c},n.endAngle=function(t){return arguments.length?(s=_t(t),n):s},n},Xo.svg.diagonal=function(){function n(n,u){var i=t.call(this,n,u),o=e.call(this,n,u),a=(i.y+o.y)/2,c=[i,{x:i.x,y:a},{x:o.x,y:a},o];return c=c.map(r),"M"+c[0]+"C"+c[1]+" "+c[2]+" "+c[3]}var t=hr,e=gr,r=Lo;return n.source=function(e){return arguments.length?(t=_t(e),n):t},n.target=function(t){return arguments.length?(e=_t(t),n):e},n.projection=function(t){return arguments.length?(r=t,n):r},n},Xo.svg.diagonal.radial=function(){var n=Xo.svg.diagonal(),t=Lo,e=n.projection;return n.projection=function(n){return arguments.length?e(zo(t=n)):t},n},Xo.svg.symbol=function(){function n(n,r){return(Ss.get(t.call(this,n,r))||Ro)(e.call(this,n,r))}var t=To,e=qo;return n.type=function(e){return arguments.length?(t=_t(e),n):t},n.size=function(t){return arguments.length?(e=_t(t),n):e},n};var Ss=Xo.map({circle:Ro,cross:function(n){var t=Math.sqrt(n/5)/2;return"M"+-3*t+","+-t+"H"+-t+"V"+-3*t+"H"+t+"V"+-t+"H"+3*t+"V"+t+"H"+t+"V"+3*t+"H"+-t+"V"+t+"H"+-3*t+"Z"},diamond:function(n){var t=Math.sqrt(n/(2*Cs)),e=t*Cs;return"M0,"+-t+"L"+e+",0"+" 0,"+t+" "+-e+",0"+"Z"},square:function(n){var t=Math.sqrt(n)/2;return"M"+-t+","+-t+"L"+t+","+-t+" "+t+","+t+" "+-t+","+t+"Z"},"triangle-down":function(n){var t=Math.sqrt(n/As),e=t*As/2;return"M0,"+e+"L"+t+","+-e+" "+-t+","+-e+"Z"},"triangle-up":function(n){var t=Math.sqrt(n/As),e=t*As/2;return"M0,"+-e+"L"+t+","+e+" "+-t+","+e+"Z"}});Xo.svg.symbolTypes=Ss.keys();var ks,Es,As=Math.sqrt(3),Cs=Math.tan(30*Na),Ns=[],Ls=0;Ns.call=da.call,Ns.empty=da.empty,Ns.node=da.node,Ns.size=da.size,Xo.transition=function(n){return arguments.length?ks?n.transition():n:xa.transition()},Xo.transition.prototype=Ns,Ns.select=function(n){var t,e,r,u=this.id,i=[];n=M(n);for(var o=-1,a=this.length;++o<a;){i.push(t=[]);for(var c=this[o],s=-1,l=c.length;++s<l;)(r=c[s])&&(e=n.call(r,r.__data__,s,o))?("__data__"in r&&(e.__data__=r.__data__),jo(e,s,u,r.__transition__[u]),t.push(e)):t.push(null)}return Do(i,u)},Ns.selectAll=function(n){var t,e,r,u,i,o=this.id,a=[];n=_(n);for(var c=-1,s=this.length;++c<s;)for(var l=this[c],f=-1,h=l.length;++f<h;)if(r=l[f]){i=r.__transition__[o],e=n.call(r,r.__data__,f,c),a.push(t=[]);for(var g=-1,p=e.length;++g<p;)(u=e[g])&&jo(u,g,o,i),t.push(u)}return Do(a,o)},Ns.filter=function(n){var t,e,r,u=[];"function"!=typeof n&&(n=q(n));for(var i=0,o=this.length;o>i;i++){u.push(t=[]);for(var e=this[i],a=0,c=e.length;c>a;a++)(r=e[a])&&n.call(r,r.__data__,a,i)&&t.push(r)}return Do(u,this.id)},Ns.tween=function(n,t){var e=this.id;return arguments.length<2?this.node().__transition__[e].tween.get(n):R(this,null==t?function(t){t.__transition__[e].tween.remove(n)}:function(r){r.__transition__[e].tween.set(n,t)})},Ns.attr=function(n,t){function e(){this.removeAttribute(a)}function r(){this.removeAttributeNS(a.space,a.local)}function u(n){return null==n?e:(n+="",function(){var t,e=this.getAttribute(a);return e!==n&&(t=o(e,n),function(n){this.setAttribute(a,t(n))})})}function i(n){return null==n?r:(n+="",function(){var t,e=this.getAttributeNS(a.space,a.local);return e!==n&&(t=o(e,n),function(n){this.setAttributeNS(a.space,a.local,t(n))})})}if(arguments.length<2){for(t in n)this.attr(t,n[t]);return this}var o="transform"==n?Ru:fu,a=Xo.ns.qualify(n);return Po(this,"attr."+n,t,a.local?i:u)},Ns.attrTween=function(n,t){function e(n,e){var r=t.call(this,n,e,this.getAttribute(u));return r&&function(n){this.setAttribute(u,r(n))}}function r(n,e){var r=t.call(this,n,e,this.getAttributeNS(u.space,u.local));return r&&function(n){this.setAttributeNS(u.space,u.local,r(n))}}var u=Xo.ns.qualify(n);return this.tween("attr."+n,u.local?r:e)},Ns.style=function(n,t,e){function r(){this.style.removeProperty(n)}function u(t){return null==t?r:(t+="",function(){var r,u=Go.getComputedStyle(this,null).getPropertyValue(n);return u!==t&&(r=fu(u,t),function(t){this.style.setProperty(n,r(t),e)})})}var i=arguments.length;if(3>i){if("string"!=typeof n){2>i&&(t="");for(e in n)this.style(e,n[e],t);return this}e=""}return Po(this,"style."+n,t,u)},Ns.styleTween=function(n,t,e){function r(r,u){var i=t.call(this,r,u,Go.getComputedStyle(this,null).getPropertyValue(n));return i&&function(t){this.style.setProperty(n,i(t),e)}}return arguments.length<3&&(e=""),this.tween("style."+n,r)},Ns.text=function(n){return Po(this,"text",n,Uo)},Ns.remove=function(){return this.each("end.transition",function(){var n;this.__transition__.count<2&&(n=this.parentNode)&&n.removeChild(this)})},Ns.ease=function(n){var t=this.id;return arguments.length<1?this.node().__transition__[t].ease:("function"!=typeof n&&(n=Xo.ease.apply(Xo,arguments)),R(this,function(e){e.__transition__[t].ease=n}))},Ns.delay=function(n){var t=this.id;return R(this,"function"==typeof n?function(e,r,u){e.__transition__[t].delay=+n.call(e,e.__data__,r,u)}:(n=+n,function(e){e.__transition__[t].delay=n}))},Ns.duration=function(n){var t=this.id;return R(this,"function"==typeof n?function(e,r,u){e.__transition__[t].duration=Math.max(1,n.call(e,e.__data__,r,u))}:(n=Math.max(1,n),function(e){e.__transition__[t].duration=n}))},Ns.each=function(n,t){var e=this.id;if(arguments.length<2){var r=Es,u=ks;ks=e,R(this,function(t,r,u){Es=t.__transition__[e],n.call(t,t.__data__,r,u)}),Es=r,ks=u}else R(this,function(r){var u=r.__transition__[e];(u.event||(u.event=Xo.dispatch("start","end"))).on(n,t)});return this},Ns.transition=function(){for(var n,t,e,r,u=this.id,i=++Ls,o=[],a=0,c=this.length;c>a;a++){o.push(n=[]);for(var t=this[a],s=0,l=t.length;l>s;s++)(e=t[s])&&(r=Object.create(e.__transition__[u]),r.delay+=r.duration,jo(e,s,i,r)),n.push(e)}return Do(o,i)},Xo.svg.axis=function(){function n(n){n.each(function(){var n,s=Xo.select(this),l=this.__chart__||e,f=this.__chart__=e.copy(),h=null==c?f.ticks?f.ticks.apply(f,a):f.domain():c,g=null==t?f.tickFormat?f.tickFormat.apply(f,a):bt:t,p=s.selectAll(".tick").data(h,f),v=p.enter().insert("g",".domain").attr("class","tick").style("opacity",Aa),d=Xo.transition(p.exit()).style("opacity",Aa).remove(),m=Xo.transition(p).style("opacity",1),y=Ri(f),x=s.selectAll(".domain").data([0]),M=(x.enter().append("path").attr("class","domain"),Xo.transition(x));v.append("line"),v.append("text");var _=v.select("line"),b=m.select("line"),w=p.select("text").text(g),S=v.select("text"),k=m.select("text");switch(r){case"bottom":n=Ho,_.attr("y2",u),S.attr("y",Math.max(u,0)+o),b.attr("x2",0).attr("y2",u),k.attr("x",0).attr("y",Math.max(u,0)+o),w.attr("dy",".71em").style("text-anchor","middle"),M.attr("d","M"+y[0]+","+i+"V0H"+y[1]+"V"+i);break;case"top":n=Ho,_.attr("y2",-u),S.attr("y",-(Math.max(u,0)+o)),b.attr("x2",0).attr("y2",-u),k.attr("x",0).attr("y",-(Math.max(u,0)+o)),w.attr("dy","0em").style("text-anchor","middle"),M.attr("d","M"+y[0]+","+-i+"V0H"+y[1]+"V"+-i);break;case"left":n=Fo,_.attr("x2",-u),S.attr("x",-(Math.max(u,0)+o)),b.attr("x2",-u).attr("y2",0),k.attr("x",-(Math.max(u,0)+o)).attr("y",0),w.attr("dy",".32em").style("text-anchor","end"),M.attr("d","M"+-i+","+y[0]+"H0V"+y[1]+"H"+-i);break;case"right":n=Fo,_.attr("x2",u),S.attr("x",Math.max(u,0)+o),b.attr("x2",u).attr("y2",0),k.attr("x",Math.max(u,0)+o).attr("y",0),w.attr("dy",".32em").style("text-anchor","start"),M.attr("d","M"+i+","+y[0]+"H0V"+y[1]+"H"+i)}if(f.rangeBand){var E=f,A=E.rangeBand()/2;l=f=function(n){return E(n)+A}}else l.rangeBand?l=f:d.call(n,f);v.call(n,l),m.call(n,f)})}var t,e=Xo.scale.linear(),r=zs,u=6,i=6,o=3,a=[10],c=null;return n.scale=function(t){return arguments.length?(e=t,n):e},n.orient=function(t){return arguments.length?(r=t in qs?t+"":zs,n):r},n.ticks=function(){return arguments.length?(a=arguments,n):a},n.tickValues=function(t){return arguments.length?(c=t,n):c},n.tickFormat=function(e){return arguments.length?(t=e,n):t},n.tickSize=function(t){var e=arguments.length;return e?(u=+t,i=+arguments[e-1],n):u},n.innerTickSize=function(t){return arguments.length?(u=+t,n):u},n.outerTickSize=function(t){return arguments.length?(i=+t,n):i},n.tickPadding=function(t){return arguments.length?(o=+t,n):o},n.tickSubdivide=function(){return arguments.length&&n},n};var zs="bottom",qs={top:1,right:1,bottom:1,left:1};Xo.svg.brush=function(){function n(i){i.each(function(){var i=Xo.select(this).style("pointer-events","all").style("-webkit-tap-highlight-color","rgba(0,0,0,0)").on("mousedown.brush",u).on("touchstart.brush",u),o=i.selectAll(".background").data([0]);o.enter().append("rect").attr("class","background").style("visibility","hidden").style("cursor","crosshair"),i.selectAll(".extent").data([0]).enter().append("rect").attr("class","extent").style("cursor","move");var a=i.selectAll(".resize").data(p,bt);a.exit().remove(),a.enter().append("g").attr("class",function(n){return"resize "+n}).style("cursor",function(n){return Ts[n]}).append("rect").attr("x",function(n){return/[ew]$/.test(n)?-3:null}).attr("y",function(n){return/^[ns]/.test(n)?-3:null}).attr("width",6).attr("height",6).style("visibility","hidden"),a.style("display",n.empty()?"none":null);var l,f=Xo.transition(i),h=Xo.transition(o);c&&(l=Ri(c),h.attr("x",l[0]).attr("width",l[1]-l[0]),e(f)),s&&(l=Ri(s),h.attr("y",l[0]).attr("height",l[1]-l[0]),r(f)),t(f)})}function t(n){n.selectAll(".resize").attr("transform",function(n){return"translate("+l[+/e$/.test(n)]+","+f[+/^s/.test(n)]+")"})}function e(n){n.select(".extent").attr("x",l[0]),n.selectAll(".extent,.n>rect,.s>rect").attr("width",l[1]-l[0])}function r(n){n.select(".extent").attr("y",f[0]),n.selectAll(".extent,.e>rect,.w>rect").attr("height",f[1]-f[0])}function u(){function u(){32==Xo.event.keyCode&&(C||(x=null,L[0]-=l[1],L[1]-=f[1],C=2),d())}function p(){32==Xo.event.keyCode&&2==C&&(L[0]+=l[1],L[1]+=f[1],C=0,d())}function v(){var n=Xo.mouse(_),u=!1;M&&(n[0]+=M[0],n[1]+=M[1]),C||(Xo.event.altKey?(x||(x=[(l[0]+l[1])/2,(f[0]+f[1])/2]),L[0]=l[+(n[0]<x[0])],L[1]=f[+(n[1]<x[1])]):x=null),E&&m(n,c,0)&&(e(S),u=!0),A&&m(n,s,1)&&(r(S),u=!0),u&&(t(S),w({type:"brush",mode:C?"move":"resize"}))}function m(n,t,e){var r,u,a=Ri(t),c=a[0],s=a[1],p=L[e],v=e?f:l,d=v[1]-v[0];return C&&(c-=p,s-=d+p),r=(e?g:h)?Math.max(c,Math.min(s,n[e])):n[e],C?u=(r+=p)+d:(x&&(p=Math.max(c,Math.min(s,2*x[e]-r))),r>p?(u=r,r=p):u=p),v[0]!=r||v[1]!=u?(e?o=null:i=null,v[0]=r,v[1]=u,!0):void 0}function y(){v(),S.style("pointer-events","all").selectAll(".resize").style("display",n.empty()?"none":null),Xo.select("body").style("cursor",null),z.on("mousemove.brush",null).on("mouseup.brush",null).on("touchmove.brush",null).on("touchend.brush",null).on("keydown.brush",null).on("keyup.brush",null),N(),w({type:"brushend"})}var x,M,_=this,b=Xo.select(Xo.event.target),w=a.of(_,arguments),S=Xo.select(_),k=b.datum(),E=!/^(n|s)$/.test(k)&&c,A=!/^(e|w)$/.test(k)&&s,C=b.classed("extent"),N=O(),L=Xo.mouse(_),z=Xo.select(Go).on("keydown.brush",u).on("keyup.brush",p);if(Xo.event.changedTouches?z.on("touchmove.brush",v).on("touchend.brush",y):z.on("mousemove.brush",v).on("mouseup.brush",y),S.interrupt().selectAll("*").interrupt(),C)L[0]=l[0]-L[0],L[1]=f[0]-L[1];else if(k){var q=+/w$/.test(k),T=+/^n/.test(k);M=[l[1-q]-L[0],f[1-T]-L[1]],L[0]=l[q],L[1]=f[T]}else Xo.event.altKey&&(x=L.slice());S.style("pointer-events","none").selectAll(".resize").style("display",null),Xo.select("body").style("cursor",b.style("cursor")),w({type:"brushstart"}),v()}var i,o,a=y(n,"brushstart","brush","brushend"),c=null,s=null,l=[0,0],f=[0,0],h=!0,g=!0,p=Rs[0];return n.event=function(n){n.each(function(){var n=a.of(this,arguments),t={x:l,y:f,i:i,j:o},e=this.__chart__||t;this.__chart__=t,ks?Xo.select(this).transition().each("start.brush",function(){i=e.i,o=e.j,l=e.x,f=e.y,n({type:"brushstart"})}).tween("brush:brush",function(){var e=hu(l,t.x),r=hu(f,t.y);return i=o=null,function(u){l=t.x=e(u),f=t.y=r(u),n({type:"brush",mode:"resize"})}}).each("end.brush",function(){i=t.i,o=t.j,n({type:"brush",mode:"resize"}),n({type:"brushend"})}):(n({type:"brushstart"}),n({type:"brush",mode:"resize"}),n({type:"brushend"}))})},n.x=function(t){return arguments.length?(c=t,p=Rs[!c<<1|!s],n):c},n.y=function(t){return arguments.length?(s=t,p=Rs[!c<<1|!s],n):s},n.clamp=function(t){return arguments.length?(c&&s?(h=!!t[0],g=!!t[1]):c?h=!!t:s&&(g=!!t),n):c&&s?[h,g]:c?h:s?g:null},n.extent=function(t){var e,r,u,a,h;return arguments.length?(c&&(e=t[0],r=t[1],s&&(e=e[0],r=r[0]),i=[e,r],c.invert&&(e=c(e),r=c(r)),e>r&&(h=e,e=r,r=h),(e!=l[0]||r!=l[1])&&(l=[e,r])),s&&(u=t[0],a=t[1],c&&(u=u[1],a=a[1]),o=[u,a],s.invert&&(u=s(u),a=s(a)),u>a&&(h=u,u=a,a=h),(u!=f[0]||a!=f[1])&&(f=[u,a])),n):(c&&(i?(e=i[0],r=i[1]):(e=l[0],r=l[1],c.invert&&(e=c.invert(e),r=c.invert(r)),e>r&&(h=e,e=r,r=h))),s&&(o?(u=o[0],a=o[1]):(u=f[0],a=f[1],s.invert&&(u=s.invert(u),a=s.invert(a)),u>a&&(h=u,u=a,a=h))),c&&s?[[e,u],[r,a]]:c?[e,r]:s&&[u,a])},n.clear=function(){return n.empty()||(l=[0,0],f=[0,0],i=o=null),n},n.empty=function(){return!!c&&l[0]==l[1]||!!s&&f[0]==f[1]},Xo.rebind(n,a,"on")};var Ts={n:"ns-resize",e:"ew-resize",s:"ns-resize",w:"ew-resize",nw:"nwse-resize",ne:"nesw-resize",se:"nwse-resize",sw:"nesw-resize"},Rs=[["n","e","s","w","nw","ne","se","sw"],["e","w"],["n","s"],[]],Ds=tc.format=ac.timeFormat,Ps=Ds.utc,Us=Ps("%Y-%m-%dT%H:%M:%S.%LZ");Ds.iso=Date.prototype.toISOString&&+new Date("2000-01-01T00:00:00.000Z")?Oo:Us,Oo.parse=function(n){var t=new Date(n);return isNaN(t)?null:t},Oo.toString=Us.toString,tc.second=Rt(function(n){return new ec(1e3*Math.floor(n/1e3))},function(n,t){n.setTime(n.getTime()+1e3*Math.floor(t))},function(n){return n.getSeconds()}),tc.seconds=tc.second.range,tc.seconds.utc=tc.second.utc.range,tc.minute=Rt(function(n){return new ec(6e4*Math.floor(n/6e4))},function(n,t){n.setTime(n.getTime()+6e4*Math.floor(t))},function(n){return n.getMinutes()}),tc.minutes=tc.minute.range,tc.minutes.utc=tc.minute.utc.range,tc.hour=Rt(function(n){var t=n.getTimezoneOffset()/60;return new ec(36e5*(Math.floor(n/36e5-t)+t))},function(n,t){n.setTime(n.getTime()+36e5*Math.floor(t))},function(n){return n.getHours()}),tc.hours=tc.hour.range,tc.hours.utc=tc.hour.utc.range,tc.month=Rt(function(n){return n=tc.day(n),n.setDate(1),n},function(n,t){n.setMonth(n.getMonth()+t)},function(n){return n.getMonth()}),tc.months=tc.month.range,tc.months.utc=tc.month.utc.range;var js=[1e3,5e3,15e3,3e4,6e4,3e5,9e5,18e5,36e5,108e5,216e5,432e5,864e5,1728e5,6048e5,2592e6,7776e6,31536e6],Hs=[[tc.second,1],[tc.second,5],[tc.second,15],[tc.second,30],[tc.minute,1],[tc.minute,5],[tc.minute,15],[tc.minute,30],[tc.hour,1],[tc.hour,3],[tc.hour,6],[tc.hour,12],[tc.day,1],[tc.day,2],[tc.week,1],[tc.month,1],[tc.month,3],[tc.year,1]],Fs=Ds.multi([[".%L",function(n){return n.getMilliseconds()}],[":%S",function(n){return n.getSeconds()}],["%I:%M",function(n){return n.getMinutes()}],["%I %p",function(n){return n.getHours()}],["%a %d",function(n){return n.getDay()&&1!=n.getDate()}],["%b %d",function(n){return 1!=n.getDate()}],["%B",function(n){return n.getMonth()}],["%Y",be]]),Os={range:function(n,t,e){return Xo.range(+n,+t,e).map(Io)},floor:bt,ceil:bt};Hs.year=tc.year,tc.scale=function(){return Yo(Xo.scale.linear(),Hs,Fs)};var Ys=Hs.map(function(n){return[n[0].utc,n[1]]}),Is=Ps.multi([[".%L",function(n){return n.getUTCMilliseconds()}],[":%S",function(n){return n.getUTCSeconds()}],["%I:%M",function(n){return n.getUTCMinutes()}],["%I %p",function(n){return n.getUTCHours()}],["%a %d",function(n){return n.getUTCDay()&&1!=n.getUTCDate()}],["%b %d",function(n){return 1!=n.getUTCDate()}],["%B",function(n){return n.getUTCMonth()}],["%Y",be]]);Ys.year=tc.year.utc,tc.scale.utc=function(){return Yo(Xo.scale.linear(),Ys,Is)},Xo.text=wt(function(n){return n.responseText}),Xo.json=function(n,t){return St(n,"application/json",Zo,t)},Xo.html=function(n,t){return St(n,"text/html",Vo,t)},Xo.xml=wt(function(n){return n.responseXML}),"function"==typeof define&&define.amd?define(Xo):"object"==typeof module&&module.exports?module.exports=Xo:this.d3=Xo}();
