# Supplementary material for: Colorectal Peritoneal Metastases: A Systematic Review of Current and Emerging Trends in Clinical and Translational Research
Source: Gastroenterol Res Pract. 2019 Apr 1;2019:5180895. doi: 10.1155/2019/5180895 (PMC6466888; doi:10.1155/2019/5180895)
Supplement: Supplementary Materials — Interactive figure for visual interpretation of the CPM research landscape. The available data for the three main categories and their respective subcategories is represented in the form of a sunburst diagram. [file 5180895.f1.zip › reza_data.csv]

imaging-non interventional-CT	6
imaging-non interventional-MRI	0
imaging-non interventional-PET/CT	4
imaging-non interventional-PET/CT vs. CT	4
imaging-non interventional-PET/CT vs. PET	1
imaging-non interventional-PET/CT vs. MRI vs. CT	2
imaging-non interventional-PET/CT vs. PET/MRI vs. MRI	1
imaging-non interventional-CT vs. CT+MRI	1
imaging-interventional-ultrasound	2
imaging-interventional-endoscopic ultrasound	2
imaging-interventional-virtual chromoendoscopy	1
imaging-interventional-immunofluorescence	4
biomarkers-diagnostic-CEA	4
biomarkers-diagnostic-CA125	2
biomarkers-prognostic-CEA	7
biomarkers-prognostic-CA125	1
biomarkers-prognostic-BRAF	3
biomarkers-prognostic-CA19_9	5
biomarkers-prognostic-KRAS	3
biomarkers-prognostic-COX2	1
biomarkers-prognostic-CA153	1
biomarkers-prognostic-VEGF	3
biomarkers-prognostic-CTHRC1	1
biomarkers-prognostic-CTGF	1
biomarkers-prognostic-PLR	2
biomarkers-prognostic-NLR	1
biomarkers-prognostic-MSI	1
biomarkers-prognostic-PIK3CA	1
biomarkers-therapeutic-KRAS	1
biomarkers-therapeutic-ERCC1	1
biomarkers-therapeutic-VEGF	2
biomarkers-therapeutic-other	2
delivery techniques-delivery technique-HIPEC	9
delivery techniques-delivery technique-PIPAC	5
delivery techniques-delivery technique-EPIC	0
delivery techniques-delivery technique-HIPEC vs. EPIC	2
delivery techniques-pharmacological-HA biconjugates	2
delivery techniques-pharmacological-drug loading vessels	8
delivery techniques-pharmacological-vessels in hydrogels	6
