# Supplementary material for: Colorectal Peritoneal Metastases: A Systematic Review of Current and Emerging Trends in Clinical and Translational Research
Source: Gastroenterol Res Pract. 2019 Apr 1;2019:5180895. doi: 10.1155/2019/5180895 (PMC6466888; doi:10.1155/2019/5180895)
Supplement: Supplementary Materials — Interactive figure for visual interpretation of the CPM research landscape. The available data for the three main categories and their respective subcategories is represented in the form of a sunburst diagram. [file 5180895.f1.zip › sequences.css]

body {
  font-family: 'Open Sans', sans-serif;
  font-size: 12px;
  font-weight: 400;
  background-color: #fff;
  width: 960px;
  height: 700px;
  margin-top: 10px;
}

#main {
  float: left;
  width: 750px;
}

#sidebar {
  float: right;
  width: 100px;
}

#sequence {
  width: 600px;
  height: 70px;
}

#legend {
  padding: 10px 0 0 3px;
}

#sequence text, #legend text {
  font-weight: 600;
  fill: #fff;
}

#chart {
  position: relative;
}

#chart path {
  stroke: #fff;
}

#explanation {
  position: absolute;
  top: 260px;
  left: 305px;
  width: 140px;
  text-align: center;
  color: #666;
  z-index: -1;
}

#percentage {
  font-size: 2.5em;
}
